# Supplementary material
Source: publisher site journal article supplement (https://edge.sagepub.com/sites/default/files/case_appendix.doc)
Supplement: Supplementary file 1 [file case_appendix.doc]

# Appendix: Additional Cases

**CHAPTER TWO**

# DID POLICE INTERROGATION PRACTICES VIOLATE DUE PROCESS OF LAW?

*BROWN V. MISSISSIPPI*

297 U.S. 278 (1936)

Hughes, J.

**Issue**

The question in this case is whether convictions, which rest solely upon confessions shown to have been extorted by officers of the State by brutality and violence, are consistent with the due process of law required by the Fourteenth Amendment of the Constitution of the United States.
**Facts**

Petitioners were indicted for the murder of one Raymond Stewart, whose death occurred on March 30, 1934. They were indicted on April 4, 1934, and were then arraigned and pleaded not guilty. Counsel were appointed by the court to defend them. Trial was begun the next morning and was concluded on the following day, when they were found guilty and sentenced to death.
Aside from the confessions, there was no evidence sufficient to warrant the submission of the case to the jury. After a preliminary inquiry, testimony as to the confessions was received over the objection of defendants' counsel. Defendants then testified that the confessions were false and had been procured by physical torture. The case went to the jury with instructions, upon the request of defendants' counsel, that if the jury had reasonable doubt as to the confessions having resulted from coercion, and that they were not true, they were not to be considered as evidence. On their appeal to the Supreme Court of the State, defendants assigned as error the inadmissibility of the confessions. The judgment was affirmed…. The opinion of the state court did not set forth the evidence as to the circumstances in which the confessions were procured. That the evidence established that they were procured by coercion was not questioned. The state court said: "After the state closed its case on the merits, the appellants, for the first time, introduced evidence from which it appears that the confessions were not made voluntarily but were coerced." There is no dispute as to the facts upon this point ….showing both the extreme brutality of the measures to extort the confessions and the participation of the state authorities.
 The crime with which these defendants, all ignorant negroes, are charged, was discovered about one o'clock p.m. on Friday, March 30, 1934. On that night one Dial, a deputy sheriff, accompanied by others, came to the home of Ellington, one of the defendants, and requested him to accompany them to the house of the deceased, and there a number of white men were gathered, who began to accuse the defendant of the crime. Upon his denial they seized him, and with the participation of the deputy they hanged him by a rope to the limb of a tree, and having let him down, they hung him again, and when he was let down the second time, and he still protested his innocence, he was tied to a tree and whipped, and still declining to accede to the demands that he confess, he was finally released and he returned with some difficulty to his home, suffering intense pain and agony. The record of the testimony shows that the signs of the rope on his neck were plainly visible during the so-called trial. A day or two thereafter the said deputy, accompanied by another, returned to the home of the said defendant and arrested him, and departed with the prisoner towards the jail in an adjoining county, but went by a route which led into the State of Alabama; and while on the way, in that State, the deputy stopped and again severely whipped the defendant, declaring that he would continue the whipping    until he confessed, and the defendant then agreed to confess to such a statement as the deputy would dictate, and he did so, after which he was delivered to jail.

 The other two defendants, Ed Brown and Henry Shields, were also arrested and taken to the same jail. On Sunday night, April 1, 1934, the same deputy, accompanied by a number of white men, one of whom was also an officer, and by the jailer, came to the jail, and the two last named defendants were made to strip and they were laid over chairs and their backs were cut to pieces with a leather strap with buckles on it, and they were likewise made by the said deputy definitely to understand that the whipping would be continued unless and until they confessed, and not only confessed, but confessed in every matter of detail as demanded by those present; and in this manner the defendants confessed the crime, and as the whippings progressed and were repeated, they changed or adjusted their confession in all particulars of detail so as to conform to the demands of their torturers. When the confessions had been obtained in the exact form and contents as desired by the mob, they left with the parting admonition and warning that, if the defendants changed their story at any time in any respect from that last stated, the perpetrators of the outrage would administer the same or equally effective treatment.
 Further details of the brutal treatment to which these helpless prisoners were subjected need not be pursued. It is sufficient to say that in pertinent respects the transcript reads more like pages torn from some medieval account, than a record made within the confines of a modern civilization which aspires to an enlightened constitutional government.
 All this having been accomplished, on the next day, that is, on Monday, April 2, when the defendants had been given time to recuperate somewhat from the tortures to which they had been subjected, the two sheriffs, one   of the county where the crime was committed, and the other of the county of the jail in which the prisoners were confined, came to the jail, accompanied by eight other persons, some of them deputies, there to hear the free and voluntary confession of these miserable and abject defendants. The sheriff of the county of the crime admitted that he had heard of the whipping, but averred that he had no personal knowledge of it. He admitted that one of the defendants, when brought before him to confess, was limping and did not sit down, and that this particular defendant then and there stated that he had been strapped so severely that he could not sit down, and as already stated, the signs of the rope on the neck of another of the defendants were plainly visible to all. Nevertheless the solemn farce of hearing the free and voluntary confessions was gone through with, and these two sheriffs  and one other person then present were the three witnesses used in court to establish the so-called confessions, which were received by the court and admitted in evidence over the objections of the defendants duly entered of record as each of the said three witnesses delivered their alleged testimony. There was thus enough before the court when these confessions were first offered to make known to the court that they were not, beyond all reasonable doubt, free and voluntary; and the failure of the court then to exclude the confessions is sufficient to reverse the judgment, under every rule of procedure that has heretofore been prescribed, and hence it was not necessary subsequently to renew the objections by motion or otherwise.
 The spurious confessions having been obtained -- and the farce last mentioned having been gone through with on Monday, April 2d -- the court, then in session, on the following day, Tuesday, April 3, 1934, ordered the grand jury to reassemble on the succeeding day, April 4, 1934, at nine o'clock, and on the morning of the day last mentioned  [*284]  the grand jury returned an indictment against the defendants for murder. Late that afternoon the defendants were brought from the jail in the adjoining county and arraigned, when one or more of them offered to plead guilty, which the court declined to accept, and, upon inquiry whether they had or desired counsel, they stated that they had none, and did not suppose that counsel could be of any assistance to them. The court thereupon appointed counsel, and set the case for trial for the following morning at nine o'clock, and the defendants were returned to the jail in the adjoining county about thirty miles away.
 The defendants were brought to the courthouse of the county on the following morning, April 5th, and the so-called trial was opened, and was concluded on the next day, April 6, 1934, and resulted in a pretended conviction with death sentences. The evidence upon which the conviction was obtained was the so-called confessions. Without this evidence a peremptory instruction to find for the defendants would have been inescapable. The defendants were put on the stand, and by their testimony the facts and the details thereof as to the manner by which the confessions were extorted from them were fully developed, and it is further disclosed by the record that the same deputy, Dial, under whose guiding hand and active participation the tortures to coerce the confessions were administered, was actively in the performance of the supposed duties of a court deputy in the courthouse and in the presence of the prisoners during what is denominated, in complimentary terms, the trial of these defendants. This deputy was put on the stand by the state in rebuttal, and admitted the whippings. It is interesting to note that in his testimony with reference to the whipping of the defendant Ellington, and in response to the inquiry as to how severely he was whipped, the deputy stated, 'Not too much for a negro; not as much as I would have done if it were left to me.' Two others who had participated in these whippings were introduced and admitted it -- not a single witness was introduced who denied it. The facts are not only undisputed, they are admitted, and admitted to have been done by officers of the state, in conjunction with other participants, and all this was definitely well known to everybody connected with the trial, and during the trial, including the state's prosecuting attorney and the trial judge presiding."
**Reasoning**

The State stresses the statement in *Twining* v. *New Jersey*, 211 U.S. 78, 114, that "exemption from compulsory self-incrimination in the courts of the States is not secured by any part of the Federal Constitution," and the statement in *Snyder* v. *Massachusetts*, 291 U.S. 97, 105, that "the privilege against self-incrimination may be withdrawn and the accused put upon the stand as a witness for the State." But the question of the right of the State to withdraw the privilege against self-incrimination is not here involved. The compulsion to which the quoted statements refer is that of the processes of justice by which the accused may be called as a witness and required to testify. Compulsion by torture to extort a confession is a different matter.
  The State is free to regulate the procedure of its courts in accordance with its own conceptions of policy, unless in so doing it "offends some principle of justice so rooted in the traditions and conscience of our people as to be ranked as fundamental.  The State may abolish trial by jury. It may dispense with indictment by a grand jury and substitute complaint or information. But the freedom of the State in establishing its policy is the freedom of constitutional government and is limited by the requirement of due process of law. Because a State may dispense with a jury trial, it does not follow that it may substitute trial by ordeal. The rack and torture  chamber may not be substituted for the witness stand. The State may not permit an accused to be hurried to conviction under mob domination -- where the whole proceeding is but a mask -- without supplying corrective process. The State may not deny to the accused the aid of counsel. Nor may a State, through the action of its officers, contrive a conviction through the pretense of a trial which in truth is "but used as a means of depriving a defendant of liberty through a deliberate deception of court and jury by the presentation of testimony known to be perjured." And the trial equally is a mere pretense where the state authorities have contrived a conviction resting solely upon confessions obtained by violence. The due process clause requires "that state action, whether through one agency or another, shall be consistent with the fundamental principles of liberty and justice which lie at the base of all our civil and political institutions." It would be difficult to conceive of methods more revolting to the sense of justice than those taken to procure the confessions of these petitioners, and the use of the confessions thus obtained as the basis for conviction and sentence was a clear denial of due process.
 It is in this view that the further contention of the State must be considered. That contention rests upon the failure of counsel for the accused, who had objected to the admissibility of the confessions, to move for their exclusion after they had been introduced and the fact of coercion had been proved. It is a contention which proceeds upon a misconception of the nature of petitioners' complaint.That complaint is not of the commission of mere error, but of a wrong so fundamental that it made the whole proceeding a mere pretense of a trial and rendered the conviction and sentence wholly void. We are not concerned with a mere  question of state practice, or whether counsel assigned to petitioners were competent or mistakenly assumed that their first objections were sufficient. In an earlier case the Supreme Court of the State had recognized the duty of the court to supply corrective process where due process of law had been denied: "Coercing the supposed state's criminals into confessions and using such confessions so coerced from them against them in trials has been the curse of all countries. It was the chief inequity, the crowning infamy of the Star Chamber, and the Inquisition, and other similar institutions. The constitution recognized the evils that lay behind these practices and prohibited them in this country. . . . The duty of maintaining constitutional rights of a person on trial for his life rises above mere rules of procedure and wherever the court is clearly satisfied that such violations exist, it will refuse to sanction such violations and will apply the corrective."
**Holding**

In the instant case, the trial court was fully advised by the undisputed evidence of the way in which the confessions had been procured. The trial court knew that there was no other evidence upon which conviction and sentence could be based. Yet it proceeded to permit conviction and to pronounce sentence. The conviction and sentence were void for want of the essential elements of due process,  and the proceeding thus vitiated could be challenged in any appropriate manner. It was challenged before the Supreme Court of the State by the express invocation of the Fourteenth Amendment. That court entertained the challenge, considered the federal question thus presented, but declined to enforce petitioners' constitutional right. The court thus denied a federal right fully established and specially set up and claimed and the judgment must be
**Questions for Discussion**

1. Why did the Supreme Court conclude that the defendants’ trial was a “mere pretense” and violated due process of law. Was this holding consistent with the other decisions in which the Supreme Court determined that there was a violation of due process of law.

2. Can you distinguish between *Brown* and the judgments in which the Supreme Court found that there was no violation of due process.

3. What is the holding *Brown.*
4. **Police practices.** As a police officer, what does the decision in *Brown* tell you about what interrogation practices are permitted and about what interrogation practices are prohibited.

# IS THE SIXTH AMENDMENT RIGHT TO A JURY TRIAL INCORPORATED INTO THE FOURTEENTH AMENDMENT?

*DUNCAN v. LOUISIANA*

391 U.S. 145 (1968)

White, J.
**Issue**
Appellant, Gary Duncan, was convicted of simple battery in the Twenty-fifth Judicial District Court of Louisiana. Under Louisiana law simple battery is a misdemeanor, punishable by a maximum of two years' imprisonment and a $ 300 fine. Appellant sought trial by jury, but because the Louisiana Constitution grants jury trials only in cases in which capital punishment or imprisonment at hard labor may be imposed, the trial judge denied the request. Appellant was convicted and sentenced to serve 60 days in the parish prison and pay a fine of $ 150. Appellant sought review in the Supreme Court of Louisiana, asserting that the denial of jury trial violated rights guaranteed to him by the United States Constitution. Appellant sought review in this Court, alleging that the Sixth and Fourteenth Amendments to the United States Constitution secure the right to jury trial in state criminal prosecutions where a sentence as long as two years may be imposed….
**Facts**

Appellant was 19 years of age when tried. While driving on Highway 23 in Plaquemines Parish on October 18, 1966, he saw two younger cousins engaged in a conversation by the side of the road with four white boys. Knowing his cousins, Negroes who had recently transferred to a formerly all-white high school, had reported the occurrence of racial incidents at the school, Duncan stopped the car, got out, and approached the six boys. At trial the white boys and a white onlooker testified, as did appellant and his cousins. The testimony was in dispute on many points, but the witnesses agreed that appellant and the white boys spoke to each other, that appellant encouraged his cousins to break off the encounter and enter his car, and that appellant was about to enter the car himself for the purpose of driving away with his cousins. The whites testified that just before getting in the car appellant slapped Herman Landry, one of the white boys, on the elbow. The Negroes testified that appellant had not slapped Landry, but had merely touched him. The trial judge concluded that the State had proved beyond a reasonable doubt that Duncan had committed simple battery, and found him guilty.
 The Fourteenth Amendment denies the States the power to "deprive any person of life, liberty, or property, without due process of law." In resolving conflicting claims concerning the meaning of this spacious language, the Court has looked increasingly to the Bill of Rights for guidance; many of the rights guaranteed by the first eight Amendments to the Constitution have been held to be protected against state action by the Due Process Clause of the Fourteenth Amendment. That clause now protects the right to compensation for property taken by the State; the rights of speech, press, and religion covered by the First Amendment; the Fourth Amendment rights to be free from unreasonable searches and seizures and to have excluded from criminal trials any evidence illegally seized; the right guaranteed by the Fifth Amendment to be free of compelled self-incrimination; and the Sixth Amendment rights to counsel, to a speedy and public trial, to confrontation of opposing witnesses, and to compulsory process for obtaining witnesses.
 The test for determining whether a right extended by the Fifth and Sixth Amendments with respect to federal criminal proceedings is also protected against state action by the Fourteenth Amendment has been phrased in a variety of ways in the opinions of this Court. The question has been asked whether a right is among those "'fundamental principles of liberty and justice which lie at the base of all our civil and political institutions,'" whether  it is "basic in our system of jurisprudence," and whether it is "a fundamental right, essential to a fair trial." The claim before us is that the right to trial by jury guaranteed by the Sixth Amendment meets these tests. The position of Louisiana, on the other hand, is that the Constitution imposes upon the States no duty to give a jury trial in any criminal case, regardless of the seriousness of the crime or the size of the punishment which may be imposed. Because we believe that trial by jury in criminal cases is fundamental to the American scheme of justice, we hold that he Fourteenth Amendment guarantees a right of jury trial in all criminal cases which -- were they to be tried in a federal court -- would come within the Sixth Amendment's guarantee. Since  [we consider the appeal before us to be such a case, we  hold that the Constitution was violated when appellant's demand for jury trial was refused.
 The history of trial by jury in criminal cases has been frequently told. It is sufficient for present purposes to say that by the time our Constitution was written, jury trial in criminal cases had been in existence in England for several centuries and carried impressive credentials traced by many to Magna Carta. Its preservation and proper operation as a protection against arbitrary rule were among the major objectives of the revolutionary settlement which was expressed in the Declaration and Bill of Rights of 1689. In the 18th century Blackstone could write that " the founders of the English law have, with excellent forecast, contrived that . . . the truth of every accusation, whether preferred in the shape of indictment, information, or appeal, should afterwards be confirmed by the unanimous suffrage of twelve of his equals and neighbours, indifferently chosen and superior to all suspicion."
 Jury trial came to America with English colonists, and received strong support from them. Royal interference with the jury trial was deeply resented. Among the resolutions adopted by the First Congress of the American Colonies (the Stamp Act Congress) on October 19, 1765 -- resolutions deemed by their authors to state "the most essential rights and liberties of the colonists"-- was the declaration “[t]hat trial by jury is the inherent and invaluable right of every British subject in these colonies."….
 The Declaration of Independence stated solemn objections to the King's making "Judges dependent on his Will alone, for the tenure of their offices, and the amount and payment of their salaries," to his "depriving us in many cases, of the benefits of Trial by Jury," and to his "transporting us beyond Seas to be tried for pretended offenses." The Constitution itself, in Art. III, § 2, commanded "The Trial of all Crimes, except in Cases of Impeachment, shall be by Jury; and such Trial shall  be held in the State where the said Crimes shall have been committed."
 Objections to the Constitution because of the absence of a bill of rights were met by the immediate submission and adoption of the Bill of Rights. Included was the Sixth Amendment which, among other things, provided that "In all criminal prosecutions, the accused shall enjoy the right to a speedy and public trial, by an impartial jury of the State and district wherein the crime shall have been committed."
 The constitutions adopted by the original States guaranteed jury trial. Also, the constitution of every State entering the Union thereafter in one form or another protected the right to jury trial in criminal cases. Even such skeletal history is impressive support for considering the right to jury trial in criminal cases to be fundamental to our system of justice, an importance frequently recognized in the opinions of this Court. For example, the Court has said:
 Jury trial continues to receive strong support. The laws of every State guarantee a right to jury trial in serious criminal cases; no State has dispensed with it; nor are there significant movements underway to do so. Indeed, the three most recent state constitutional revisions, in Maryland, Michigan, and New York, carefully preserved the right of the accused to have the judgment of a jury when tried for a serious crime.
**Holding**

The guarantees of jury trial in the Federal and State Constitutions reflect a profound judgment about the way in which law should be enforced and justice administered. A right to jury trial is granted to criminal defendants in order to prevent oppression by the Government. Those who wrote our constitutions knew from history and  experience that it was necessary to protect against unfounded criminal charges brought to eliminate enemies and against judges too responsive to the voice of higher authority. The framers of the constitutions strove to create an independent judiciary but insisted upon further protection against arbitrary action. Providing an accused with the right to be tried by a jury of his peers gave him an inestimable safeguard against the corrupt or overzealous prosecutor and against the compliant, biased, or eccentric judge. If the defendant preferred the common-sense judgment of a jury to the more tutored but perhaps less sympathetic reaction of the single judge, he was to have it. Beyond this, the jury trial provisions in the Federal and State Constitutions reflect a fundamental decision about the exercise of official power -- a reluctance to entrust plenary powers over the life and liberty of the citizen to one judge or to a group of judges. Fear of unchecked power, so typical of our State and Federal Governments in other respects, found expression in the criminal law in this insistence upon community participation in the determination of guilt or innocence. The deep commitment of the Nation to the right of jury trial in serious criminal cases as a defense against arbitrary law enforcement qualifies for protection under the Due Process Clause of the Fourteenth Amendment, and must therefore be respected by the States.
 Of course jury trial has "its weaknesses and the potential for misuse." We are aware of the long debate, especially in this century, among those who write about the administration of justice, as to the wisdom of permitting untrained laymen to determine the facts in civil and criminal proceedings. Although the debate has been intense, with powerful voices on either side, most of the controversy has centered on the jury in civil cases. Indeed, some of the severest critics of civil juries acknowledge that the arguments for criminal juries are much stronger. In addition, at the heart of the dispute have been express or implicit assertions that juries are incapable of adequately understanding evidence or determining issues of fact, and that they are unpredictable, quixotic, and little better than a roll of dice. Yet, the most recent and exhaustive study of the jury in criminal cases concluded that juries do understand the evidence and come to sound conclusions in most of the cases presented to them and that when juries differ with the result at which the judge would have arrived, it is usually because they  are serving some of the very purposes for which they were created and for which they are now employed.
 The State of Louisiana urges that holding that the Fourteenth Amendment assures a right to jury trial will cast doubt on the integrity of every trial conducted without a jury. Plainly, this is not the import of our holding. Our conclusion is that in the American States, as in the federal judicial system, a general grant of jury trial for serious offenses is a fundamental right, essential for preventing miscarriages of justice and for assuring that fair trials are provided for all defendants. We would not assert, however, that every criminal trial -- or any particular trial -- held before a judge alone is unfair or that a defendant may never be as fairly treated by a judge as he would be by a jury. Thus we hold no constitutional doubts about the practices, common in both federal and state courts, of accepting waivers of jury trial and prosecuting petty crimes without extending a right to jury trial. However, the fact is that in most places more trials for serious crimes are to juries than to a court alone; a great many defendants prefer the judgment of a jury to that of a court. Even where defendants are satisfied with bench trials, the right to a jury trial very likely serves its intended purpose of making judicial or prosecutorial unfairness less likely.
 Louisiana's final contention is that even if it must grant jury trials in serious criminal cases, the conviction  before us is valid and constitutional because here the petitioner was tried for simple battery and was sentenced to only 60 days in the parish prison. We are not persuaded. It is doubtless true that there is a category of petty crimes or offenses which is not subject to the Sixth Amendment jury trial provision and should not be subject to the Fourteenth Amendment jury trial requirement here applied to the States. Crimes carrying possible penalties up to six months do not require a jury trial if they otherwise qualify as petty offenses, But the penalty authorized for a particular crime is of major relevance in determining whether it is serious or not and may in itself, if severe enough, subject the trial to the mandates of the Sixth Amendment. The penalty authorized by the law of the locality may be taken "as a gauge of its social and ethical judgments," of the crime in question. …The question, then, is whether a crime carrying such a penalty is an offense which Louisiana may insist on trying without a jury.
 We think not. So-called petty offenses were tried without juries both in England and in the Colonies and have always been held to be exempt from the otherwise comprehensive language of the Sixth Amendment's jury trial provisions. There is no substantial evidence that the Framers intended to depart from this established common-law practice, and the possible consequences to defendants from convictions for petty offenses have been thought insufficient to outweigh the benefits to efficient law enforcement and simplified judicial administration resulting from the availability of speedy and inexpensive nonjury adjudications. These same considerations compel the same result under the Fourteenth Amendment. Of course the boundaries of the petty offense category have always been ill-defined…[i]n the absence of an explicit constitutional provision, the definitional task necessarily falls on the courts, which must either pass upon the validity of legislative attempts to identify those petty offenses which are exempt from jury trial or, where the legislature has not addressed itself to the problem, themselves face the question in the first instance. In either case it is necessary to draw a line in the spectrum of crime, separating petty from serious  infractions. This process, although essential, cannot be wholly satisfactory, for it requires attaching different consequences to events which, when they lie near the line, actually differ very little.
 In determining whether the length of the authorized prison term or the seriousness of other punishment is enough in itself to require a jury trial, we…refer to objective criteria, chiefly the existing laws and practices in the Nation. In the federal system, petty offenses are defined as   those punishable by no more than six months in prison and a $ 500 fine. In 49 of the 50 States crimes subject to trial without a jury, which occasionally include simple battery, are punishable by no more than one year in jail. …We need not, however, settle in this case the exact location of the line between petty offenses and serious crimes. It is sufficient for our purposes to hold that a crime punishable by two years in prison is, based on past and contemporary standards in this country, a serious crime and not a petty offense. Consequently, appellant was entitled to a jury trial and it was error to deny it.

Mr. Justice Black with whom Mr. Justice Douglas, joins **concurring**

 The Court today holds that the right to trial by jury guaranteed   defendants in criminal cases in federal courts by Art. III of the United States Constitution and by the Sixth Amendment is also guaranteed by the Fourteenth Amendment to defendants tried in state courts. With this holding I agree for reasons given by the Court. I also agree because of reasons given in my dissent in *Adamson* v. *California*, 332 U.S. 46, 68. In that dissent, I took the position…that the Fourteenth Amendment made all of the provisions of the Bill of Rights applicable to the States….
 And I am very happy to support this selective process through which our Court has…held most of the specific Bill of Rights' protections applicable to the States to the same extent they are applicable to the Federal Government. Among these are the right to trial by jury decided today, the right against compelled self-incrimination, the right to counsel, the right to compulsory process for witnesses, the right to confront witnesses, the right to a speedy and public trial, and the right to be free from unreasonable searches and seizures.
 All of these holdings making Bill of Rights' provisions applicable as such to the States mark, of course, a departure from the *Twining* doctrine holding that none of those provisions were enforceable as such against the States.
 I can say only that the words "No State shall make or enforce any law which shall abridge the privileges or immunities of citizens of the United States" seem to me an eminently reasonable way of expressing the idea that henceforth the Bill of Rights shall apply to the States. …T]he "fundamental fairness" test is one on a par with that of shocking the conscience of the Court. Each of such tests depends entirely on the particular judge's idea of ethics and morals instead of requiring him to depend on the boundaries fixed by the written words of the Constitution. Nothing in the history of the phrase "due process of law" suggests that constitutional controls are to depend on any particular judge's sense of values. …There is not one word of legal history that justifies making the   term "due process of law" mean a guarantee of a trial free from laws and conduct which the courts deem at the time to be "arbitrary," "unreasonable," "unfair," or "contrary to civilized standards." The due process of law standard for a trial is one in accordance with the Bill of Rights and laws passed pursuant to constitutional power, guaranteeing to all alike a trial under the general law of the land.
 Finally I want to add that I am not bothered by the argument that applying the Bill of Rights to the States, "according to the same standards that protect those personal rights against federal encroachment," interferes with our concept of federalism in that it may prevent States from trying novel social and economic experiments. I have never believed that under the guise of federalism the States should be able to experiment with the protections afforded our citizens through the Bill of Rights. It seems to me totally inconsistent to advocate, on the one hand, the power of this Court to strike down any state law or practice which it finds "unreasonable" or "unfair" and, on the other hand, urge that the States be  given maximum power to develop their own laws and procedures. Yet the fundamental fairness approach does just that since in effect it restricts the States to practices which a majority of this Court is willing to approve on a case-by-case basis. No one is more concerned than I that the States be allowed to use the full scope of their powers as their citizens see fit. And that is why I have continually fought against the expansion of this Court's authority over the States through the use of a broad, general interpretation  of due process that permits judges to strike down state laws they do not like.
 In closing I want to emphasize that I believe as strongly as ever that the Fourteenth Amendment was intended to make the Bill of Rights applicable to the States. I have been willing to support the selective incorporation doctrine, however, as an alternative, although perhaps less historically supportable than complete incorporation. The selective incorporation process, if used properly, does limit the Supreme Court in the Fourteenth Amendment field to specific Bill of Rights' protections only and keeps judges from roaming at will in their own notions of what policies outside the Bill of Rights are desirable and what are not. And, most importantly for me, the selective incorporation process has the virtue of having already worked to make most of the Bill of Rights' protections applicable to the States.

Mr. Justice Harlan, with whom Mr. Justice Stewart joins **dissenting**.

Every American jurisdiction provides for trial by jury in criminal cases. The question before us is not whether jury trial is an ancient institution, which it is; nor whether it plays a significant role in the administration of criminal justice, which it does; nor whether it will endure, which it shall. The question in this case is whether the State of Louisiana, which provides trial by jury for all felonies, is prohibited by the Constitution from trying charges of simple battery to the court alone. In my view, the answer to that question, mandated alike by our constitutional history and by the longer history of trial by jury, is clearly "no."
 The States have always borne primary responsibility for operating the machinery of criminal justice within their borders, and adapting it to their particular circumstances. In exercising this responsibility, each State is compelled to conform its procedures to the requirements of the Federal Constitution. The Due Process Clause of the Fourteenth Amendment requires that those procedures be fundamentally fair in all respects. It does not, in my view, impose or encourage nationwide uniformity for its own sake; it does not command adherence to forms that happen to be old; and it does not impose on the States the rules that may be in force in the federal courts except where such rules are also found to be essential to basic fairness.
 A few members of the Court have taken the position that the intention of those who drafted the first section of the Fourteenth Amendment was simply, and exclusively, to make the provisions of the first eight Amendments applicable to state action. This view has never been accepted by this Court. In my view, often expressed elsewhere, the first section of the Fourteenth Amendment was meant neither to incorporate, nor to be limited to, the specific guarantees of the first eight Amendments. The overwhelming historical evidence…demonstrates, to me conclusively, that the Congressmen and state legislators who wrote, debated, and ratified the Fourteenth Amendment did not think they were "incorporating" the Bill of Rights and  the very  breadth and generality of the Amendment's provisions suggest that its authors did not suppose that the Nation would always be limited to mid-19th century conceptions of "liberty" and "due process of law" but that the increasing experience and evolving conscience of the American people would add new "intermediate premises." In short, neither history, nor sense, supports using the Fourteenth Amendment to put the States in a constitutional straitjacket with respect to their own development in the administration of criminal or civil law.
 Although I therefore fundamentally disagree with the total incorporation view of the Fourteenth Amendment, it seems to me that such a position does at least have the virtue, lacking in the Court's selective incorporation approach, of internal consistency: we look to the Bill of Rights, word for word, clause for clause, precedent for precedent because, it is said, the men who wrote the Amendment wanted it that way. For those who do not accept this "history," a different source of "intermediate premises" must be found. The Bill of Rights is not necessarily irrelevant to the search for guidance in interpreting the Fourteenth Amendment, but the reason for and the nature of its relevance must be articulated.
 Apart from the approach taken by the absolute incorporationists, I can see only one method of analysis that has any internal logic. That is to start with the words "liberty" and "due process of law" and attempt to define them in a way that accords with American traditions and our system of government. This approach, involving a much more discriminating process of adjudication than does "incorporation," is, albeit difficult, the one that was followed throughout the 19th and most of the present century. It entails a "gradual process of judicial inclusion and exclusion," seeking, with due recognition of constitutional tolerance for state experimentation and disparity, to ascertain those "immutable principles . . . of free government which no member of the Union may disregard." Due process was not restricted to rules fixed in the past, for that "would be to   deny every quality of the law but its age, and to render it incapable of progress or improvement." or did it impose nationwide uniformity in details, for "the Fourteenth Amendment does not profess to secure to all persons in the United States the benefit of the same laws and the same remedies. Great diversities in these respects may exist in two States separated only by an imaginary line. On one side of this line there may be a right of trial by jury, and on the other side no such right. Each State prescribes its own modes of judicial proceeding."
Through this gradual process, this Court sought to define "liberty" by isolating freedoms that Americans of the past and of the present considered more important than any suggested countervailing public objective. The Court also, by interpretation of the phrase "due process of law," enforced the Constitution's guarantee that no State may imprison an individual except by fair and impartial procedures.
 Today's Court still remains unwilling to accept the total incorporationists' view of the history of the Fourteenth Amendment. This, if accepted, would afford a cogent reason for applying the Sixth Amendment to the States. The Court is also, apparently, unwilling to face the task of determining whether denial of trial by jury in the situation before us, or in other situations, is fundamentally unfair. Consequently, the Court has compromised on the ease of the incorporationist position, without its internal logic. It has simply assumed that the question before us is whether the Jury Trial Clause of the Sixth Amendment should be incorporated into the Fourteenth, jot-for-jot and case-for-case, or ignored. Then the Court merely declares that the clause in question is "in" rather than "out…."
 Since, as I see it, the Court has not even come to grips with the issues in this case, it is necessary to start from the beginning. When a criminal defendant contends that his state conviction lacked "due process of law," the question before this Court, in my view, is whether he was denied any element of fundamental procedural fairness. Believing, as I do, that due process is an evolving concept and that old principles are subject to re-evaluation in light of later experience, I think it  appropriate to deal on its merits with the question whether Louisiana denied appellant due process of law when it tried him for simple assault without a jury.
 The argument that jury trial is not a requisite of due process is quite simple. The central proposition of *Palko, supra*, a proposition to which I would adhere, is that "due process of law" requires only that criminal trials be fundamentally fair. As stated above, apart from the theory that it was historically intended as a mere shorthand for the Bill of Rights, I do not see what else "due process of law" can intelligibly be thought to mean. If due process of law requires only fundamental  fairness, then the inquiry in each case must be whether a state trial process was a fair one. The Court has held, properly I think, that in an adversary process it is a requisite of fairness, for which there is no adequate substitute, that a criminal defendant be afforded a right to counsel and to cross-examine opposing witnesses. But it simply has not been demonstrated, nor, I think, can it be demonstrated, that trial by jury is the only fair means of resolving issues of fact.
 The jury is of course not without virtues. It affords ordinary citizens a valuable opportunity to participate in a process of government, an experience fostering, one hopes, a respect for law. It eases the burden on judges by enabling them to share a part of their sometimes awesome responsibility. A jury may, at times, afford a higher justice by refusing to enforce harsh laws (although it necessarily does so haphazardly, raising the questions whether arbitrary enforcement of harsh laws is better than total enforcement, and whether the jury system is to be defended on the ground that jurors sometimes disobey their oaths). And the jury may, or may not, contribute desirably to the willingness of the general public to accept criminal judgments as just.
 The jury system can also be said to have some inherent defects, which are multiplied by the emergence of the criminal law from the relative simplicity that existed when the jury system was devised. It is a cumbersome process, not only imposing great cost in time and money on both the State and the jurors themselves, but also contributing to delay in the machinery of justice. Untrained jurors are presumably less adept at reaching accurate conclusions of fact than judges,   particularly if the issues are many or complex. And it is argued by some that trial by jury, far from increasing public respect for law, impairs it: the average man, it is said, reacts favorably neither to the notion that matters he knows to be complex are being decided by other average men, nor to the way the jury system distorts the process of adjudication.
 That trial by jury is not the only fair way of adjudicating criminal guilt is well attested by the fact that it is not the prevailing way, either in England or in this country. For England, one expert makes the following estimates. Parliament generally provides that new statutory offenses, unless they are of "considerable gravity" shall be tried to judges; consequently, summary offenses now outnumber offenses for which jury trial is afforded by more than six to one. Then, within the latter category, 84% of all cases are in fact tried to the court. Over all, "the ratio of defendants actually tried by jury becomes in some years little more than 1 per cent."
 In the United States, where it has not been as generally assumed that jury waiver is permissible, the statistics are only slightly less revealing. Two experts have estimated that, of all prosecutions for crimes triable to a jury, 75% are settled by guilty plea and 40% of the remainder are tried to the court. In one State, Maryland, which has always provided for waiver, the rate of court trial appears in some years to have reached 90%. …I therefore see no reason why this Court should reverse the conviction of appellant, absent any suggestion that his particular trial was in fact unfair, or compel the State of Louisiana to afford jury trial in an as yet unbounded category of cases that can, without unfairness, be tried to a court….
 The point is not that many offenses that English-speaking communities have, at one time or another, regarded as triable without a jury are more serious, and carry more serious penalties, than the one involved here. The point is rather that until today few people would have thought the exact location of the line mattered very much. There is no obvious reason why a jury trial is a requisite of fundamental fairness when the charge is robbery, and not a requisite of fairness when the same defendant, for the same actions, is charged with assault and petty theft. The reason for the historic exception for relatively minor crimes is the obvious one: the burden of jury trial was thought to outweigh its marginal advantages. Exactly why the States should not be allowed to make continuing adjustments, based on the state of their criminal dockets and the difficulty of summoning jurors, simply escapes me.
 In sum, there is a wide range of views on the desirability of trial by jury, and on the ways to make it most effective when it is used; there is also considerable variation from State to State in local conditions such as the size of the criminal caseload, the ease or difficulty of summoning jurors, and other trial conditions bearing on fairness. We have before us, therefore, an almost perfect example of a situation in which the celebrated dictum of Mr. Justice Brandeis should be invoked. It is, he said, "’one of the happy  incidents of the federal system that a single courageous State may, if its citizens choose, serve as a laboratory .’”
**Questions for Discussion**

1. What is the holding of the case?

2.What is the holding of the case. Explain why *Duncan* is an example of the Supreme Court applying the theory of “selective incorporation.”

3. Summarize Justice Black’s “total incorporation approach.” Why is he critical of Justice Harlan’s advocacy of “fundamental fairness.”

4. How does Justice Harlan’s fundamental fairness approach differ from the incorporation philosophy. Do you agree that a jury trial is not fundamental?

**CHAPTER THREE**

# DID WHITE HAVE AN EXPECTATION OF PRIVACY IN THE CONTENT OF HIS CONVERSATIONS?

*UNITED STATES V. WHITE* 401 U.S. 745 (1971)

White J.

**Issue**

In 1966, respondent James A. White was tried and convicted under two consolidated indictments charging various illegal transactions in narcotics. He was fined and sentenced as a second offender to 25-year concurrent sentences. The issue before us is whether the Fourth Amendment bars from evidence the testimony of governmental agents who related certain conversations which had occurred between defendant White and a government informant, Harvey Jackson, and which the agents overheard by monitoring the frequency of a radio transmitter carried by Jackson and concealed on his person. **Facts**

On four occasions the conversations took place in Jackson's home; each of these conversations was overheard by an agent concealed in a kitchen closet with Jackson's consent and by a second agent outside the house using a radio receiver. Four other conversations - one in respondent's home, one in a restaurant, and two in Jackson's car - were overheard by the use of radio equipment. The prosecution was unable to locate and produce Jackson at the trial and the trial court overruled objections to the testimony of the agents who conducted the electronic surveillance. The jury returned a guilty verdict and defendant appealed.

**Reasoning**
 Concededly a police agent who conceals his police connections may write down for official use his conversations with a defendant and testify concerning them, without a warrant authorizing his encounters with the defendant and without otherwise violating the latter's Fourth Amendment rights. For constitutional purposes, no different result is required if the agent instead of immediately reporting and transcribing his conversations with defendant, either (1) simultaneously records them with electronic equipment which he is carrying on his person; (2) or carries radio equipment which simultaneously transmits the conversations either to recording equipment located elsewhere or to other agents monitoring the transmitting frequency. If the conduct and revelations of an agent operating without electronic equipment do not invade the defendant's constitutionally justifiable expectations of privacy, neither does a simultaneous recording of the same conversations made by the agent or by others from transmissions received from the agent to whom the defendant is talking and whose trustworthiness the defendant necessarily risks.
 Our problem is not what the privacy expectations of particular defendants in particular situations may be or the extent to which they may in fact have relied on the discretion of their companions. Very probably, individual defendants neither know nor suspect that their colleagues have gone or will go to the police or are carrying recorders or transmitters. Otherwise, conversation would cease and our problem with these encounters would be nonexistent or far different from those now before us. Our problem, in terms of the principles announced in Katz, is what expectations of privacy are constitutionally "justifiable" - what expectations the Fourth Amendment will protect in the absence of a warrant. So far, the law permits the frustration of actual expectations of privacy by permitting authorities to use the testimony of those associates who for one reason or another have determined to turn to the police, as well as by authorizing the use of informants in the manner exemplified by Hoffa and Lewis. If the law gives no protection to the wrongdoer whose trusted accomplice is or becomes a police agent, neither should it protect him when that same agent has recorded or transmitted the conversations which are later offered in evidence to prove the State's case.
 Inescapably, one contemplating illegal activities must realize and risk that his companions may be reporting to the police. If he sufficiently doubts their trustworthiness, the association will very probably end or never materialize. But if he has no doubts, or allays them, or risks what doubt he has, the risk is his. In terms of what his course will be, what he will or will not do or say, we are unpersuaded that he would distinguish between probable informers on the one hand and probable informers with transmitters on the other. Given the possibility or probability that one of his colleagues is cooperating with the police, it is only speculation to assert that the defendant's utterances would be substantially different or his sense of security any less if he also thought it possible that the suspected colleague is wired for sound. At least there is no persuasive evidence that the difference in this respect between the electronically equipped and the unequipped agent is substantial enough to require discrete constitutional recognition, particularly under the Fourth Amendment which is ruled by fluid concepts of "reasonableness." Nor should we be too ready to erect constitutional barriers to relevant and probative evidence which is also accurate and reliable. An electronic recording will many times produce a more reliable rendition of what a defendant has said than will the unaided memory of a police agent. It may also be that with the recording in existence it is less likely that the informant will change his mind, less chance that threat or injury will suppress unfavorable evidence and less chance that cross-examination will confound the testimony. Considerations like these obviously do not favor the defendant, but we are not prepared to hold that a defendant who has no constitutional right to exclude the informer's unaided testimony nevertheless has a Fourth Amendment privilege against a more accurate version of the events in question.

DOUGLAS, J. **dissenting.**

The threads of thought running through our recent decisions are that these extensive intrusions into privacy made by electronic surveillance make self-restraint by law enforcement officials an inadequate protection, that the requirement of warrants under the Fourth Amendment is essential to a free society. Monitoring, if prevalent, certainly kills free discourse and spontaneous utterances. Free discourse - a First Amendment value - may be frivolous or serious, humble or defiant, reactionary or revolutionary, profane or in good taste; but it is not free if there is surveillance.  Free discourse liberates the spirit, though it may produce only froth. The individual must keep some facts concerning his thoughts within a small zone of people. At the same time he must be free to pour out his woes or inspirations or dreams to others. He remains the sole judge as to what must be said and what must remain unspoken. This is the essence of the idea of privacy implicit in the First and Fifth Amendments as well as in the Fourth.

The philosophy of the value of privacy reflected in the Fourth Amendment's ban on "unreasonable searches and seizures" has been forcefully stated by a former Attorney General of the United States:

"Privacy is the basis of individuality. To be alone and be let alone, to be with chosen company, to say what you think, or don't think, but to say what you will, is to be yourself. Solitude is imperative, even in a high rise apartment. Personality develops from within. To reflect is to know yourself. Character is formed through years of self-examination. Without this opportunity, character will be formed largely by uncontrolled external social stimulations. Americans are excessively homogenized already.

"Few conversations would be what they are if the speakers thought others were listening. Silly, secret, thoughtless and thoughtful statements would all be affected. The sheer numbers in our lives, the anonymity of urban living and the inability to influence things that are important are depersonalizing and dehumanizing factors of modern life. To penetrate the last refuge of the individual, the precious little privacy that remains, the basis of individual dignity, can have meaning to the quality of our lives that we cannot foresee. In terms of present values, that meaning cannot be good. [401 U.S. 745, 764]

"Invasions of privacy demean the individual. Can a society be better than the people composing it? When a government degrades its citizens, or permits them to degrade each other, however beneficent the specific purpose, it limits opportunities for individual fulfillment and national accomplishment. If America permits fear and its failure to make basic social reforms to excuse police use of secret electronic surveillance, the price will be dear indeed. The practice is incompatible with a free society." R. Clark, Crime in America 287 (1970).

Now ...must everyone live in fear that every word he speaks may be transmitted or recorded and later repeated to the entire world? I can imagine nothing that has a more chilling effect on people speaking their minds and expressing their views on important matters. The advocates of that regime should spend some time in totalitarian countries and learn firsthand the kind of regime they are creating here. **Questions for Discussion**

1. Why does the Supreme Court find that White lacked an expectation of privacy in the content of his conversations with Jackson? How do the facts in *White* differ from the facts in *Katz*? 2. Do you agree that for Fourth Amendment purposes that there is little difference between White talking to a government informant and White talking to a government informant who is recording or transmitting his statements? 3. What is Justice Douglas’s central point in his dissent?

# Case of *United States v. Jones*

UNITED STATES V. JONES

___U.S.____(2012)

Scalia, J.

**Issue**We decide whether the attachment of a Global-Positioning-System (GPS**)** tracking device to an individual's vehicle, and subsequent use of that device to monitor the vehicle's movements on public streets, constitutes a search or seizure within the meaning of the Fourth Amendment.

**Facts**
In 2004 respondent Antoine Jones, owner and operator of a nightclub in the District of Columbia, came under suspicion of trafficking in narcotics and was made the target of an investigation by a joint FBI and Metropolitan Police Department task force. Officers employed various investigative techniques, including visual surveillance of the nightclub, installation of a camera focused on the front door of the club, and a pen register and wiretap covering Jones's cellular phone.
 Based in part on information gathered from these sources, in 2005 the Government applied to the United States District Court for the District of Columbia for a warrant authorizing the use of an electronic tracking device on the Jeep Grand Cherokee registered to Jones's wife. A warrant issued, authorizing installation of the device in the District of Columbia and within  0 days.
 On the 11th day, and not in the District of Columbia but in Maryland, agents installed a GPS tracking device on the undercarriage of the Jeep while it was parked in a public parking lot. Over the next 28 days, the Government used the device to track the vehicle's movements, and once had to replace the device's battery when the vehicle was parked in a different public lot in Maryland. By means of signals from multiple satellites, the device established the vehicle's location within 50 to 100 feet, and communicated that location by cellular phone to a Government computer. It relayed more than 2,000 pages of data over the 4-week period.
 The Government ultimately obtained a multiple-count indictment charging Jones and several alleged co-conspirators with, as relevant here, conspiracy to distribute and possess with intent to distribute five kilograms or more of cocaine and 50 grams or more of cocaine base, in violation of 21 U. S. C. §§841 and 846. Before trial, Jones filed a motion to   suppress evidence obtained through the GPS device. The District Court granted the motion only in part, suppressing the data obtained while the vehicle was parked in the garage adjoining Jones's residence. It held the remaining data admissible, because "'[a] person traveling in an automobile on public thoroughfares has no reasonable expectation of privacy in his movements from one place to another.'" Jones's trial in October 2006 produced a hung jury on the conspiracy count.
 In March 2007, a grand jury returned another indictment, charging Jones and others with the same conspiracy. The Government introduced at trial the same GPS-derived locational data admitted in the first trial, which connected Jones to the alleged conspirators' stash house that contained $ 850,000 in cash, 97 kilograms of cocaine, and 1 kilogram of cocaine base. The jury returned a guilty verdict, and the District Court sentenced Jones to life imprisonment.
 The United States Court of Appeals for the District of Columbia Circuit reversed the conviction because of admission of the evidence obtained by warrantless use of the GPS device which, it said, violated the Fourth Amendment. The Court noted that the warrant had not been executed within ten days and that the device was installed in Maryland rather than in the District of Columbia.

**Reasoning**The Fourth Amendment provides in relevant part that "[t]he right of the people to be secure in their persons, houses, papers, and effects, against unreasonable searches and seizures, shall not be violated." It is beyond dispute that a vehicle is an "effect" as that term is used in the Amendment. We hold that the Government's installation of a GPS device on a target's vehicle, and its use of that device to monitor the vehicle's movements, constitutes a "search."
 It is important to be clear about what occurred in this case: The Government physically occupied private property for the purpose of obtaining information. We have no doubt that such a physical intrusion would have been considered a "search" within the meaning of the Fourth Amendment when it was adopted. ….The text of the Fourth Amendment reflects its close connection to property, since otherwise it would have referred simply to "the right of the people to be secure against unreasonable searches and seizures"; the phrase "in their persons, houses, papers, and effects" would have been superfluous.
 Consistent with this understanding, our Fourth Amendment jurisprudence was tied to common-law trespass, at least until the latter half of the 20th century. Thus, in *Olmstead v. United States*, we held that wiretaps attached to telephone wires on the public streets did not constitute a Fourth Amendment search because "[t]here was no entry of the houses or offices of the defendants."
 Our later cases, of course, have deviated from that exclusively property-based approach. In *Katz v. United States*, we said that "the Fourth Amendment protects people, not places," and  found a violation in attachment of an eavesdropping device to a public telephone booth. Our later cases have applied the analysis of Justice Harlan's concurrence in that case, which said that a violation occurs when government officers violate a person's "reasonable expectation of privacy."
 The Government contends that the Harlan standard shows that no search occurred here, since Jones had no "reasonable expectation of privacy" in the area of the Jeep accessed by Government agents (its underbody) and in the locations of the Jeep on the public roads, which were visible to all. But we need not address the Government's contentions, because Jones's Fourth Amendment rights do not rise or fall with the *Katz* formulation. At bottom, we must "assur[e] preservation of that degree of privacy against government that existed when the Fourth Amendment was adopted." As explained, for most of our history the Fourth Amendment was understood to embody a particular concern for government trespass upon the areas ("persons, houses,  papers, and effects") it enumerates. *Katz* did not repudiate that understanding. Less than two years later the Court upheld defendants' contention that the Government could not introduce against them conversations between other people obtained by warrantless placement of electronic surveillance devices in their homes. The opinion rejected the dissent's contention that there was no Fourth Amendment violation "unless the conversational privacy of the homeowner himself is invaded." *Alderman v. United States*, 394 U. S. 165 (1969). "[W]e [do not] believe that *Katz*, by holding that the Fourth Amendment protects persons and their private conversations, was intended to withdraw any of the protection which the Amendment extends to the home ... "
 As Justice Brennan explained … *Katz* did not erode the principle "that, when the Government does engage in physical intrusion of a constitutionally protected area in order to obtain information, that intrusion may constitute a violation of the Fourth Amendment." We have embodied that preservation of past rights in our very definition of "reasonable expectation of privacy" which we have said to be an expectation "that has a source outside of the Fourth Amendment, either by reference to concepts of real or personal property law or to understandings that are recognized and permitted by society." …
 The concurrence begins by accusing us of applying "18th-century tort law." That is a distortion. What we apply is an 18th-century guarantee against unreasonable searches, which we believe must provide at a minimum the degree of protection it afforded when it was adopted. The concurrence does not share that belief. It would apply exclusively *Katz's* reasonable-expectation-of-privacy test, even when that eliminates rights that previously existed. …
 In fact, it is the concurrence's insistence on the exclusivity of the *Katz* test that needlessly leads us into "particularly vexing problems" in the present case. This Court has to date  not deviated from the understanding that mere visual observation does not constitute a search. …."Traditional surveillance" of Jones for a 4-week period "would have required a large team of agents, multiple vehicles, and perhaps aerial assistance," our cases suggest that such visual observation is constitutionally permissible. It may be that achieving the same result through electronic means, without an accompanying trespass, is an unconstitutional invasion of privacy, but the present case does not require us to answer that question.
 And answering it affirmatively leads us needlessly into additional thorny problems. The concurrence posits that "relatively short-term monitoring of a person's movements on public streets" is okay, but that "the use of longer term GPS monitoring in investigations of most offenses is no good. That introduces yet another  novelty into our jurisprudence. There is no precedent for the proposition that whether a search has occurred depends on the nature of the crime being investigated. And even accepting that novelty, it remains unexplained why a 4-week investigation is "surely" too long and why a drug-trafficking conspiracy involving substantial amounts of cash and narcotics is not an "extraordinary offens[e]" which may permit longer observation. What of a 2-day monitoring of a suspected purveyor of stolen electronics? Or of a 6-month monitoring of a suspected terrorist? We may have to grapple with these "vexing problems" in some future case where a classic trespassory search is not involved and resort must be had to *Katz* analysis; but there is no reason for rushing forward to resolve them here.

**Holding** The judgment of the Court of Appeals for the D. C. Circuit is affirmed.
**Sotomayor, J. concurring**

 The Fourth Amendment is not concerned only with trespassory intrusions on property. Rather, even in the absence of a trespass, "a Fourth Amendment search occurs when the government violates a subjective expectation of privacy that society recognizes as reasonable." In *Katz*, this Court enlarged its then-prevailing focus on property rights by announcing that the reach of the Fourth Amendment does not "turn upon the presence or absence of a physical intrusion." As the majority's opinion makes clear, however, *Katz's* reasonable-expectation-of-privacy test augmented, but did not displace or diminish, the common-law trespassory test that preceded it. Thus, "when the Government does engage in physical intrusion of a constitutionally protected area in order to obtain information, that intrusion may constitute a violation of the Fourth Amendment." Justice Alito’s approach, which discounts altogether the constitutional relevance of the Government's physical intrusion on Jones' Jeep, erodes that longstanding protection for privacy expectations inherent in items of property that people possess or control. By contrast, the trespassory test applied in the majority's opinion reflects an irreducible constitutional minimum: When the Government physically invades personal property to gather information, a search occurs. The reaffirmation of that principle suffices to decide this case.
 Nonetheless, as Justice Alito notes, physical intrusion is now unnecessary to many forms of surveillance. With increasing regularity, the Government will be capable of duplicating the monitoring undertaken in this case by enlisting factory- or owner-installed vehicle tracking devices or GPS-enabled smart phones. In cases of electronic or other novel modes of surveillance that do not depend upon a physical invasion on property, the majority opinion's trespassory test may provide little guidance. But "[s]ituations involving merely the transmission of electronic signals without trespass would remain subject to *Katz* analysis." As Justice Alito incisively observes, the same technological advances that have made possible nontrespassory surveillance techniques will also affect the *Katz* test by shaping the evolution of societal privacy expectations. Under that rubric, I agree with Justice Alito that, at the very least, "longer term GPS monitoring in investigations of most offenses impinges on expectations of privacy."
 In cases involving even short-term monitoring, some unique attributes of GPS surveillance relevant to the *Katz* analysis will require particular attention. GPS monitoring generates a precise, comprehensive record of a person's public movements that reflects a wealth of detail about her familial, political, professional, religious, and sexual associations. "Disclosed in [GPS] data ... will be trips the indisputably private nature of which takes little imagination to conjure: trips to the psychiatrist, the plastic surgeon, the abortion clinic, the AIDS treatment center, the strip club, the criminal defense attorney, the by-the-hour motel, the union meeting, the mosque, synagogue or church, the gay bar and on and on." The Government can store such records and efficiently mine them for information years into the future. And because GPS monitoring is cheap in comparison to conventional surveillance techniques and, by design, proceeds surreptitiously, it evades the ordinary checks that constrain abusive law enforcement practices: "limited police resources and community hostility."
 Awareness that the Government may be watching chills associational and expressive freedoms. And the Government's unrestrained power to assemble data that reveal private aspects of identity is susceptible to abuse. The net result is that GPS monitoring--by making available at a relatively low cost such a substantial quantum of intimate information about any person whom the Government, in its unfettered discretion, chooses to track--may "alter the relationship  between citizen and government in a way that is inimical to democratic society."
 More fundamentally, it may be necessary to reconsider the premise that an individual has no reasonable expectation of privacy in information voluntarily disclosed to third parties. This approach is ill suited to the digital age, in which people reveal a great deal of information about themselves to third parties in the course of carrying out mundane tasks. People disclose the phone numbers that they dial or text to their cellular providers; the URLs that they visit and the e-mail addresses with which they correspond to their Internet service providers; and the books, groceries, and medications they purchase to online retailers. Perhaps, as Justice Alito notes, some people may find the "tradeoff" of privacy for convenience "worthwhile," or  come to accept this "diminution of privacy" as "inevitable,"and perhaps not. I for one doubt that people would accept without complaint the warrantless disclosure to the Government of a list of every Web site they had visited in the last week, or month, or year. But whatever the societal expectations, they can attain constitutionally protected status only if our Fourth Amendment jurisprudence ceases to treat secrecy as a prerequisite for privacy. I would not assume that all information voluntarily disclosed to some member of the public for a limited purpose is, for that reason alone, disentitled to Fourth Amendment protection.

**Alito, J. with whom Ginsburg, J., Breyer, J., and Kagan, J. join concurring**

This case requires us to apply the Fourth Amendment's prohibition of unreasonable searches and seizures to a 21st-century surveillance technique, the use of a Global Positioning System device to monitor a vehicle's movements for an extended period of time. Ironically, the Court has chosen to decide this case based on 18th-century tort law. By attaching a small GPS device to the underside of the vehicle that respondent drove, the law enforcement officers in this case engaged in conduct that might have provided grounds in 1791 for a suit for trespass to chattels. And for this reason, the Court concludes, the installation and use of the GPS device constituted a search.
 This holding, in my judgment, is unwise. It strains the language of the Fourth Amendment; it has little if any support in current Fourth Amendment case law; and it is highly artificial.
 I would analyze the question presented in this case by asking whether respondent's reasonable expectations of privacy were violated by the long-term monitoring of the movements of the vehicle he drove.
 The Fourth Amendment prohibits "unreasonable searches and seizures," and the Court makes very little effort to explain how the attachment or use of the GPS device fits within these terms. The Court does not contend that there was a seizure. A seizure of property occurs when there is "some meaningful interference with an individual's possessory interests in that property," and here there was none. Indeed, the success of the surveillance technique that the officers employed was dependent on the fact that the GPS did not interfere in any way with the operation of the vehicle, for if any such interference had been detected, the device might have been discovered.
 The Court does claim that the installation and use of the GPS constituted a search, but this conclusion is dependent on the questionable proposition that these two procedures cannot be separated for purposes of Fourth Amendment analysis. If these two procedures are analyzed separately, it is not at all clear from the Court's opinion why either should be regarded as a search. It is clear that the attachment of the GPS device was not itself a search; if the device had not functioned or if the officers had not used it, no information would have been obtained.
 The Court argues--and I agree--that "we must 'assur[e] preservation of that degree of privacy against government that existed when the Fourth Amendment was adopted.'" But it is almost impossible to think of late-18th-century situations that are analogous to what took place in this case. … The Court's reasoning in this case is very similar to that in the Court's early decisions involving wiretapping and electronic eavesdropping, namely, that a technical trespass followed by the gathering of evidence constitutes a search…. This trespass-based rule was repeatedly criticized. In *Olmstead*, Justice Brandeis wrote that it was "immaterial where the physical connection with the telephone wires was made." Although a private conversation transmitted by wire did not fall within the literal words of the Fourth Amendment, he argued, the Amendment should be understood as prohibiting "every unjustifiable intrusion by the government upon the privacy of the individual."
 *Katz v. United States* finally did away with the old approach, holding that a trespass was not required for a Fourth Amendment violation.
 Under this approach, as the Court later put it when addressing the relevance of a technical trespass, "an actual trespass is neither necessary nor sufficient to establish a constitutional violation.
 Disharmony  with a substantial body of existing case law is only one of the problems with the Court's approach in this case.
 I will briefly note several others. First, the Court's reasoning largely disregards what is really important (the use of a GPS for the purpose of long-term tracking) and instead attaches great significance to something that most would view as relatively minor (attaching to the bottom of a car a small, light object that does not interfere in any way with the car's operation). Attaching such an object is generally regarded as so trivial that it does not provide a basis for recovery under modern tort law. But under the Court's reasoning, this conduct may violate the Fourth Amendment. By contrast, if long-term monitoring can be accomplished without committing a technical trespass--suppose, for example, that the Federal Government required or persuaded auto manufacturers to include a GPS tracking device in every car--the Court's theory would provide no protection.
 Second, the Court's approach leads to incongruous results. If the police attach   a GPS device to a car and use the device to follow the car for even a brief time, under the Court's theory, the Fourth Amendment applies. But if the police follow the same car for a much longer period using unmarked cars and aerial assistance, this tracking is not subject to any Fourth Amendment constraints.
 In the present case, the Fourth Amendment applies, the Court concludes, because the officers installed the GPS device after respondent's wife, to whom the car was registered, turned it over to respondent for his exclusive use. But if the GPS had been attached prior to that time, the Court's theory would lead to a different result…So if the GPS device had been installed before respondent's wife gave him the keys, respondent would have no claim for trespass--and, presumably, no Fourth Amendment claim either.
 Third, under the Court's theory, the coverage of the Fourth Amendment may vary from  State to State. If the events at issue here had occurred in a community property State or a State that has adopted the Uniform Marital Property Act, respondent would likely be an owner of the vehicle, and it would not matter whether the GPS was installed before or after his wife turned over the keys. In non-community-property States, on the other hand, the registration of the vehicle in the name of respondent's wife would generally be regarded as presumptive evidence that she was the sole owner.
 Fourth, the Court's reliance on the law of trespass will present particularly vexing problems in cases involving surveillance that is carried out by making electronic, as opposed to physical, contact with the item to be tracked. For example, suppose that the officers in the present case had followed respondent by surreptitiously activating a stolen vehicle detection system that came with the car when it was purchased. Would the sending of a radio signal to activate this  system constitute a trespass to chattels?...
 The Katz expectation-of-privacy test avoids the problems and complications noted above, but it is not without its own difficulties. It involves a degree of circularity and judges are apt to confuse their own expectations of privacy with those of the hypothetical reasonable person to which the *Katz* test looks. In addition, the *Katz* test rests on the assumption that this hypothetical reasonable person has a well-developed and stable set of privacy expectations. But technology can change those expectations. Dramatic technological change may lead to periods in which popular expectations are in flux and may ultimately produce significant changes in popular attitudes. New technology may provide increased convenience or security at the expense of privacy, and many people may find the tradeoff worthwhile. And even if the public does not welcome the diminution of privacy that new technology entails, they may eventually reconcile themselves to this development as inevitable. …
 Recent years have seen the emergence of many new devices that permit the monitoring of a person's movements. In some locales, closed-circuit television video monitoring is becoming ubiquitous. On toll roads, automatic toll collection systems create a precise record of the movements of motorists who choose to make use of that convenience. Many motorists purchase cars that are equipped with devices that permit a central station to ascertain the car's location at any time so that roadside assistance may be provided if needed and the car may be found if it is stolen.
 Perhaps most significant, cell phones and other wireless devices now permit wireless carriers to track and record the location of users--and as of June 2011, it has been reported, there were more than 322 million wireless devices in use in the United States. For older phones, the accuracy of the location information depends on the density of the tower network, but new "smart phones," which are equipped with a GPS device, permit more precise tracking. For example, when a user activates the GPS on such a phone, a provider is able to monitor the phone's location and speed of movement and can then report back real-time traffic conditions after combining ("crowdsourcing") the speed of all such phones on any particular road. Similarly, phone-location-tracking services are offered as "social" tools, allowing consumers to find (or to avoid) others who enroll in these services. The availability and use of these and other new devices will continue to shape the average person's expectations about the privacy of his or her daily movements.
 In the pre-computer age, the greatest protections of privacy were neither constitutional nor statutory, but practical. Traditional surveillance for any extended period of time was difficult and costly and therefore rarely under- taken. The surveillance at issue in this case--constant monitoring of the location of a vehicle for four weeks--would have required a large team of agents, multiple vehicles, and perhaps aerial assistance. Only an investigation of unusual importance could have justified such an expenditure of law enforcement resources. Devices like the one used in the present case, however, make long-term monitoring relatively easy and cheap. …The best that we can do in this case is to apply existing Fourth Amendment doctrine and to ask whether the use of GPS tracking in a particular case involved a degree of intrusion that a reasonable person would not have anticipated.
 Under this approach, relatively short-term monitoring of a person's movements on public streets accords with expectations of privacy that our society has recognized as reasonable. But the use of longer term GPS monitoring in investigations of most offenses impinges on expectations of privacy. For such offenses, society's expectation has been that law enforcement agents and others would not--and indeed, in the main, simply could not secretly monitor and catalogue every single movement of an individual's car for a very long period. In this case, for four weeks, law enforcement agents tracked every movement that respondent made in the vehicle he was driving. We need not identify with precision the point at which the tracking of this vehicle became a search, for the line was surely crossed before the 4-week mark. Other cases may present more difficult questions. But where uncertainty exists with respect to whether a certain period of GPS surveillance is long enough to constitute a Fourth Amendment search, the police may always seek a warrant. We also need not consider whether  prolonged GPS monitoring in the context of investigations involving extraordinary offenses would similarly intrude on a constitutionally protected sphere of privacy. In such cases, long-term tracking might have been mounted using previously available techniques.

**Questions for Discussion**

1. Discuss the reason why Justice Scalia holds that the installation of the GPS device was unconstitutional. Why is he reluctant to rely on an “expectation of privacy approach?” 2. How does Justice Sotomayor distinguish between searches that should be analyzed relying on a “trespassory approach” and searches that should be analyzed under an expectation of “privacy approach.” What future threats to individual privacy does she believe may be posed by electronic governmental surveillance? 3. Why is Justice Alito critical of Justice Scalia’s reliance on a “trespassory approach?” 4. Explain the reason that Justice Alito finds that the GPS violated Jones’s Fourth Amendment rights?

# DID QUON HAVE A REASONABLE EXPECTATION OF PRIVACY IN HIS TEXT MESSAGE?

*CITY OF ONTARIO V. QUON*

___U.S.____ (2010)

Kennedy, J.

**Issue**

This case involves the assertion by a government employer of the right, in circumstances to be described, to read text messages sent and received on a pager the employer owned and issued to an employee. The employee contends that the privacy of the messages is protected by the ban on "unreasonable searches and seizures" found in the Fourth Amendment to the United States Constitution, made applicable to the States by the Due Process Clause of the Fourteenth Amendment. Though the case touches issues of far-reaching significance, the Court concludes it can be resolved by settled principles  determining when a search is reasonable.

**Facts**The City of Ontario (City) is a political subdivision of the State of California. The case arose out of incidents in 2001 and 2002 when respondent Jeff Quon was employed by the Ontario Police Department (OPD). He was a police sergeant and member of OPD's Special Weapons and Tactics (SWAT) Team. The City, OPD, and OPD's Chief, Lloyd Scharf, are petitioners here. As will be discussed, two respondents share the last name Quon. In this opinion "Quon" refers to Jeff Quon, for the relevant events mostly revolve around him.
 In October 2001, the City acquired 20 alphanumeric pagers capable of sending and receiving text messages. Arch Wireless Operating Company provided wireless service for the pagers. Under the City's service contract with Arch Wireless, each pager was allotted a limited number of characters sent or received each month. Usage in excess of that amount would result in an additional fee. The City issued pagers to Quon and other SWAT Team members in order to help the SWAT Team mobilize and respond to emergency situations.
 Before acquiring the pagers, the City announced a "Computer Usage, Internet and E-Mail Policy" (Computer Policy) that  applied to all employees. Among other provisions, it specified that the City "reserves the right to monitor and log all network activity including e-mail and Internet use, with or without notice. Users should have no expectation of privacy or confidentiality when using these resources." In March 2000, Quon signed a statement acknowledging that he had read and understood the Computer Policy.
 The Computer Policy did not apply, on its face, to text messaging. Text messages share similarities with e-mails, but the two differ in an important way. In this case, for instance, an e-mail sent on a City computer was transmitted through the City's own data servers, but a text message sent on one of the City's pagers was transmitted using wireless radio frequencies from an individual pager to a receiving station owned by Arch Wireless. It was routed through Arch Wireless' computer network, where it remained until the recipient's pager or cellular telephone was ready to receive the message, at which point Arch Wireless transmitted the message from the transmitting station nearest to the recipient. After delivery, Arch Wireless retained a copy on its computer servers.  The message did not pass through computers owned by the City.
 Although the Computer Policy did not cover text messages by its explicit terms, the City made clear to employees, including Quon, that the City would treat text messages the same way as it treated e-mails. At an April 18, 2002, staff meeting at which Quon was present, Lieutenant Steven Duke, the OPD officer responsible for the City's contract with Arch Wireless, told officers that messages sent on the pagers "are considered e-mail messages. This means that [text] messages would fall under the City's policy as public information and [would be] eligible for auditing." Duke's comments were put in writing in a memorandum sent on April 29, 2002, by Chief Scharf to Quon and other City personnel.
 Within the first or second billing cycle after the pagers were distributed, Quon exceeded his monthly text message character allotment. Duke told Quon about the overage, and reminded him that messages sent on the pagers were "considered e-mail and could be audited." Duke said, however, that "it was not his intent to audit [an] employee's text messages to see if the overage [was] due to work related transmissions." Duke suggested that Quon could reimburse the City for the overage fee rather than have Duke audit the messages. Quon wrote a check to the City for the overage. Duke offered the same arrangement to other employees who incurred overage fees.
 Over the next few months, Quon exceeded his character limit three or four times. Each time he reimbursed the City. Quon and another officer again incurred overage fees for their pager usage in August 2002. At a meeting in October, Duke told Scharf that he had become "'tired of being a bill collector.'" Scharf decided to determine whether the existing character limit was too low -- that is, whether officers such as Quon were having to pay fees for sending work-related messages -- or if the overages were for personal messages. Scharf told Duke to request transcripts of text messages sent in August and September by Quon and the other employee who had exceeded the character allowance.
 At Duke's request, an administrative assistant employed by OPD contacted Arch Wireless. After verifying that the City was the subscriber on the accounts, Arch Wireless provided the desired transcripts. Duke reviewed the transcripts and discovered that many of  messages sent and received on Quon's pager were not work related, and some were sexually explicit. Duke reported his findings to Scharf, who, along with Quon's immediate supervisor, reviewed the transcripts himself. After his review, Scharf referred the matter to OPD's internal affairs division for an investigation into whether Quon was violating OPD rules by pursuing personal matters while on duty.
 The officer in charge of the internal affairs review was Sergeant Patrick McMahon. Before conducting a review, McMahon used Quon's work schedule to redact the transcripts in order to eliminate any messages Quon sent while off duty. He then reviewed the content of the messages Quon sent during work hours. McMahon's report noted that Quon sent or received 456 messages during work hours in the month of August 2002, of which no more than 57 were work related; he sent as many as 80 messages during a single day at work; and on an average workday, Quon sent or received 28 messages, of which only 3 were related to police business. The report concluded that Quon had violated OPD rules. Quon was allegedly disciplined.
 Raising claims under 42 U.S.C. Section 1983; 18 U.S.C. Section 2701 *et seq.*,   popularly known as the Stored Communications Act (SCA); and California law, Quon filed suit against petitioners in the United States District Court for the Central District of California. Arch Wireless and an individual not relevant here were also named as defendants. Quon was joined in his suit by another plaintiff who is not a party before this Court and by the other respondents, each of whom exchanged text messages with Quon during August and September 2002: Jerilyn Quon, Jeff Quon's then-wife, from whom he was separated; April Florio, an OPD employee with whom Jeff Quon was romantically involved; and Steve Trujillo, another member of the OPD SWAT Team. Among the allegations in the complaint was that petitioners violated respondents' Fourth Amendment rights and the SCA by obtaining and reviewing the transcript of Jeff Quon's pager messages and that Arch Wireless had violated the SCA by turning over the transcript to the City.
 The parties filed cross-motions for summary judgment. The District Court granted Arch Wireless' motion for summary judgment on the SCA claim but denied petitioners' motion for summary judgment on the Fourth Amendment claims. Relying on the plurality opinion in *O'Connor* v. *Ortega*, 480 U.S. 709 (1987), the District Court determined that Quon had a reasonable expectation of privacy in the content of his text messages. Whether the audit of the text messages was nonetheless reasonable, the District Court concluded, turned on Chief Scharf's intent: "[I]f the purpose for the audit was to determine if Quon was using his pager to 'play games' and 'waste time,' then the audit was not constitutionally reasonable"; but if the audit's purpose "was to determine the efficacy of the existing character limits to ensure that officers were not paying hidden work-related costs, . . . no constitutional violation occurred."
 The District Court held a jury trial to determine the purpose of the audit. The jury concluded that Scharf ordered the audit to determine the efficacy of the character limits. The District Court accordingly held that petitioners did not violate the Fourth Amendment. It entered judgment in their favor.
 The United States Court of Appeals for the Ninth Circuit reversed in part. The panel agreed with the District Court that Jeff Quon had a reasonable expectation of privacy in his text messages but disagreed with the District Court about whether the search was reasonable. Even though the search was conducted for "a legitimate work-related rationale," the Court of Appeals concluded, it "was not reasonable in scope." The panel disagreed with the District Court's observation that "there were no less-intrusive means" that Chief Scharf could have used "to verify the efficacy of the 25,000 character limit . . . without intruding on [respondents'] Fourth Amendment rights." The opinion pointed to a "host of simple ways" that the chief could have used instead of the audit, such as warning Quon at the beginning of the month that his future messages would be audited, or asking Quon himself to redact the transcript of his messages. The Court of Appeals further concluded that Arch Wireless had violated the SCA by turning over the transcript to the City. The Ninth Circuit denied a petition for rehearing en banc. Judge Ikuta, joined by six other Circuit Judges, dissented.Judge Wardlaw concurred in the denial of rehearing, defending the panel's opinion against the dissent. This Court granted the petition for certiorari filed by the City, OPD, and Chief Scharf challenging the Court of Appeals' holding that they violated the Fourth Amendment. The petition for certiorari filed by Arch Wireless challenging the Ninth Circuit's ruling that Arch Wireless violated the SCA was denied.

**Reasoning**

The Fourth Amendment states: "The right of the people to be secure in their persons, houses, papers, and effects, against unreasonable searches and seizures, shall not be violated . . . ." It is well settled that the Fourth Amendment's protection extends beyond the sphere of criminal investigations. The Amendment guarantees the privacy, dignity, and security of persons against certain arbitrary and invasive acts by officers of the Government," without regard to whether the government actor is investigating crime or performing another function. The Fourth Amendment applies as well when the Government acts in its capacity as an employer.
 The Court discussed this principle in *O'Connor.* There a physician employed by a state hospital alleged that hospital officials investigating workplace misconduct had violated his Fourth Amendment rights by searching his office and seizing personal items from his desk and filing cabinet. All Members of the Court agreed with the general principle that "[i]ndividuals do not lose Fourth Amendment rights merely because they work for the government instead of a private employer." A majority of the Court further agreed that "'special needs, beyond the normal need for law enforcement,'" make the warrant and probable-cause requirement impracticable for government employers.
 The *O'Connor* Court did disagree on the proper analytical framework for Fourth Amendment claims against government  employers. A four-Justice plurality concluded that the correct analysis has two steps. First, because "some government offices may be so open to fellow employees or the public that no expectation of privacy is reasonable,"a court must consider "[t]he operational realities of the workplace" in order to determine whether an employee's Fourth Amendment rights are implicated. On this view, "the question whether an employee has a reasonable expectation of privacy must be addressed on a case-by-case basis." Next, where an employee has a legitimate privacy expectation, an employer's intrusion on that expectation "for noninvestigatory, work-related purposes, as well as for investigations of work-related misconduct, should be judged by the standard of reasonableness under all the circumstances."
 Justice Scalia, concurring in the judgment, outlined a different approach. His opinion would have dispensed with an inquiry into "operational realities" and would conclude "that the offices of government employees . . . are covered by Fourth Amendment protections as a general matter." But he would also have held "that government searches  to retrieve work-related materials or to investigate violations of workplace rules -- searches of the sort that are regarded as reasonable and normal in the private-employer context -- do not violate the Fourth Amendment."
 Later, in the *Von Raab* decision, the Court explained that "operational realities" could diminish an employee's privacy expectations, and that this diminution could be taken into consideration when assessing the reasonableness of a workplace search. In the two decades since *O'Connor*, however, the threshold test for determining the scope of an employee's Fourth Amendment rights has not been clarified further. Here, though they disagree on whether Quon had a reasonable expectation of privacy, both petitioners and respondents start from the premise that the *O'Connor* plurality controls. It is not necessary to resolve whether that premise is correct. The case can be decided by determining that the search was reasonable even assuming Quon had a reasonable expectation of privacy. The two *O'Connor* approaches -- the plurality's and Justice Scalia’s -- therefore lead to the same result here.
 Before turning to the reasonableness of the search, it is instructive to note the parties' disagreement over whether Quon had a reasonable expectation of privacy. The record does establish that OPD, at the outset, made it clear that pager messages were not considered private. The City's Computer Policy stated that "[u]sers should have no expectation of privacy or confidentiality when using" city computers. Chief Scharf's memo and Duke's statements made clear that this official policy extended to text messaging. The disagreement, at least as respondents see the case, is over whether Duke's later statements overrode the official policy. Respondents contend that because Duke told Quon that an audit would be unnecessary if Quon paid for the overage, Quon reasonably could expect that the contents of his messages would remain private.
 At this point, were we to assume that inquiry into "operational realities" were called for, it would be necessary to ask whether Duke's statements could be taken as announcing a change in OPD policy, and if so, whether he had, in fact, the authority to make such a change and to guarantee the privacy of text messaging. It would also be necessary to consider whether a review of messages sent on police pagers, particularly those sent while officers are on duty, might be justified for other reasons, including performance evaluations, litigation concerning the lawfulness of police actions, and perhaps compliance with state open records laws. These matters would all bear on the legitimacy of an employee's privacy expectation.
 The Court must proceed with care when considering the whole concept of privacy expectations in communications made on electronic equipment owned by a government employer. The judiciary risks error by elaborating too fully on the Fourth Amendment implications of emerging technology before its role in society has become clear. In *Katz*, the Court relied on its own knowledge and experience to conclude that there is a reasonable expectation of privacy in a telephone booth. It is not so clear that courts at present are on so sure a ground. Prudence counsels caution before the facts in the instant case are used to establish far-reaching premises that define the existence, and extent, of privacy expectations enjoyed by employees when using employer-provided communication devices.
 Rapid changes in the dynamics of communication and information transmission are evident not just in the technology itself but in what society accepts as proper behavior. As one *amici* brief notes, many employers expect or at least tolerate personal use of such equipment by employees because it often increases worker efficiency. Another *amicus* points out that the law is beginning to respond to these developments, as some States have recently passed statutes requiring employers to notify employees when monitoring their electronic communications. At present,  it is uncertain how workplace norms, and the law's treatment of them, will evolve.
 Even if the Court were certain that the *O'Connor* plurality's approach were the right one, the Court would have difficulty predicting how employees' privacy expectations will be shaped by those changes or the degree to which society will be prepared to recognize those expectations as reasonable. Cell phone and text message communications are so pervasive that some persons may consider them to be essential means or necessary instruments for self-expression, even self-identification. That might strengthen the case for an expectation of privacy. On the other hand, the ubiquity of those devices has made them generally affordable, so one could counter that employees who need cell phones or similar devices for personal matters can purchase and pay for their own. And employer policies concerning communications will of course shape the reasonable expectations of their employees, especially to the extent that such policies are clearly communicated.
 A broad holding concerning employees' privacy expectations vis-a-vis employer-provided technological equipment might have implications for future  cases that cannot be predicted. It is preferable to dispose of this case on narrower grounds. For present purposes we assume several propositions *arguendo:* First, Quon had a reasonable expectation of privacy in the text messages sent on the pager provided to him by the City; second, petitioners' review of the transcript constituted a search within the meaning of the Fourth Amendment; and third, the principles applicable to a government employer's search of an employee's physical office apply with at least the same force when the employer intrudes on the employee's privacy in the electronic sphere.
 Even if Quon had a reasonable expectation of privacy in his text messages, petitioners did not necessarily violate the Fourth Amendment by obtaining and reviewing the transcripts. Although as a general matter, warrantless searches "are *per se* unreasonable under the Fourth Amendment," there are "a few specifically established and well-delineated exceptions" to that general rule. The Court has held that the "'special needs'" of the workplace justify one such exception.
 Under the approach of the *O'Connor* plurality, when conducted for a "noninvestigatory, work-related purpos[e]" or for the "investigatio[n] of work-related misconduct," a government employer's warrantless search is reasonable if it is "'justified at its inception'" and if "'the measures adopted are reasonably related to the objectives of the search and not excessively intrusive in light of'" the circumstances giving rise to the search. The search here satisfied the standard of the *O'Connor* plurality and was reasonable under that approach.
 The search was justified at its inception because there were "reasonable grounds for suspecting that the search [was] necessary for a noninvestigatory work-related purpose." As a jury found, Chief Scharf ordered the search in order to determine whether the character limit on the City's contract with Arch Wireless was sufficient to meet the City's needs. This was, as the Ninth Circuit noted, a "legitimate work-related rationale." The City and OPD had a legitimate interest in ensuring that employees were not being forced to pay out of their own pockets for work-related expenses, or on the other hand that the City was not paying for extensive personal communications.
 As for the scope of the search, reviewing the transcripts was reasonable because it was an efficient and expedient way to determine whether Quon's overages were the result of work-related messaging or personal use. The review was also not "'excessively intrusive.'" Although Quon had gone over his monthly allotment a number of times, OPD requested transcripts for only the months of August and September 2002. While it may have been reasonable as well for OPD to review transcripts of all the months in which Quon exceeded his allowance, it was certainly reasonable for OPD to review messages for just two months in order to obtain a large enough sample to decide whether the character limits were efficacious. And it is worth noting that during his internal affairs investigation, McMahon redacted all messages Quon sent while off duty, a measure which reduced the intrusiveness of any further review of the transcripts.

 Furthermore, and again on the assumption that Quon had a reasonable expectation of privacy in the contents of his messages, the extent of an expectation is relevant to assessing whether the search was too intrusive. Even if he could assume some level of privacy would inhere in his messages, it would not have been reasonable for Quon to conclude that his messages were in all circumstances immune from scrutiny. Quon was told that his messages were subject to auditing. As a law enforcement officer, he would or should have known that his actions were likely to come under legal scrutiny, and that this might entail an analysis of his on-the-job communications. Under the circumstances, a reasonable employee would be aware that sound management principles might require the audit of messages to determine whether the pager was being appropriately used. Given that the City issued the pagers to Quon and other SWAT Team members in order to help them more quickly respond to crises -- and given that Quon had received no assurances of privacy -- Quon could have anticipated that it might be necessary for the City to audit pager messages to assess the SWAT Team's performance in particular emergency situations.
 From OPD's perspective, the fact that Quon likely had only a limited privacy expectation, with boundaries that we need not here explore, lessened the risk that the review would intrude on highly private details of Quon's life. OPD's audit of messages on Quon's employer-provided pager was not nearly as intrusive as a search of his personal e-mail account or pager, or a wiretap on his home phone line, would have been. That the search did reveal intimate details of Quon's life does not make it unreasonable, for under the circumstances a reasonable employer would not expect that such a review would intrude on such matters. The search was permissible in its scope.
 The Court of Appeals erred in finding the search unreasonable. It pointed to a "host of simple ways to verify the efficacy of the 25,000 character limit . . . without intruding on [respondents'] Fourth Amendment rights." The panel suggested that Scharf "could have warned Quon that for the month of September he was forbidden from using his pager for personal communications, and that the contents of all his messages would be reviewed to ensure the pager was used only for work-related purposes during that time frame. Alternatively, if [OPD] wanted to review past usage, it could have asked Quon to count the characters himself, or asked him to redact personal messages and grant permission to [OPD] to review the redacted transcript."
 This approach was inconsistent with controlling precedents. This Court has "repeatedly refused to declare that only the 'least intrusive' search practicable can be reasonable under the Fourth Amendment." That rationale "could raise insuperable barriers to the exercise of virtually all search-and-seizure powers," because "judges engaged in *post hoc* evaluations of government conduct can almost always imagine some alternative means by which the objectives of the government might have been accomplished." The analytic errors of the Court of Appeals in this case illustrate the necessity of this principle. Even assuming there were ways that OPD could have performed the search that would have been less  intrusive, it does not follow that the search as conducted was unreasonable.
 Respondents argue that the search was *per se* unreasonable in light of the Court of Appeals' conclusion that Arch Wireless violated the SCA by giving the City the transcripts of Quon's text messages. The merits of the SCA claim are not before us. But even if the Court of Appeals was correct to conclude that the SCA forbade Arch Wireless from turning over the transcripts, it does not follow that petitioners' actions were unreasonable. Respondents point to no authority for the proposition that the existence of statutory protection renders a search *per se* unreasonable under the Fourth Amendment. And the precedents counsel otherwise. Furthermore, respondents do not maintain that any OPD employee either violated the law him- or herself or knew or should have known that Arch Wireless, by turning over the transcript would have violated the law. The otherwise reasonable search by OPD is not rendered unreasonable by the assumption that Arch Wireless violated the SCA by turning over the transcripts.
 Because the search was motivated by a legitimate work-related purpose, and because it was not excessive in scope, the search was reasonable under the approach of the *O'Connor* plurality. For these same reasons -- that the employer had a legitimate reason for the search, and that the search was not excessively intrusive in light of that justification -- the Court also concludes that the search would be "regarded as reasonable and normal in the private-employer context" and would satisfy the approach of Justice Scalia’s The search was reasonable, and the Court of Appeals erred by holding to the contrary. Petitioners did not violate Quon's Fourth Amendment rights.
 Finally, the Court must consider whether the search violated the Fourth Amendment rights of Jerilyn Quon, Florio, and Trujillo, the respondents who sent text messages to Jeff Quon. Petitioners and respondents disagree whether a sender of a text message can have a reasonable expectation of privacy in a message  he knowingly sends to someone's employer-provided pager. It is not necessary to resolve this question in order to dispose of the case, however. Respondents argue that because "the search was unreasonable as to Sergeant Quon, it was also unreasonable as to his correspondents. They make no corollary argument that the search, if reasonable as to Quon, could nonetheless be unreasonable as to Quon's correspondents. In light of this litigating position and the Court's conclusion that the search was reasonable as to Jeff Quon, it necessarily follows that these other respondents cannot prevail.

**Holding**Because the search was reasonable, petitioners did not violate respondents' Fourth Amendment rights, and the court below erred by concluding otherwise. The judgment of the Court of Appeals for the Ninth Circuit is reversed, and the case is remanded for further proceedings consistent with this opinion.

**Scalia, J., concurring**

In this case, the proper threshold inquiry should be not whether the Fourth Amendment applies to messages on *public* employees' employer-issued  [*37] pagers, but whether it applies *in general* to such messages on employer-issued pagers. Here, however, there is no need to answer that threshold question. Even accepting at face value Quon's and his co-plaintiffs' claims that the Fourth Amendment applies to their messages, the city's search was reasonable, and thus did not violate the Amendment. Applying the Fourth Amendment to new technologies may sometimes be difficult, but when it is necessary to decide a case we have no choice. The Court's implication, that where electronic privacy is concerned we should decide less than we otherwise would (that is, less than the principle of law necessary to resolve the case and guide private action) -- or that we should hedge our bets by concocting case-specific standards or issuing opaque opinions -- is in my view indefensible. The-times-they-are-a-changin' is a feeble excuse for disregard of duty.

**Questions for Discussion**

1. The Court concludes that Quon had a reasonable expectation of privacy in the text messages. Why was the warrantless search of the text messages reasonable under the Fourth Amendment?

2. Why was it not reasonable for Quon to conclude that his messages “were in all circumstances immune from scrutiny.”

3. What is the significance of Justice Kennedy’s statement that the “Court must proceed with care when considering the whole concept of privacy expectations in communications made on electronic equipment owned by a government employer.”

# DO OPEN FIELDS SURRONDED BY NO TRESPASSING SIGNS RETAIN AN EXPECTATION OF PRIVACY?

*OLIVER V. UNITED STATES* 466 U.S. 170 (1984)

Powell, J.

**Issue**

The "open fields" doctrine …permits police officers to enter and search a field without a warrant. We granted certiorari…to clarify confusion that has arisen as to the continued vitality of the doctrine.

### Facts

Acting on reports that marihuana was being raised on the farm of petitioner Oliver, two narcotics agents of the Kentucky State Police went to the farm to investigate. Arriving at the farm, they drove past petitioner's house to a locked gate with a "No Trespassing" sign. A footpath led around one side of the gate. The agents walked around the gate and along the road for several hundred yards, passing a barn and a parked camper. At that point, someone standing in front of the camper shouted: "No hunting is allowed, come back up here." The officers shouted back that they were Kentucky State Police officers, but found no one when they returned to the camper. The officers resumed their investigation of the farm and found a field of marihuana over a mile from petitioner's home. Petitioner was arrested and indicted for "manufactur[ing]" a "controlled substance." After a pretrial hearing, the District Court suppressed evidence of the discovery of the marihuana field. Applying Katz v. United States, the court found that petitioner had a reasonable expectation that the field would remain private because petitioner "had done all that could be expected of him to assert his privacy in the area of farm that was searched." He had posted "No Trespassing" signs at regular intervals and had locked the gate at the entrance to the center of the farm. Further, the court noted that the field itself is highly secluded: it is bounded on all sides by woods, fences, and embankments and cannot be seen from any point of public access. The court concluded that this was not an "open" field that invited casual intrusion. The Court of Appeals for the Sixth Circuit … reversed the District Court. The court concluded that Katz, upon which the District Court relied, had not impaired the vitality of the open fields doctrine. Rather, the open fields doctrine was entirely compatible with Katz' emphasis on privacy. The court reasoned that the "human relations that create the need for privacy do not ordinarily take place" in open fields, and that the property owner's common-law right to exclude trespassers is insufficiently linked to privacy to warrant the Fourth Amendment's protection.
 In the second case before the court, after receiving an anonymous tip that marihuana was being grown in the woods behind respondent Thornton's residence, two police officers entered the woods by a path between this residence and a neighboring house. They followed a footpath through the woods until they reached two marihuana patches fenced with chicken wire. Later, the officers determined that the patches were on the property of respondent, obtained a warrant to search the property, and seized the marihuana. On the basis of this evidence, respondent was arrested and indicted.    The trial court granted respondent's motion to suppress the fruits of the second search. The warrant for this search was premised on information that the police had obtained during their previous warrantless search, that the court found to be unreasonable. "No Trespassing" signs and the secluded location of the marihuana patches evinced a reasonable expectation of privacy. Therefore, the court held, the open fields doctrine did not apply.

### Reasoning

### The rule announced in Hester v. United States was founded upon the explicit language of the Fourth Amendment. That Amendment indicates with some precision the places and things encompassed by its protections. As Justice Holmes explained for the Court in his characteristically laconic style: "[T]he special protection accorded by the Fourth Amendment to the people in their `persons, houses, papers, and effects,' is not extended to the open fields. The distinction between the latter and the house is as old as the common law." Nor are the open fields "effects" within the meaning of the Fourth Amendment. In this respect, it is suggestive that James Madison's proposed draft of what became the Fourth Amendment preserves "[t]he rights of the people to be secured in their persons, their houses, their papers, and their other property, from all unreasonable searches and seizures . . . ." Although Congress' revisions of Madison's proposal broadened the scope of the Amendment in some respects, the term "effects" is less inclusive than "property" and cannot be said to encompass open fields. We conclude, as did the Court in deciding Hester v. United States, that the government's intrusion upon the open fields is not one of those "unreasonable searches" proscribed by the text of the Fourth Amendment. In this light, the rule of Hester v. United States, that we reaffirm today, may be understood as providing that an individual may not legitimately demand privacy for activities conducted out of doors in fields, except in the area immediately surrounding the home. Open fields do not provide the setting for those intimate activities that the Amendment is intended to shelter from government interference or surveillance. There is no societal interest in protecting the privacy of those activities, such as the cultivation of crops, that occur in open fields. Moreover, as a practical matter these lands usually are accessible to the public and the police in ways that a home, an office, or commercial structure would not be. It is not generally true that fences or "No Trespassing" signs effectively bar the public from viewing open fields in rural areas. And both petitioner Oliver and respondent Thornton concede that the public and police lawfully may survey lands from the air. For these reasons, the asserted expectation of privacy in open fields is not an expectation that "society recognizes as reasonable."   The historical underpinnings of the open fields doctrine also demonstrate that the doctrine is consistent with respect for "reasonable expectations of privacy." As Justice Holmes, writing for the Court, observed in Hester,the common law distinguished "open fields" from the "curtilage," the land immediately surrounding and associated with the home. The distinction implies that only the curtilage, not the neighboring open fields, warrants the Fourth Amendment protections that attach to the home. At common law, the curtilage is the area to which extends the intimate activity associated with the "sanctity of a man's home and the privacies of life," and has been considered part of the home itself for Fourth Amendment purposes. Thus, courts have extended Fourth Amendment protection to the curtilage; and they have defined the curtilage, as did the common law, by reference to the factors that determine whether an individual reasonably may expect that an area immediately adjacent to the home will remain private. Conversely, the common law implies, as we reaffirm today, that no expectation of privacy legitimately attaches to open fields. We conclude, from the text of the Fourth Amendment and from the historical and contemporary understanding of its purposes, that an individual has no legitimate expectation that open fields will remain free from warrantless intrusion by government officers. Nor would a case-by-case approach provide a workable accommodation between the needs of law enforcement and the interests protected by the Fourth Amendment. Under this approach, police officers would have to guess before every search whether landowners had erected fences sufficiently high, posted a sufficient number of warning signs, or located contraband in an area sufficiently secluded to establish a right of privacy. The lawfulness of a search would turn on "`[a] highly sophisticated set of rules, qualified by all sorts of ifs, ands, and buts and requiring the drawing of subtle nuances and hairline distinctions . . . .'" This Court repeatedly has acknowledged the difficulties created for courts, police, and citizens by an ad hoc, case-by-case definition of Fourth Amendment standards to be applied in differing factual circumstances. The ad hoc approach not only makes it difficult for the policeman to discern the scope of his authorityit also creates a danger that constitutional rights will be arbitrarily and inequitably enforced. Initially, we reject the suggestion that steps taken to protect privacy establish that expectations of privacy in an open field are legitimate. It is true, of course, that petitioner Oliver and respondent Thornton, in order to conceal their criminal activities, planted the marihuana upon secluded land and erected fences and "No Trespassing" signs around the property. And it may be that because of such precautions, few members of the public stumbled upon the marihuana crops seized by the police. Neither of these suppositions demonstrates, however, that the expectation of privacy was legitimate in the sense required by the Fourth Amendment. The test of legitimacy is not whether the individual chooses to conceal assertedly "private" activity. Rather, the correct inquiry is whether the government's intrusion infringes upon the personal   and societal values protected by the Fourth Amendment. As we have explained, we find no basis for concluding that a police inspection of open fields accomplishes such an infringement. Holding We conclude that the open fields doctrine, as enunciated in Hester, is consistent with the plain language of the Fourth Amendment and its historical purposes. Moreover, Justice Holmes' interpretation of the Amendment in Hester accords with the "reasonable expectation of privacy" analysis developed in subsequent decisions of this Court.

Marshall, J., with whom Brennan, J. and Stevens J., join, **dissenting**  In each of these consolidated cases, police officers, ignoring clearly visible "No Trespassing" signs, entered upon private land in search of evidence of a crime. At a spot that could not be seen from any vantage point accessible to the public, the police discovered contraband, which was subsequently used to incriminate the owner of the land. In neither case did the police have a warrant authorizing their activities. The Court holds that police conduct of this sort does not constitute an "unreasonable search" within the meaning of the Fourth Amendment. The Court reaches that startling conclusion by two independent analytical routes. First, the Court argues that, because the Fourth Amendment by its terms renders people secure in their "persons, houses, papers, and effects," it is inapplicable to trespasses upon land not lying within the curtilage of a dwelling. Second, the Court contends that "an individual may not legitimately demand privacy for activities conducted out of doors in fields, except in the area immediately surrounding the home." Because I cannot agree with either of these propositions, I dissent.
 It is undisputed that Oliver and Thornton each owned the land into which the police intruded. That fact alone provides considerable support for their assertion of legitimate privacy interests in their woods and fields. But even more telling is the nature of the sanctions that Oliver and Thornton could invoke, under local law, for violation of their property rights. In Kentucky, a knowing entry upon fenced or otherwise enclosed land, or upon unenclosed land conspicuously posted with signs excluding the public, constitutes criminal trespass. The law in Maine is similar. An intrusion into "any place from which [the intruder] may lawfully be excluded and which is posted in a manner prescribed by law or in a manner reasonably likely to come to the attention of intruders or which is fenced or otherwise enclosed" is a crime. Thus, positive law not only recognizes the legitimacy of Oliver's and Thornton's insistence that strangers keep off their land, but subjects those who refuse to respect their wishes to the most severe of penalties - criminal liability. Under these circumstances, it is hard to credit the Court's assertion that Oliver's and Thornton's expectations of privacy were not of a sort that society is prepared to recognize as reasonable. Privately owned woods and fields that are not exposed to public view regularly are employed in a variety of ways that society acknowledges deserve privacy. Many landowners like to take solitary walks on their property, confident that they will not be confronted in their rambles by strangers or policemen. Others conduct agricultural businesses on their property. Some landowners use their secluded spaces to meet lovers, others to gather together with fellow worshippers, still others to engage in sustained creative endeavor. Private land is sometimes used as a refuge for wildlife, where flora and fauna are protected from human intervention of any kind. Our respect for the freedom of landowners to use their posted "open fields" in ways such as these partially explains the seriousness with which the positive law regards deliberate invasions of such spaces, and substantially reinforces the landowners' contention that their expectations of privacy are "reasonable." Whether a person "took normal precautions to maintain his privacy" in a given space affects whether his interest is one protected by the Fourth Amendment. The reason why such precautions are relevant is that we do not insist that a person who has a right to exclude others exercise that right. A claim to privacy is therefore strengthened by the fact that the claimant somehow manifested to other people.
 A clear, easily administrable rule emerges from the analysis set forth above: Private land marked in a fashion sufficient to render entry thereon a criminal trespass under the law of the State in which the land lies is protected by the Fourth Amendment's proscription of unreasonable searches and seizures. One of the advantages of the foregoing rule is that it draws upon a doctrine already familiar to both citizens and government officials. In each jurisdiction, a substantial body of statutory and case law defines the precautions a landowner must take in order to avail himself of the sanctions of the criminal law. The police know that body of law, because they are entrusted with responsibility for enforcing it against the public; it therefore would not be difficult for the police to abide by it themselves. By contrast, the doctrine announced by the Court today is incapable of determinate application. Police officers, making warrantless entries upon private land, will be obliged in the future to make on-the-spot judgments as to how far the curtilage extends, and to stay outside that zone. In addition, we may expect to see a spate of litigation over the question of how much improvement is necessary to remove private land from the category of "unoccupied or undeveloped area" to which the "open fields exception" is now deemed applicable. .

**Questions for Discussion**

1. Why do open fields lack a reasonable expectation of privacy? 2. What is the reason that the Supreme Court concludes that “no trespassing” signs do not create an expectation of privacy in open fields? 3. Are you persuaded by Justice Marshall’s argument that open fields under certain circumstances should be considered to retain an expectation of privacy.

# DOES CURTILAGE POSSESS AN EXPECTATION OF PRIVACY FROM AERIAL SURVEILLANCE?

*FLORIDA V. RILEY* 488 U.S. 4445 (1981)

White, J.

**Issue**

The Florida Supreme Court addressed the following question: "Whether surveillance of the interior of a partially covered greenhouse in a residential backyard from the vantage point of a helicopter located 400 feet above the greenhouse constitutes a `search' for which a warrant is required under the Fourth Amendment . The court answered the question in the affirmative, and we granted the State's petition for certiorari challenging that conclusion.

**Facts** Respondent Riley lived in a mobile home located on five acres of rural property. A greenhouse was located 10 to 20 feet behind the mobile home. Two sides of the greenhouse were enclosed. The other two sides were not enclosed but the contents of the greenhouse were obscured from view from surrounding property by trees, shrubs, and the mobile home. The greenhouse was covered by corrugated roofing panels, some translucent and some opaque. At the time relevant to this case, two of the panels, amounting to approximately 10% of the roof area, were missing. A wire fence surrounded the mobile home and the greenhouse, and the property was posted with a "DO NOT ENTER" sign. This case originated with an anonymous tip to the Pasco County Sheriff's office that marijuana was being grown on respondent's property. When an investigating officer discovered that he could not see the contents of the greenhouse from the road, he circled twice over respondent's property in a helicopter at the height of 400 feet. With his naked eye, he was able to see through the openings in the roof and one or more of the open sides of the greenhouse and to identify what he thought was marijuana growing in the structure. A warrant was obtained based on these observations, and the ensuing search revealed marijuana growing in the greenhouse. Respondent was charged with possession of marijuana under Florida law. The trial court granted his motion to suppress; the Florida Court of Appeals reversed but certified the case to the Florida Supreme Court, which quashed the decision of the Court of Appeals and reinstated the trial court's suppression order. **Reasoning**

As a general proposition, the police may see what may be seen "from a public vantage point where [they have] a right to be." Thus the police, like the public, would have been free to inspect the backyard garden from   the street if their view had been unobstructed. They were likewise free to inspect the yard from the vantage point of an aircraft flying in the navigable airspace as this plane was. "In an age where private and commercial flight in the public airways is routine, it is unreasonable for respondent to expect that his marijuana plants were constitutionally protected from being observed with the naked eye from an altitude of 1,000 feet. The Fourth Amendment simply does not require the police traveling in the public airways at this altitude to obtain a warrant in order to observe what is visible to the naked eye."

Riley no doubt intended and expected that his greenhouse would not be open to public inspection, and the precautions he took protected against ground-level observation. Because the sides and roof of his greenhouse were left partially open, however, what was growing in the greenhouse was subject to viewing from the air. Under the holding in Ciraolo, Riley could not reasonably have expected the contents of his greenhouse to be immune from examination by an officer seated in a fixed-wing aircraft flying in navigable airspace at an altitude of 1,000 feet or, as the Florida Supreme Court seemed to recognize, at an altitude of 500 feet, the lower limit of the navigable airspace for such an aircraft. Here, the inspection was made from a helicopter, but as is the case with fixed-wing planes, "private and commercial flight [by helicopter] in the public airways is routine" in this country, and there is no indication that such flights are unheard of in Pasco County, Florida. Riley could not reasonably have expected that his greenhouse was protected from public or official observation from a helicopter had it been flying within the navigable airspace for fixed-wing aircraft.
 Nor on the facts before us, does it make a difference for Fourth Amendment purposes that the helicopter was flying at 400 feet when the officer saw what was growing in the greenhouse through the partially open roof and sides of the structure. We would have a different case if flying at that altitude had been contrary to law or regulation. But helicopters are not bound by the lower limits of the navigable airspace allowed to other aircraft. Any member of the public could legally have been flying over Riley's property in a helicopter at the altitude of 400 feet and could have observed Riley's greenhouse. The police officer did no more. This is not to say that an inspection of the curtilage of a house from an aircraft will always pass muster under the Fourth Amendment simply because the plane is within the navigable airspace specified by law. But it is of obvious importance that the helicopter in this case was not violating the law, and there is nothing in the record or before us to suggest that helicopters flying at 400 feet are sufficiently rare in this country to lend substance to respondent's claim that he reasonably anticipated that his greenhouse would not be subject to observation from that altitude. Neither is there any intimation here that the helicopter interfered with respondent's normal use of the greenhouse or of other parts of the curtilage. As far as this record reveals, no intimate details connected with the use of the home or curtilage were observed, and there was no undue noise, and no wind, dust, or threat of injury. In these circumstances, there was no violation of the Fourth Amendment. The judgment of the Florida Supreme Court is accordingly reversed.

Brennan, J. with whom Marshall J. and Stevens J. join **dissent**ing

The Court holds today that police officers need not obtain a warrant based on probable cause before circling in a helicopter 400 feet above a home in order to investigate what is taking place behind the walls of the curtilage. I cannot agree that the Fourth Amendment to the Constitution, which safeguards "[t]he right of the people to be secure in their persons, houses, papers, and effects, against unreasonable searches and seizures," tolerates such an intrusion on privacy and personal security.

###

The plurality undertakes no inquiry into whether low-level helicopter surveillance by the police of activities in an enclosed backyard is consistent with the "aims of a free and open society." Instead, it summarily concludes that Riley's expectation of privacy was unreasonable because "[a]ny member of the public could legally have been flying over Riley's property in a helicopter at the altitude of 400 feet and could have observed Riley's greenhouse." This observation is, in turn, based solely on the fact that the police helicopter was within the airspace within which such craft are allowed by federal safety regulations to fly. I agree, of course, that "[w]hat a person knowingly exposes to the public . . . is not a subject of Fourth Amendment protection." But I cannot agree that one "knowingly exposes [an area] to the public" solely because a helicopter may legally fly above it. Under the plurality's exceedingly grudging Fourth Amendment theory, the expectation of privacy is defeated if a single member of the public could conceivably position herself to see into the area in question without doing anything illegal. It is defeated whatever the difficulty a person would have in so positioning herself, and however infrequently anyone would in fact do so. In taking this view the plurality ignores the very essence of Katz. The reason why there is no reasonable expectation of privacy in an area that is exposed to the public is that little diminution in "the amount of privacy and freedom remaining to citizens" will result from police surveillance of something that any passerby readily sees. To pretend, as the plurality opinion does, that the same is true when the police use a helicopter to peer over high fences is, at best, disingenuous. Notwithstanding the plurality's statistics about the number of helicopters registered in this country, can it seriously be questioned that Riley enjoyed virtually complete privacy in his backyard greenhouse, and that that privacy was invaded solely by police helicopter surveillance? Is the theoretical possibility that any member of the public (with sufficient means) could also have hired a helicopter and looked over Riley's fence of any relevance at all in determining whether Riley suffered a serious loss of privacy and personal security through the police action? The police officer positioned 400 feet above Riley's backyard was not, however, standing on a public road. The vantage point he enjoyed was not one any citizen could readily share. His ability to see over Riley's fence depended on his use of a very expensive and sophisticated piece of machinery to which few ordinary citizens have access. In such circumstances it makes no more sense to rely on the legality of the officer's position in the skies than it would to judge the constitutionality of the wiretap in Katz by the legality of the officer's position outside the telephone booth. The simple inquiry whether the police officer had the legal right to be in the position from which he made his observations cannot suffice, for we cannot assume that Riley's curtilage was so open to the observations of passersby in the skies that he retained little privacy or personal security to be lost to police surveillance. The question before us must be not whether the police were where they had a right to be, but whether public observation of Riley's curtilage was so commonplace that Riley's expectation of privacy in his backyard could not be considered reasonable. To say that an invasion of Riley's privacy from the skies was not impossible is most emphatically not the same as saying that his expectation of privacy within his enclosed curtilage was not "one that society is prepared to recognize as `reasonable.'"

**Questions for Discussion** 1. Why does Riley argue that the police search and seizure of the marijuana was unlawful? 2. Summarize the decision of the Supreme Court. 3. Are you persuaded by the argument of the dissent. 4. Would the precedent established in Riley permit the police to employ technology that permitted them to look inside Riley’s mobile home?

# Case of *Florida v. Jardines*

*FLORIDA V. JARDINES*

Scalia, J.
Issue
We consider whether using a drug-sniffing dog on a homeowner’s porch to investigate the contents of the home is a “search” within the meaning of the Fourth Amendment.

**Facts**In 2006, Detective William Pedraja of the Miami-Dade Police Department received an unverified tip that marijuana was being grown in the home of respondent Joelis Jardines. One month later, the Department and the Drug Enforcement Administration sent a joint surveillance team to Jardines’ home. Detective Pedraja was part of that team. He watched the home for fifteen minutes and saw no vehicles in the driveway or activity around the home, and could not see inside because the blinds were drawn. Detective Pedraja then approached Jardines’ home accompanied by Detective Douglas Bartelt, a trained canine handler who had just arrived at the scene with his drug-sniffing dog. The dog was trained to detect the scent of marijuana,  cocaine, heroin, and several other drugs, indicating the presence of any of these substances through particular behavioral changes recognizable by his handler.
 Detective Bartelt had the dog on a six-foot leash, owing in part to the dog’s “wild” nature, and tendency to dart around erratically while searching. As the dog approached Jardines’ front porch, he apparently sensed one of the odors he had been trained to detect, and began energetically exploring the area for the strongest point source of that odor. As Detective Bartelt explained, the dog “began tracking that airborne odor by . . . tracking back and forth,” engaging in what is called “bracketing,” “back and forth, back and forth.” Detective Bartelt gave the dog “the full six feet of the leash plus whatever safe distance [he could] give him” to do this—he testified that he needed to give the dog “as much distance as I can.” And Detective Pedraja stood back while this was occurring, so that he would not “get knocked over” when the dog was “spinning around trying to find” the source.
 After sniffing the base of the front door, the dog sat, which is the   trained behavior upon discovering the odor’s strongest point. Detective Bartelt then pulled the dog away from the door and returned to his vehicle. He left the scene after informing Detective Pedraja that there had been a positive alert for narcotics.
 On the basis of what he had learned at the home, Detective Pedraja applied for and received a warrant to search the residence. When the warrant was executed later that day, Jardines attempted to flee and was arrested; the search revealed marijuana plants, and he was charged with trafficking in cannabis.
 At trial, Jardines moved to suppress the marijuana plants on the ground that the canine investigation was an unreasonable search. The trial court granted the motion, and the Florida Third District Court of Appeal reversed. On a petition for discretionary review, the Florida Supreme Court quashed the decision of the Third District Court of Appeal and approved the trial court’s decision to suppress, holding (as relevant here) that the use of the trained narcotics dog to investigate Jardines’ home was a Fourth Amendment search unsupported by probable cause, rendering invalid the warrant based upon information gathered in that search..
**Reasoning**

The Fourth Amendment …establishes a simple baseline, one that for much of our history formed the exclusive basis for its protections: When “the Government obtains information by physically intruding” on persons, houses, papers, or effects, “a ‘search’ within the original meaning of the Fourth Amendment” has “undoubtedly occurred.” By reason of our decision in *Katz v. United States*, property rights “are not the sole measure of Fourth Amendment violations,” [)](http://www.lexis.com/research/buttonTFLink?_m=970b9cb843303eca77540688394b7d00&_xfercite=<cite cc%3D"USA"><!%5BCDATA%5B2013 U.S. LEXIS 2542%5D%5D><%2Fcite>&_butType=3&_butStat=2&_butNum=29&_butInline=1&_butinfo=<cite cc%3D"USA"><!%5BCDATA%5B506 U.S. 56%2C 64%5D%5D><%2Fcite>&_fmtstr=FULL&docnum=1&_startdoc=1&wchp=dGLzVzV-zSkAb&_md5=9d17c66db52048138e48e3e6f96347c0)but though *Katz* may add to the baseline, it does not subtract anything from the Amendment’s protections “when the Government *does* engage in [a] physical intrusion of a constitutionally protected area,”
 That principle renders this case a straightforward one. The officers were gathering information in an area belonging to Jardines and immediately surrounding his house—in the curtilage of the house, which we have held enjoys protection as part of the home itself. And they gathered that information by physically entering and occupying the area to engage in conduct not explicitly or implicitly permitted by the homeowner.
 The Fourth Amendment “indicates with some precision the places and things encompassed by its protections”: persons, houses, papers, and effects. The Fourth Amendment does not, therefore, prevent all investigations conducted on private property; for example, an officer may (subject to *Katz*) gather information in what we have called “open fields”—even if those fields are privately owned—because such fields are not enumerated in the Amendment’s text.

 But when it comes to the Fourth Amendment, the home is first among equals. At the Amendment’s “very core” stands “the right of a man to retreat into his own home and there be free from unreasonable   governmental intrusion.” This right would be of little practical value if the State’s agents could stand in a home’s porch or side garden and trawl for evidence with impunity; the right to retreat would be significantly diminished if the police could enter a man’s property to observe his repose from just outside the front window.
 We therefore regard the area “immediately surrounding and associated with the home”—what our cases call the curtilage—as “part of the home itself for Fourth Amendment purposes.” That principle has ancient and durable roots. Just as the distinction between the home and the open fields is “as old as the common law,” so too is the identity of home and what Blackstone called the “curtilage or homestall,” for the “house protects and privileges all its branches and appurtenants.” This area around the home is “intimately linked to the home, both physically and psychologically,” and is where “privacy expectations are most heightened.”
 While the boundaries  of the curtilage are generally “clearly marked,” the “conception defining the curtilage” is at any rate familiar enough that it is “easily understood from our daily experience.”. Here there is no doubt that the officers entered it: The front porch is the classic exemplar of an area adjacent to the home and “to which the activity of home life extends.”


 Since the officers’ investigation took place in a constitutionally protected area, we turn to the question of whether it was accomplished through an unlicensed physical intrusion. **[1](http://www.lexis.com/research/retrieve?_m=d3eb9619362328179a0e22d2dd60d641&csvc=bl&cform=byName&_fmtstr=FULL&docnum=1&_startdoc=1&wchp=dGLzVzV-zSkAb&_md5=d9c30937a3be03b8046bbfb8cde5b269" \l "fnote1)** While law enforcement officers need not “shield their eyes” when passing by the home “on public thoroughfares,” an officer’s leave to gather information is sharply circumscribed when he steps off those thoroughfares and enters the Fourth Amendment’s protected areas. In permitting, for example, visual observation of the home from “public navigable airspace,” we were careful to note that it was done “in a physically nonintrusive manner.” *Entick* v. *Carrington*, 2 Wils. K. B. 275, 95 Eng. Rep. 807 (K. B. 1765), a case “undoubtedly familiar” to “every American statesman” at the time of the Founding, states the general rule clearly: “[O]ur law holds the property of every man so sacred, that no man can set his foot upon his neighbour’s close without his leave.”. As it is undisputed that the detectives had all four of their feet and all four of their companion’s firmly planted on the constitutionally protected extension of Jardines’ home, the only question is whether he had given his leave (even implicitly) for them to do so. He had not.

“A license may be implied from the habits of the country,” notwithstanding the “strict rule of the English common law as to entry upon a close.” We have accordingly recognized that “the  knocker on the front door is treated as an invitation or license to attempt an entry, justifying ingress to the home by solicitors, hawkers and peddlers of all kinds.” This implicit license typically permits the visitor to approach the home by the front path, knock promptly, wait briefly to be received, and then (absent invitation to linger longer) leave. Complying with the terms of that traditional invitation does not require fine-grained legal knowledge; it is generally managed without incident by the Nation’s Girl Scouts and trick-or-treaters. **[2](http://www.lexis.com/research/retrieve?_m=d3eb9619362328179a0e22d2dd60d641&csvc=bl&cform=byName&_fmtstr=FULL&docnum=1&_startdoc=1&wchp=dGLzVzV-zSkAb&_md5=d9c30937a3be03b8046bbfb8cde5b269" \l "fnote2)** Thus, a police officer not armed with a warrant may approach a home and knock, precisely because that is “no more than any private citizen might do.”
 But introducing a trained police dog to explore the area around the home in hopes of discovering incriminating evidence is something else. There is no customary invitation to do that. An invitation to engage in canine forensic investigation assuredly does not inhere in the very act of hanging a knocker. **[3](http://www.lexis.com/research/retrieve?_m=d3eb9619362328179a0e22d2dd60d641&csvc=bl&cform=byName&_fmtstr=FULL&docnum=1&_startdoc=1&wchp=dGLzVzV-zSkAb&_md5=d9c30937a3be03b8046bbfb8cde5b269" \l "fnote3)** To find a visitor knocking on the door is routine (even if sometimes unwelcome); to spot that same visitor exploring the front path with a metal detector, or marching his bloodhound into the garden before saying hello and asking permission, would inspire most of us to—well, call the police. The scope of a license—express or implied—is limited not only to a particular area but also to a specific purpose. Consent at a traffic stop to an officer’s checking out an anonymous tip that there is a body in the trunk does not permit the officer to rummage through the trunk for narcotics.  Here, the background social norms that invite a visitor to the front door do not invite him there to conduct a search. **[4](http://www.lexis.com/research/retrieve?_m=d3eb9619362328179a0e22d2dd60d641&csvc=bl&cform=byName&_fmtstr=FULL&docnum=1&_startdoc=1&wchp=dGLzVzV-zSkAb&_md5=d9c30937a3be03b8046bbfb8cde5b269" \l "fnote4)**
 The State points to our decisions holding that the subjective intent of the officer is irrelevant.. But those cases merely hold that a stop or search *that is objectively reasonable* is not vitiated by the fact that the officer’s real reason for making the stop or search has nothing to do with the validating reason. Thus, the defendant will not be heard to complain that although he was speeding the officer’s real reason for the stop was racial harassment. Here, however, the question before the court is precisely *whether* the officer’s conduct was an objectively reasonable search. As  we have described, that depends upon whether the officers had an implied license to enter the porch, which in turn depends upon the purpose for which they entered. Here, their behavior objectively reveals a purpose to conduct a search, which is not what anyone would think he had license to do.
 The State argues that investigation by a forensic narcotics dog by definition cannot implicate any legitimate privacy interest. The State cites for authority our decision in *United States v. Place*, which held, respectively, that canine inspection of luggage in an airport, chemical testing of a substance that had fallen from a parcel in transit, and canine inspection of an automobile during a lawful traffic stop, do not violate the “reasonable expectation of privacy” described in *Katz.*
 Just last Term, we considered an argument much like this. *Jones* held that tracking an automobile’s whereabouts using a physically-mounted GPS receiver is a Fourth Amendment search. The Government argued that the *Katz* standard “show[ed] that no search occurred,” as the defendant had “no ‘reasonable  expectation of privacy’” in his whereabouts on the public roads,—a proposition with at least as much support in our case law as the one the State marshals here. But because the GPS receiver had been physically mounted on the defendant’s automobile (thus intruding on his “effects”), we held that tracking the vehicle’s movements was a search: a person’s “Fourth Amendment rights do not rise or fall with the *Katz* formulation.” The *Katz* reasonable-expectations test “has been *added to*, not *substituted for*,” the traditional property-based understanding of the Fourth Amendment, and so is unnecessary to consider when the government gains evidence by physically intruding on constitutionally protected areas.
 Thus, we need not decide whether the officers’ investigation of Jardines’ home violated his expectation of privacy under *Katz*. One virtue of the Fourth Amendment’s property-rights baseline is that it keeps easy cases easy. That the officers learned what they learned only by physically intruding on Jardines’ property  to gather evidence is enough to establish that a search occurred.
 For a related reason we find irrelevant the State’s argument (echoed by the dissent) that forensic dogs have been commonly used by police for centuries. This argument is apparently directed to our holding in *Kyllo v. United States*, that surveillance of the home is a search where “the Government uses a device that is not in general public use” to “explore details of the home that would previously have been unknowable *without physical intrusion*.” But the implication of that statement (*inclusio unius est exclusio alterius*) is that when the government uses a physical intrusion to explore details of the home (including its curtilage), the antiquity of the tools that they bring along is irrelevant.
*Holding*The government’s use of trained police dogs to investigate the home and its immediate surroundings is a “search” within the meaning of the Fourth Amendment. The judgment of the Supreme Court of Florida is therefore affirmed.

**Justice Kagan with whom Ginsburg J., and Sotomayor, J. join concurring**

For me, a simple analogy clinches this case—and does   so on privacy as well as property grounds. A stranger comes to the front door of your home carrying super-high-powered binoculars. He doesn’t knock or say hello. Instead, he stands on the porch and uses the binoculars to peer through your windows, into your home’s furthest corners. It doesn’t take long (the binoculars are really very fine): In just a couple of minutes, his uncommon behavior allows him to learn details of your life you disclose to no one. Has your “visitor” trespassed on your property, exceeding the license you have granted to members of the public to, say, drop off the mail or distribute campaign flyers? Yes, he has. And has he also invaded your “reasonable expectation of privacy,” by nosing into intimacies you sensibly thought protected from disclosure? Yes, of course, he has done that too.
 That case is this case in every way that matters. Here, police officers came to Joelis Jardines’ door with a super-sensitive instrument, which they deployed to detect things inside that they could not perceive unassisted. The equipment they used was animal, not mineral. But contra the  dissent, that is of no significance in determining whether a search occurred. Detective Bartelt’s dog was not your neighbor’s pet, come to your porch on a leisurely stroll. As this Court discussed earlier this Term, drug-detection dogs are highly trained tools of law enforcement, geared to respond in distinctive ways to specific scents so as to convey clear and reliable information to their human partners. They are to the poodle down the street as high-powered binoculars are to a piece of plain glass. Like the binoculars, a drug-detection dog is a specialized device for discovering objects not in plain view (or plain smell). And as in the hypothetical above, that device was aimed here at a home—the most private and inviolate (or so we expect) of all the places and things the Fourth Amendment protects. Was this activity a trespass? Yes, as the Court holds to-day. Was it also an invasion of privacy? Yes, that as well.
 The Court today treats this case under a property rubric; I write separately to note that I could just as happily have decided it by looking to Jardines’ privacy interests. A decision along those lines would have looked . . . well, much like this one. It would have talked about “‘the right of a man to retreat into his own home and there be free from unreasonable governmental intrusion.’”. It would have insisted on maintaining the “practical value” of that right by preventing police officers from standing in an adjacent space and “trawl[ing] for evidence with impunity.” It would have explained that “‘privacy expectations are most heightened’” in the home and the surrounding area. And it would have determined that police officers invade those shared expectations when they use trained canine assistants to reveal within the confines of a home what they could not otherwise have found there.
 It is not surprising that in a case involving a search of a home, property concepts and privacy concepts should so align. The law of property “naturally enough influence[s]” our “shared social expectations” of what places should   be free from governmental incursions. And so the sentiment “my home is my own,” while originating in property law, now also denotes a common understanding—extending even beyond that law’s formal protections—about an especially private sphere. Jardines’ home was his property; it was also his most intimate and familiar space. The analysis proceeding from each of those facts, as today’s decision reveals, runs mostly along the same path.
 I can think of only one divergence: If we had decided this case on privacy grounds, we would have realized that *Kyllo v. United States*, already resolved it. The *Kyllo* Court held that police officers conducted a search when they used a thermal-imaging device to detect heat emanating from a private home, even though they committed no trespass. Highlighting our intention to draw both a “firm” and a “bright” line at “the entrance to the house,” we announced the following rule:

“Where, as here, the Government uses a device that is not in general public use, to explore details of the home that would previously have been unknowable  [*22] without physical intrusion, the surveillance is a ‘search’ and is presumptively unreasonable without a warrant.”

That “firm” and “bright” rule governs this case: The police officers here conducted a search because they used a “device . . . not in general public use” (a trained drug-detection dog) to “explore details of the home” (the presence of certain substances) that they would not otherwise have discovered without entering the premises.
 And again, the dissent’s argument that the device is just a dog cannot change the equation. As *Kyllo* made clear,  the “sense-enhancing” tool at issue may be “crude” or “sophisticated,” may be old or new (drug-detection dogs actually go back not “12,000 years” or “centuries,” but only a few decades), may be either smaller or bigger than a breadbox; still, “at least where (as here)” the device is not “in general public use,” training it on a home violates our “minimal expectation of privacy”—an expectation “that *exists*, and that is acknowledged to be reasonable.” That does not mean the device is off-limits, as the dissent implies it just means police officers cannot use it to examine a home without a warrant or exigent circumstance.
 With these further thoughts, suggesting that a focus on Jardines’ privacy interests would make an “easy cas[e] easy” twice over, *ante*, at 10, I join the Court’s opinion in full.

.

**Justice Alito with whom Roberts, C.J. Kennedy, J. and Breyer, J. join dissenting**

The law of trespass generally gives members of the public a license to use a walkway to approach the front door of a house and to remain there for a brief time. This license is not limited to persons who intend to speak to an occupant or who actually do so. (Mail carriers and persons delivering packages and flyers are examples of individuals who may lawfully approach a front door without intending to converse.) Nor is the license restricted to categories of visitors whom an occupant of the dwelling is likely to welcome; as the Court acknowledges, this license applies even to “solicitors, hawkers and peddlers of all kinds.” And the license even extends to police officers who wish to gather evidence against an occupant (by asking potentially incriminating questions).
 According to the Court, however, the police officer in this case, Detective Bartelt, committed a trespass because he was accompanied during his otherwise lawful visit to the front door of respondent’s house by his dog, Franky.  Where is the authority evidencing such a rule? Dogs have been domesticated for about 12,000 years; they were ubiquitous in both this country and Britain at the time of the adoption of the Fourth Amendment; and their acute sense of smell has been used in law enforcement for centuries. Yet the Court has been unable to find a single case—from the United States or any other common-law nation—that supports the rule on which its decision is based. Thus, trespass law provides no support for the Court’s holding today.
 The Court’s decision is also inconsistent with the reasonable-expectations-of-privacy test that the Court adopted in *Katz v. United States.*. A reasonable person understands that odors emanating from a house may be detected from locations that are open to the public, and a reasonable person will not count on the strength of those odors remaining within the range that, while detectible by a dog, cannot be smelled by a human.
 For these reasons, I would hold that no search within the meaning of the Fourth Amendment took place in this case, and I would reverse the decision below.
 The opinion of the Court may leave a reader with the mistaken impression that Detective Bartelt and Franky remained on respondent’s property for a prolonged period of time and conducted a far-flung exploration of the front yard. But that is not what happened.
 Detective Bartelt and Franky approached the front door via the driveway and a paved path—the route that any visitor would customarily use **[4](http://www.lexis.com/research/retrieve?_m=d3eb9619362328179a0e22d2dd60d641&csvc=bl&cform=byName&_fmtstr=FULL&docnum=1&_startdoc=1&wchp=dGLzVzV-zSkAb&_md5=d9c30937a3be03b8046bbfb8cde5b269" \l "fnote4)**—and Franky was on the kind of leash that any dog owner might employ. **[5](http://www.lexis.com/research/retrieve?_m=d3eb9619362328179a0e22d2dd60d641&csvc=bl&cform=byName&_fmtstr=FULL&docnum=1&_startdoc=1&wchp=dGLzVzV-zSkAb&_md5=d9c30937a3be03b8046bbfb8cde5b269" \l "fnote5)** As Franky approached the door, he started to track an airborne odor. He held his head high and began “bracketing” the area (pacing back and forth) in order to determine the strongest source of the smell. Detective Bartelt knew “the minute [he] observed” this behavior that Franky had detected drugs. Upon locating the odor’s strongest source, Franky sat at the base of the front door, and at this point, Detective Bartelt and Franky immediately returned to their patrol car.
 A critical fact that the Court omits is that, as respondent’s counsel explained at oral argument, this entire process—walking down the driveway and front path to the front door, waiting for Franky to find the strongest source of the odor, and walking back to the car—took approximately a minute or two. Tr. of Oral Arg. 57-58. Thus, the amount of time that Franky and the detective remained at the front porch was even less. The Court also fails to mention that, while Detective Bartelt apparently did not personally smell the odor of marijuana coming from the house, another officer who subsequently stood on the front porch, Detective Pedraja, did notice that smell and was able to identify it. The Court concludes that the conduct in this case was a search because Detective Bartelt exceeded the boundaries of the license to approach the house that is recognized by the law of trespass, but the Court’s interpretation of the scope of that license is unfounded.
 It is said that members of the public may lawfully proceed along a walkway leading to the front door of a house because custom grants them a license to do so.. This rule encompasses categories of visitors whom most homeowners almost certainly wish to allow to approach their front doors—friends, relatives, mail carriers, persons making deliveries. But it also reaches categories of visitors who are less universally welcome—“solicitors,” “hawkers,” “peddlers,” and the like. The law might attempt to draw fine lines between categories of welcome and unwelcome visitors, distinguishing, for example, between tolerable and intolerable door-to-door peddlers (Girl Scouts selling cookies versus adults selling aluminum siding) or between police officers on agreeable and disagreeable missions (gathering information about a bothersome  neighbor versus asking potentially incriminating questions). But the law of trespass has not attempted such a difficult taxonomy. (“[C]onsent to an entry is often given legal effect even though the entrant has intentions that if known to the owner of the property would cause him for perfectly understandable and generally ethical or at least lawful reasons to revoke his consent”); (“[I]n order to determine if a business invitation is implied, the inquiry is not a subjective assessment of why the visitor chose to visit the premises in a particular instance”); (“there are many cases in which an invitation has been implied from circumstances, such as custom,” and that this test is “objective in that it stresses custom and the appearance of things” as opposed to “the undisclosed intention of the visitor”).
 Of course, this license has certain spatial and temporal limits. A visitor must stick to the path that is typically used to approach a front door, such as a paved walkway. A visitor cannot traipse through the garden, meander into the backyard, or take other circuitous detours that veer from the pathway that a visitor would customarily use. *,* (police exceeded scope of their implied invitation when they bypassed the front door and proceeded directly to the back yard); (“Any substantial and unreasonable departure from an area where the public is impliedly invited exceeds the scope of the implied invitation . . . ” (internal quotation marks and brackets omitted)); (“[W]hen the police come on to private property to conduct an investigation or for some other legitimate purpose and restrict their movements to places visitors could be expected to go (e.g., walkways, driveways, porches), observations made from such vantage points are not covered by the Fourth Amendment.”
 Nor, as a general matter, may a visitor come to the front door in the middle of the night without an express invitation. (“Furtive intrusion late at night or in the predawn hours is not conduct that is expected from ordinary visitors. Indeed, if observed by a resident of the premises, it could be a cause for great alarm”).
 Similarly, a visitor may not linger at the front door for an extended period. (“[T]here is no such thing as squatter’s rights on a front porch. A stranger may not plop down uninvited to spend the afternoon in the front porch rocking chair, or throw down a sleeping bag to spend the night, or lurk on the front porch, looking in the windows”). The license is limited to the amount of time it would customarily take to approach the door, pause long enough to see if someone is home, and (if not expressly invited to stay longer), leave.

 As I understand the law of trespass and the scope of the implied license, a visitor who adheres to these limitations is not necessarily required to ring the doorbell, knock on the door, or  attempt to speak with an occupant. For example, mail carriers, persons making deliveries, and individuals distributing flyers may leave the items they are carrying and depart without making any attempt to converse. A pedestrian or motorist looking for a particular address may walk up to a front door in order to check a house number that is hard to see from the sidewalk or road. A neighbor who knows that the residents are away may approach the door to retrieve an accumulation of newspapers that might signal to a potential burglar that the house is unoccupied.
 As the majority acknowledges, this implied license to approach the front door extends to the police. . As we recognized in *Kentucky* v. *King*,), police officers do not engage in a search when they approach the front door of a residence and seek to engage in what is termed a “knock and talk,” *i.e.*, knocking on the door and seeking to speak to an occupant for the purpose of gathering evidence. (“When law enforcement officers who are not armed with a warrant knock on a door, they do no more than any private citizen might do”).  ... Even when the objective of a “knock and talk” is to obtain evidence that will lead to the homeowner’s arrest and prosecution, the license to approach still applies. In other words, gathering evidence—even damning evidence—is a lawful activity that falls within the scope of the license to approach. And when officers walk up to the front door of a house, they are permitted to see, hear, and smell whatever can be detected from a lawful vantage point. (“The Fourth Amendment protection of the home has never been extended to require law enforcement officers to shield their eyes when passing by a home on public thoroughfares”); (“[P]olice officers restricting their activity to [areas to which the public is impliedly invited] are permitted the same intrusion and the same level of observation as would be expected from a reasonably respectful citizen.”
 Detective Bartelt did  not exceed the scope of the license to approach respondent’s front door. He adhered to the customary path; he did not approach in the middle of the night; and he remained at the front door for only a very short period (less than a minute or two).

The Court concludes that Detective Bartelt went too far because he had the “objectiv[e] *. . .* purpose to conduct a search.” What this means, I take it, is that anyone aware of what Detective Bartelt did would infer that his subjective purpose was to gather evidence. But if this is the Court’s point, then a standard “knock and talk” and most other police visits would likewise constitute searches. With the exception of visits to serve warrants or civil process, police almost always approach homes with a purpose of discovering information. That is certainly the objective of a “knock and talk.” The Court offers no meaningful way of distinguishing the “objective purpose” of a “knock and talk” from the “objective purpose” of Detective Bartelt’s conduct here.
 The Court contends that a “knock and talk” is different because it involves talking, and “all are invited” to do that. But a   police officer who approaches the front door of a house in accordance with the limitations already discussed may gather evidence by means other than talking. The officer may observe items in plain view and smell odors coming from the house. So the Court’s “objective purpose” argument cannot stand.
 What the Court must fall back on, then, is the particular instrument that Detective Bartelt used to detect the odor of marijuana, namely, his dog. But in the entire body of common-law decisions, the Court has not found a single case holding that a visitor to the front door of a home commits a trespass if the visitor is accompanied by a dog on a leash. On the contrary, the common law allowed even unleashed dogs to wander on private property without committing a trespass.
 The Court responds that “[i]t is not the dog that is the problem, but the behavior that here involved use of the dog.” But where is the support in the law of trespass for this proposition? Dogs’ keen sense of smell has been used in law enforcement for centuries. The antiquity of this practice is evidenced by a Scottish law from 1318 that made it a crime to “disturb a tracking dog or the men coming with it for pursuing thieves or seizing malefactors.” If bringing a tracking dog to the front door of a home constituted a trespass, one would expect at least one case to have arisen during the past 800 years. But the Court has found none.
 For these reasons, the real law of trespass provides no support for the Court’s holding today. While the Court claims that its reasoning has “ancient and durable roots,” its trespass rule is really a newly struck counterfeit.
 The concurring opinion attempts to provide an alternative ground for today’s decision, namely, that Detective Bartelt’s conduct violated respondent’s reasonable expectations of privacy. But we have already rejected a very similar, if not  identical argument, see and in any event I see no basis for concluding that the occupants of a dwelling have a reasonable expectation of privacy in odors that emanate from the dwelling and reach spots where members of the public may lawfully stand.
 It is clear that the occupant of a house has no reasonable expectation of privacy with respect to odors that can be smelled by human beings who are standing in such places. …And I would not draw a line between odors that can be smelled by humans and those that are detectible only by dogs.
 Consider the situation from the point of view of the occupant of a building in which marijuana is grown or methamphetamine is manufactured.  ould such an occupant reason as follows? “I know that odors may emanate from my building and that atmospheric conditions, such as the force and direction of the wind, may affect the strength of those odors when they reach a spot where members of the public may lawfully stand. I also know that some people have a much more acute sense of smell than others, **[6](http://www.lexis.com/research/retrieve?_m=d3eb9619362328179a0e22d2dd60d641&csvc=bl&cform=byName&_fmtstr=FULL&docnum=1&_startdoc=1&wchp=dGLzVzV-zSkAb&_md5=d9c30937a3be03b8046bbfb8cde5b269" \l "fnote6)** and I have no idea who might be standing in one of the spots in question when the odors from my house reach that location. In addition, I know that odors coming from my building, when they reach these locations, may be strong enough to be detected by a dog. But I am confident that they will be so faint that they cannot be smelled by any human being.” Such a finely tuned expectation would be entirely unrealistic, and I see no evidence that society is prepared to recognize it as reasonable.
 In an attempt to show that respondent had a reasonable expectation of privacy in the odor of marijuana wafting from his house, the concurrence argues that this case is just like Kyllo v. United States, which held that police officers conducted a search when they used a thermal imaging device to detect heat emanating from a house. This Court, however, has already rejected the argument that the use of a drug-sniffing dog is the same as the use of a thermal imaging device. The very argument now advanced by the concurrence appears in Justice Souter’s *Caballes* dissent. But the Court was not persuaded.

 Contrary to the interpretation propounded by the concurrence, *Kyllo* is best understood as a decision about the use of new technology. The *Kyllo* Court focused on the fact that the thermal imaging device was a form of “sense-enhancing technology” that was “not in general public use,” and it expressed concern that citizens would be “at the mercy of advancing technology” if its use was not restricted.A dog, however, is not a new  form of “technology or a “device.” And, as noted, the use of dogs’ acute sense of smell in law enforcement dates back many centuries.
 The concurrence suggests that a *Kyllo*-based decision would be “much like” the actual decision of the Court, but that is simply not so. The holding of the Court is based on what the Court sees as a “‘physical intrusion of a constitutionally protected area.’” As a result, it does not apply when a dog alerts while on a public sidewalk or street or in the corridor of a building to which the dog and handler have been lawfully admitted.
 The concurrence’s *Kyllo*-based approach would have a much wider reach. When the police used the thermal imaging device in *Kyllo*, they were on a public street, and “committed no trespass.” Therefore, if a dog’s nose is just like a thermal imaging device for Fourth Amendment purposes, a search would occur if a dog alerted while on a public sidewalk or in the corridor of an apartment building. And the same would be true if the dog was trained to sniff, not for marijuana, but for more dangerous  quarry, such as explosives or for a violent fugitive or kidnaped child. I see no ground for hampering legitimate law enforcement in this way.
 The conduct of the police officer in this case did not constitute a trespass and did not violate respondent’s reasonable expectations of privacy. I would hold that this conduct was not a search, and I therefore respectfully dissent.

# Case of *Harris v. Florida*

HARRIS V. FLORIDA

__U.S.___ (2013)

Kagan, J.

**Issue**

In this case, we consider how a court should determine if the “alert” of a drug-detection dog during a traffic stop provides probable cause to search a vehicle. The Florida Supreme Court held that the State must in every case present an exhaustive set of records, including a log of the dog’s performance in the field, to establish the dog’s reliability

**Facts**

William Wheetley is a K–9 Officer in the Liberty County, Florida Sheriff’s Office. On June 24, 2006, he was on a routine patrol with Aldo, a German shepherd trained to detect certain narcotics (methamphetamine, marijuana, cocaine, heroin, and ecstasy). Wheetley pulled over respondent Clayton Harris’s truck because it had an expired license plate. On approaching the driver’s-side door, Wheetley saw that Harris was “visibly nervous,” unable to sit still, shaking, and breathing rapidly. Wheetley also noticed an open can of beer in the truck’s cup holder. . Wheetley asked Harris for consent to search the truck, but Harris refused. At that point, Wheetley retrieved Aldo from the patrol car and walked him around Harris’s truck for a “free air sniff.” Aldo alerted at the driver’s-side door handle—signaling, through a distinctive set of behaviors, that he smelled drugs there.
 Wheetley concluded, based principally on Aldo’s alert, that he had probable cause to search the truck. His search did not turn up any of the drugs Aldo was trained to detect. But it did reveal 200 loose pseudoephedrine pills, 8,000 matches, a bottle of hydrochloric acid, two containers of antifreeze, and a coffee filter full of iodine crystals—all ingredients for making methamphetamine. Wheetley accordingly arrested Harris, who admitted after proper Miranda warnings that he routinely “cooked” methamphetamine at his house and could not go “more than a few days without using” it. The State charged Harris with possessing pseudoephedrine for use in manufacturing methamphetamine.

While out on bail, Harris had another run-in with Wheetley and Aldo. This time, Wheetley pulled Harris over for a broken brake light. Aldo again sniffed the truck’s exterior, and again alerted at the driver’s-side door handle. Wheetley once more searched the truck, but on this occasion discovered nothing of interest.
 Harris moved to suppress the evidence found in his truck on the ground that Aldo’s alert had not given Wheetley probable cause for a search. At the hearing on that motion, Wheetley testified about both his and Aldo’s training in drug detection. In 2004, Wheetley (and a different dog) completed a 160-hour course in narcotics detection offered by the Dothan, Alabama Police Department, while Aldo (and a different handler) completed a similar, 120-hour course given by the Apopka, Florida Police Department. That same year, Aldo received a one-year certification from Drug Beat, a private company that specializes in testing and certifying K–9 dogs. Wheetley and Aldo teamed up in 2005 and went through another, 40-hour refresher course in Dothan together. They also did four hours of training exercises each week to maintain their skills. Wheetley would hide drugs in certain ve- hicles or buildings while leaving others “blank” to determine whether Aldo alerted at the right places. According to Wheetley, Aldo’s performance in those exercises was “really good.” The State introduced “Monthly Canine Detection Training Logs” consistent with that testimony: They showed that Aldo always found hidden drugs and that he performed “satisfactorily” (the higher of two possible assessments) on each day of training.
 On cross-examination, Harris’s attorney chose not to contest the quality of Aldo’s or Wheetley’s training. She focused instead on Aldo’s certification and his performance in the field, particularly the two stops of Harris’s truck. Wheetley conceded that the certification (which, he noted, Florida law did not require) had expired the year before he pulled Harris over. Wheetley also acknowledged that he did not keep complete records of Aldo’s performance in traffic stops or other field work; instead, he maintained records only of alerts resulting in arrests. But Wheetley defended Aldo’s two alerts to Harris’s seemingly narcotics-free truck: According to Wheetley, Harris probably transferred the odor of methamphetamine to the door handle, and Aldo responded to that “residual odor.”
 The trial court concluded that Wheetley had probable cause to search Harris’s truck and so denied the motion to suppress. Harris then entered a no-contest plea while reserving the right to appeal the trial court’s ruling. An intermediate state court summarily affirmed.
 The Florida Supreme Court reversed, holding that Wheetley lacked probable cause to search Harris’s vehicle under the Fourth Amendment “[W]hen a dog alerts,” the court wrote, “the fact that the dog has been trained and certified is simply not enough to establish probable cause.” To demonstrate a dog’s reliability, the State needed to produce a wider array of evidence:

“[T]he State must present . . . the dog’s training and certification records, an explanation of the meaning of the particular training and certification, field performance records (including any unverified alerts), and evidence concerning the experience and training of the officer handling the dog, as well as any other objective evidence known to the officer about the dog’s reliability.”

The court particularly stressed the need for “evidence of the dog’s performance history,” including records showing “how often the dog has alerted in the field without illegal contraband having been found.” That data, the court stated, could help to expose such problems as a handler’s tendency (conscious or not) to “cue [a] dog to alert” and “a dog’s inability to distinguish between residual odors and actual drugs.” Accordingly, an officer like Wheetley who did not keep full records of his dog’s field performance could never have the requisite cause to think “that the dog is a reliable indicator of drugs.”

**Reasoning**

A police officer has probable cause to conduct a search when “the facts available to [him] would ‘warrant a [person] of reasonable caution in the belief’” that contraband or evidence of a crime is present. The test for probable cause is not reducible to “precise definition or quantification.” “Finely tuned standards such as proof beyond a reasonable doubt or by a preponderance of the evidence . . . have no place in the [probable-cause] decision.” All we have required is the kind of “fair probability” on which “reasonable and prudent [people,] not legal technicians, act.”
 In evaluating whether the State has met this practical and common-sensical standard, we have consistently looked to the totality of the circumstances. We have rejected rigid rules, bright-line tests, and mechanistic inquiries in favor of a more flexible, all-things-considered approach. In *Gates*, for example, we abandoned our old test for assessing the reliability of informants’ tips because it had devolved into a “complex superstructure of evidentiary and analytical rules,” any one of which, if not complied with, would derail a finding of probable cause. We lamented the development of a list of “inflexible, independent requirements applicable in every case.” Probable cause, we emphasized, is “a fluid concept—turning on the assessment of probabilities in particular factual contexts—not readily, or even use- fully, reduced to a neat set of legal rules.”
 The Florida Supreme Court flouted this established approach to determining probable cause. To assess the reliability of a drug-detection dog, the court created a strict evidentiary checklist, whose every item the State must tick off. Most prominently, an alert cannot establish probable cause under the Florida court’s decision unless the State introduces comprehensive documentation of the dog’s prior “hits” and “misses” in the field. (One wonders how the court would apply its test to a rookie dog.) No matter how much other proof the State offers of the dog’s reliability, the absent field performance records will preclude a finding of probable cause. That is the antithesis of a totality-of-the-circumstances analysis. It is, indeed, the very thing we criticized in *Gates* when we overhauled our method for assessing the trustworthiness of an informant’s tip. A gap as to any one matter, we explained, should not sink the State’s case; rather, that “deficiency . . . may be compensated for, in determining the overall reliability of a tip, by a strong showing as to . . . other indicia of reliability.” So too here, a finding of a drug-detection dog’s reliability cannot depend on the State’s satisfaction of multiple, independent evidentiary requirements. No more for dogs than for human informants is such an inflexible checklist the way to prove reliability, and thus establish probable cause.
 Making matters worse, the decision below treats records of a dog’s field performance as the gold standard in evidence, when in most cases they have relatively limited import. Errors may abound in such records. If a dog on patrol fails to alert to a car containing drugs, the mistake usually will go undetected because the officer will not initiate a search. Field data thus may not capture a dog’s false negatives. Conversely (and more relevant here), if the dog alerts to a car in which the officer finds no narcotics, the dog may not have made a mistake at all. The dog may have detected substances that were too well hidden or present in quantities too small for the officer to locate. Or the dog may have smelled the residual odor of drugs previously in the vehicle or on the driver’s person. Field data thus may markedly overstate a dog’s real false positives. By contrast, those inaccuracies—in either direction—do not taint records of a dog’s performance in standard training and certification settings. There, the designers of an assessment know where drugs are hidden and where they are not—and so where a dog should alert and where he should not. The better measure of a dog’s reliability thus comes away from the field, in controlled testing environments.
 For that reason, evidence of a dog’s satisfactory performance in a certification or training program can itself provide sufficient reason to trust his alert. If a bona fide organization has certified a dog after testing his reliability in a controlled setting, a court can presume (subject to any conflicting evidence offered) that the dog’s alert provides probable cause to search. The same is true, even in the absence of formal certification, if the dog has recently and successfully completed a training program that evaluated his proficiency in locating drugs. After all, law enforcement units have their own strong incentive to use effective training and certification programs, because only accurate drug-detection dogs enable officers to locate contraband without incurring unnecessary risks or wasting limited time and resources.
 A defendant, however, must have an opportunity to challenge such evidence of a dog’s reliability, whether by cross-examining the testifying officer or by introducing his own fact or expert witnesses. The defendant, for example, may contest the adequacy of a certification or training program, perhaps asserting that its standards are too lax or its methods faulty. So too, the defendant may examine how the dog (or handler) performed in the assessments made in those settings. Indeed, evidence of the dog’s (or handler’s) history in the field, although susceptible to the kind of misinterpretation we have discussed, may sometimes be relevant, as the Solicitor General acknowledged at oral argument. [T]he defendant can ask the handler, if the handler is on the stand, about field performance, and then the court can give that answer whatever weight is appropriate”). And even assuming a dog is generally reliable, circumstances surrounding a particular alert may undermine the case for probable cause—if, say, the officer cued the dog (consciously or not), or if the team was working under un- familiar conditions.
 In short, a probable-cause hearing focusing on a dog’s alert should proceed much like any other. The court should allow the parties to make their best case, consistent with the usual rules of criminal procedure. And the court should then evaluate the proffered evidence to decide what all the circumstances demonstrate. If the State has produced proof from controlled settings that a dog performs reliably in detecting drugs, and the defendant has not contested that showing, then the court should find probable cause. If, in contrast, the defendant has challenged the State’s case (by disputing the reliability of the dog overall or of a particular alert), then the court should weigh the competing evidence. In all events, the court should not prescribe, as the Florida Supreme Court did, an inflexible set of evidentiary requirements. The question—similar to every inquiry into probable cause—is whether all the facts surrounding a dog’s alert, viewed through the lens of common sense, would make a reason- ably prudent person think that a search would reveal con- traband or evidence of a crime. A sniff is up to snuff when it meets that test.
 And here, Aldo’s did. The record in this case amply supported the trial court’s determination that Aldo’s alert gave Wheetley probable cause to search Harris’s truck.
 The State, as earlier described, introduced substantial evidence of Aldo’s training and his proficiency in finding drugs. The State showed that two years before alerting to Harris’s truck, Aldo had successfully completed a 120-hour program in narcotics detection, and separately obtained a certification from an independent company. And although the certification expired after a year, the Sheriff’s Office required continuing training for Aldo and Wheetley. The two satisfied the requirements of another, 40-hour training program one year prior to the search at issue. And Wheetley worked with Aldo for four hours each week on exercises designed to keep their skills sharp. Wheetley testified, and written records confirmed, that in those settings Aldo always performed at the highest level.
 Harris, as also noted above, declined to challenge in the trial court any aspect of Aldo’s training. To be sure, Harris’s briefs in this Court raise questions about that training’s adequacy—for example, whether the programs simulated sufficiently diverse environments and whether they used enough blind testing (in which the handler does not know the location of drugs and so cannot cue the dog). See Brief for Respondent 57–58. Similarly, Harris here queries just how well Aldo performed in controlled testing. See id., at 58. But Harris never voiced those doubts in the trial court, and cannot do so for the first time here. As the case came to the trial court, Aldo had successfully completed two recent drug-detection courses and maintained his proficiency through weekly training exercises. Viewed alone, that training record—with or without the prior certification—sufficed to establish Aldo’s reliability.
 And Harris’s cross-examination of Wheetley, which focused on Aldo’s field performance, failed to rebut the State’s case. Harris principally contended in the trial court that because Wheetley did not find any of the substances Aldo was trained to detect, Aldo’s two alerts must have been false. But we have already described the hazards of inferring too much from the failure of a dog’s alert to lead to drugs; and here we doubt that Harris’s logic does justice to Aldo’s skills. Harris cooked and used methamphetamine on a regular basis; so as Wheetley later surmised, Aldo likely responded to odors that Harris had transferred to the driver’s-side door handle of his truck. A well-trained drug-detection dog should alert to such odors; his response to them might appear a mistake, but in fact is not. And still more fundamentally, we do not evaluate probable cause in hindsight, based on what a search does or does not turn up. For the reasons already stated, Wheetley had good cause to view Aldo as a reliable detector of drugs. And no special circumstance here gave Wheetley reason to discount Aldo’s usual dependability or distrust his response to Harris’s truck.

**Holding**

Because training records established Aldo’s reliability in detecting drugs and Harris failed to undermine that showing, we agree with the trial court that Wheetley had probable cause to search Harris’s truck. We accordingly reverse the judgment of the Florida

[ST] CHAPTER FOUR

# WERE THE POLICE JUSTIFIED IN RELYING ON THE INFORMANT’S TIP?

*ALABAMA V. WHITE*

496 U.S. 325 (1990)

White, J.

 **Facts** 
  On April 22, 1987, at approximately 3 p.m., Corporal B. H. Davis of the Montgomery Police Department received a telephone call from an anonymous person, stating that Vanessa White would be leaving 235-C Lynwood Terrace Apartments at a particular time in a brown   Plymouth station wagon with the right taillight lens broken, that she would be going to Dobey's Motel, and that she would be in possession of about an ounce of cocaine inside a brown attache case. Corporal Davis and his partner, Corporal P. A. Reynolds, proceeded to the Lynwood Terrace Apartments. The officers saw a brown Plymouth station wagon with a broken right taillight in the parking lot in front of the 235 building. The officers observed respondent leave the 235 building, carrying nothing in her hands, and enter the station wagon. They followed the vehicle as it drove the most direct route to Dobey's Motel. When the vehicle reached the Mobile Highway, on which Dobey's Motel is located, Corporal Reynolds requested a patrol unit to stop the vehicle. The vehicle was stopped at approximately 4:18 p.m., just short of Dobey's Motel. Corporal Davis asked respondent to step to the rear of her car, where he informed her    that she had been stopped because she was suspected of carrying cocaine in the vehicle. He asked if they could look for cocaine and respondent said they could look. The officers found a locked brown attache case in the car and, upon request, respondent provided the combination to the lock. The officers found marijuana in the attache case and placed respondent under arrest. During processing at the station, the officers found three milligrams of cocaine in respondent's purse.
 Respondent was charged in Montgomery County court with possession of marijuana and possession of cocaine. The trial court denied respondent's motion to suppress and she pleaded guilty to the charges, reserving the right to appeal  the denial of her suppression motion. The Court of Criminal Appeals of Alabama held that the officers did not have the reasonable suspicion necessary under Terry v. Ohio, to justify the investigatory stop of respondent's car, and that the marijuana and cocaine were fruits of respondent's unconstitutional detention. The court concluded that respondent's motion to dismiss should have been granted and reversed her conviction. The Supreme Court of Alabama denied the State's petition for writ of certiorari, two justices dissenting. Because of differing views in the state and federal courts over whether an anonymous tip may furnish reasonable suspicion for a stop, we granted the State's petition for certiorari. We now reverse.
 Adams V. Williams, sustained a Terry stop and frisk undertaken on the basis of a tip given in person by a known informant who had provided information in the past. We concluded that, while the unverified tip may have been insufficient to support an arrest or search warrant, the information carried sufficient "indicia of reliability" to justify a forcible stop. We did not address the issue of anonymous tips in Adams, except to say that "this is a stronger case than obtains in the case of an anonymous telephone tip,"  
  *Illinois v. Gates*, 462 U.S. 213 (1983), dealt with an anonymous tip in the probable cause context. The Court there abandoned the "two-pronged test" in favor of a "totality of the circumstances" approach to determining whether an informant's tip establishes probable cause. *Gates* made clear, however, that those factors that had been considered critical -- an informant's "veracity," "reliability," and "basis of knowledge" -- remain "highly relevant in determining the value of his report." These factors are also relevant in the reasonable suspicion context, although allowance  must be made in applying them for the lesser showing required to meet that standard.
 The opinion in *Gates* recognized that an anonymous tip alone seldom demonstrates the informant's basis of knowledge or veracity inasmuch as ordinary citizens generally do not provide extensive recitations of the basis of their everyday observations and given that the veracity of persons supplying anonymous tips is "by hypothesis largely unknown, and unknowable." This is not to say that an anonymous caller could never provide the reasonable suspicion necessary for a *Terry* stop. But the tip in *Gates* was not an exception to the general rule, and the anonymous tip in this case is like the one in *Gates*: "[it] provides virtually nothing from which one might conclude that [the caller] is either honest or his information reliable; likewise, the [tip] gives absolutely no indication of the basis for the [caller's] predictions regarding [Vanessa White's]  criminal activities." By requiring "something more," as *Gates* did, we merely apply what we said in *Adams*: "Some tips, completely lacking in indicia of reliability, would either warrant no police response or require further investigation before a forcible stop of a suspect would be authorized." Simply put, a tip such as this one, standing alone, would not "'warrant a man of reasonable caution in the belief' that [a stop] was appropriate." As there was in *Gates,* however, in this case there is more than the tip itself. The tip was not as detailed, and the corroboration was not as complete, as in *Gates,* but the required degree of suspicion was likewise not as high.
 Reasonable suspicion is a less demanding standard than probable cause not only in the sense that reasonable suspicion can be established with information that is different in quantity or content than that required to establish probable cause, but also in the sense that reasonable suspicion can arise from information that is less reliable than that required to show probable cause. Adams v. Williams, demonstrates as much. We there assumed that the unverified tip from the known informant might not have been reliable enough to establish probable cause, but nevertheless found it sufficiently reliable to justify a Terry stop. 407 U.S. at 147. Reasonable suspicion, like probable cause, is dependent upon both the content of information possessed by police and its degree of reliability. Both factors--quantity and quality--are considered in the "totality of the circumstances--the whole picture," that must be taken into account when evaluating whether there is reasonable suspicion. Thus, if a tip has a relatively low degree of reliability, more information will be required to establish the requisite quantum of suspicion than would be required if the tip were more reliable. The Gates Court applied its totality of the circumstances approach in this manner, taking into account the facts known to the officers from personal observation, and giving the anonymous tip the weight it deserved in light of its indicia of reliability as established through independent police work. The same approach applies in the reasonable suspicion context, the only difference being the level of suspicion that must be established. Contrary to the court below, we conclude that when the officers stopped respondent, the anonymous tip had been sufficiently corroborated to furnish reasonable suspicion that respondent was engaged in criminal activity and that the investigative stop therefore did not violate the Fourth Amendment.
  It is true that not every detail mentioned by the tipster was verified, such as the name of the woman leaving the building or the precise apartment from which she left; but the officers did corroborate that a woman left the 235 building and got into the particular    vehicle that was described by the caller. With respect to the time of departure predicted by the informant, Corporal Davis testified that the caller gave a particular time when the woman would be leaving, but he did not state what that time was. He did testify that, after the call, he and his partner proceeded to the Lynwood Terrace Apartments to put the 235 building under surveillance. Given the fact that the officers proceeded to the indicated address immediately after the call and that respondent emerged not too long thereafter, it appears from the record before us that respondent's departure from the building was within the time frame predicted by the caller. As for the caller's prediction of respondent's destination, it is true that the officers stopped her just short of Dobey's Motel and did not know whether she would have pulled in or continued on past it. But given that the four-mile route driven by respondent was the most direct route possible to Dobey's Motel, but nevertheless involved several turns, we think respondent's destination was significantly corroborated.
  The Court's opinion in Gates gave credit to the proposition that because an informant is shown to be right about some things, he is probably right about other facts that he has alleged, including the claim that the object of the tip is engaged in criminal activity. Thus, it is not  unreasonable to conclude in this case that the independent corroboration by the police of significant aspects of the informer's predictions imparted some degree of reliability to the other allegations made by the caller.
 We think it also important that, as in Gates, "the anonymous [tip] contained a range of details relating not just to easily obtained facts and conditions existing at the time of the tip, but to future actions of third parties ordinarily not easily predicted." The fact that the officers found a car precisely matching the caller's description in front of the 235 building is an example of the former. Anyone could have "predicted" that fact because it was a condition presumably existing at the time of the call. What was important was the caller's ability to predict respondent's future behavior, because it demonstrated inside information -- a special familiarity with respondent's affairs. The general public would have had no way of knowing that respondent would shortly leave the building, get in the described car, and drive the most direct route to Dobey's Motel. Because only a small number of people are generally privy to an individual's itinerary, it is reasonable for police to believe that a person with access to such information is likely to also have access to reliable information about that individual's illegal activities. When significant aspects of the caller's predictions were verified, there was reason to believe not only that the caller was honest but also that he was well informed, at least well enough to justify the stop.
 Alhough it is a close case, we conclude that under the totality of the circumstances the anonymous tip, as corroborated, exhibited sufficient indicia of reliability to justify the investigatory stop of respondent's car. We therefore reverse the judgment of the Court of Criminal Appeals of Alabama and remand for further proceedings not inconsistent with this opinion.

So ordered.

Justice Stevens, with whom Justice Brennan and Justice Marshall join, **dissenting**

 Millions of people leave their apartments at about the same time every day carrying an attache' case and heading for a destination known to their neighbors. Usually, however, the neighbors do not know what the briefcase contains. An anonymous neighbor's prediction about somebody's time of departure and probable destination is anything but a  reliable basis for assuming that the commuter is  in possession of an illegal substance -- particularly when the person is not even carrying the attache' case described by the tipster.
The record in this case does not tell us how often respondent drove from the Lynwood Terrace Apartments to Dobey's Motel; for all we know, she may have been a room clerk or telephone operator working the evening shift. It does not tell us whether Office Davis made any effort to ascertain the informer's identity, his reason for calling, or the basis of his prediction about respondent's destination. Indeed, for all that this record tells us, the tipster may well have been another police officer who had a "hunch" that respondent might have cocaine in her attache' case.
 Anybody with enough knowledge about a given person to make her the target of a prank, or to harbor a grudge against her, will certainly be able to formulate a tip about her like the one predicting Vanessa White’s excursion. In addition, under the Court’s holding, every citizen is subject to being seized and questioned by any officer who is prepared to testify that the warrantless stop was based on an anonymous tip predicting whatever conduct the officer just observed. Fortunately, the vast majority of those in our law enforcement community would not adopt such a practice. But the Fourth Amendment was intended to protect the citizen from the overzealous and unscrupulous officer as well as from those who are conscientious and truthful. This decision makes a mockery of that protection.

I respectfully dissent.

**Questions for Discussion**

1. What information was provided in the anonymous tip.

2. Why did the Supreme Court conclude that the police were justified in stopping White despite the fact that the tip failed to meet the tests of reliability and source of information.

3. How does the Supreme Court distinguish between the standard for an informant in establishing probable cause and the standard for reasonable suspicion.

4. Do you agree with the argument of the dissent. What would happen if the entire Court had adopted the view of the dissenting judges.

# REASONABLE SUSPICION THAT A DRIVER HAS A REVOKED LICENSE

*KANSAS V. GLOVER*

*__U.S. ___(2020)*

Justice THOMAS delivered the opinion of the Court.

**ISSUE**

This case presents the question whether a police officer violates the Fourth Amendment by initiating an investigative traffic stop after running a vehicle's license plate and learning that the registered owner has a revoked driver's license.

**FACTS**

Kansas charged respondent Charles Glover, Jr., with driving as a habitual violator after a traffic stop revealed that he was driving with a revoked license. Glover filed a motion to suppress all evidence seized during the stop, claiming that the officer lacked reasonable suspicion. Neither Glover nor the police officer testified at the suppression hearing. Instead, the parties stipulated to the following facts:

"1. Deputy Mark Mehrer is a certified law enforcement officer employed by the Douglas County Kansas Sheriff's Office.

2. On April 28, 2016, Deputy Mehrer was on routine patrol in Douglas County when he observed a 1995 Chevrolet 1500 pickup truck with Kansas plate 295ATJ.

3. Deputy Mehrer ran Kansas plate 295ATJ through the Kansas Department of Revenue's file service. The registration came back to a 1995 Chevrolet 1500 pickup truck.

4. Kansas Department of Revenue files indicated the truck was registered to Charles Glover Jr. The files also indicated that Mr. Glover had a revoked driver's license in the State of Kansas.

5. Deputy Mehrer assumed the registered owner of the truck was also the driver, Charles Glover Jr.

6. Deputy Mehrer did not observe any traffic infractions, and did not attempt to identify the driver [of] the truck. Based solely on the information that the registered owner of the truck was revoked, Deputy Mehrer initiated a traffic stop.

7. The driver of the truck was identified as the defendant, Charles Glover Jr." App. to Pet. for Cert. 60-61.

The District Court granted Glover's motion to suppress. The Court of Appeals reversed, holding that "it was reasonable for [Deputy] Mehrer to infer that the driver was the owner of the vehicle" because "there were specific and articulable facts from which the officer's common-sense inference gave rise to a reasonable suspicion." The Kansas Supreme Court reversed….We granted Kansas' petition for a writ of certiorari ….

**Reasoning**

Under this Court's precedents, the Fourth Amendment permits an officer to initiate a brief investigative traffic stop when he has "a particularized and objective basis for suspecting the particular person stopped of criminal activity." "Although a mere `hunch' does not create reasonable suspicion, the level of suspicion the standard requires is considerably less than proof of wrongdoing by a preponderance of the evidence, and obviously less than is necessary for probable cause.".

Because it is a "less demanding" standard, "reasonable suspicion can be established with information that is different in quantity or content than that required to establish probable cause." The standard "depends on the factual and practical considerations of everyday life on which reasonable and prudent men*,* not legal technicians, act." Courts "cannot reasonably demand scientific certainty ... where none exists." Rather, they must permit officers to make "commonsense judgments and inferences about human behavior." An officer in making a judgment"` need not rule out the possibility of innocent conduct.'"

We have previously recognized that States have a "vital interest in ensuring that only those qualified to do so are permitted to operate motor vehicles [and] that licensing, registration, and vehicle inspection requirements are being observed." With this in mind, we turn to whether the facts known to Deputy Mehrer at the time of the stop gave rise to reasonable suspicion. We conclude that they did.

Before initiating the stop, Deputy Mehrer observed an individual operating a 1995 Chevrolet 1500 pickup truck with Kansas plate 295ATJ. He also knew that the registered owner of the truck had a revoked license and that the model of the truck matched the observed vehicle. From these three facts, Deputy Mehrer drew the commonsense inference that Glover was likely the driver of the vehicle, which provided more than reasonable suspicion to initiate the stop.

The fact that the registered owner of a vehicle is not always the driver of the vehicle does not negate the reasonableness of Deputy Mehrer's inference. Such is the case with all reasonable inferences. The reasonable suspicion inquiry "falls considerably short" of 51% accuracy.

Glover's revoked license does not render Deputy Mehrer's inference unreasonable either. Empirical studies demonstrate what common experience readily reveals: Drivers with revoked licenses frequently continue to drive and therefore to pose safety risks to other motorists and pedestrians. Studies indicate that 75% of drivers with suspended or revoked licenses continue to drive and 19% of motor vehicle fatalities from 2008-2012 “involved drivers with invalid licenses.”

Although common sense suffices to justify this inference, Kansas law reinforces that it is reasonable to infer that an individual with a revoked license may continue driving. The State's license-revocation scheme covers drivers who have already demonstrated a disregard for the law or are categorically unfit to drive. The Division of Vehicles of the Kansas Department of Revenue (Division) "shall" revoke a driver's license upon certain convictions for involuntary manslaughter, vehicular homicide, battery, reckless driving, fleeing or attempting to elude a police officer, or conviction of a felony in which a motor vehicle is used. Reckless driving is defined as "driv[ing] any vehicle in willful or wanton disregard for the safety of persons or property." The Division also has discretion to revoke a license if a driver "[h]as been convicted with such frequency of serious offenses against traffic regulations governing the movement of vehicles as to indicate a disrespect for traffic laws and a disregard for the safety of other persons on the highways," "has been convicted of three or more moving traffic violations committed on separate occasions within a 12-month period," "is incompetent to drive a motor vehicle," or "has been convicted of a moving traffic violation, committed at a time when the person's driving privileges were restricted, suspended[,] or revoked." The reasons include violating license restrictions, being under house arrest, and being a habitual violator, which Kansas defines as a resident or nonresident who has been convicted three or more times within the past five years of certain enumerated driving offenses. The concerns motivating the State's various grounds for revocation lend further credence to the inference that a registered owner with a revoked Kansas driver's license might be the one driving the vehicle.

Glover and the dissent respond with two arguments as to why Deputy Mehrer lacked reasonable suspicion. Neither is persuasive.

First, Glover and the dissent argue that Deputy Mehrer's inference was unreasonable because it was not grounded in his law enforcement training or experience. Nothing in our Fourth Amendment precedent supports the notion that, in determining whether reasonable suspicion exists, an officer can draw inferences based on knowledge gained only through law enforcement training and experience. We have repeatedly recognized the opposite. In *Navarette,* we noted a number of behaviors—including driving in the median, crossing the center line on a highway, and swerving—that as a matter of common sense provide "sound indicia of drunk driving.”…. The inference that the driver of a car is its registered owner does not require any specialized training; rather, it is a reasonable inference made by ordinary people on a daily basis.

The dissent reads our cases differently, contending that they permit an officer to use only the common sense derived from his "experiences in law enforcement." Such a standard defies the "common sense" understanding of common sense, *i.e.,* information that is accessible to people generally, not just some specialized subset of society. More importantly, this standard appears nowhere in our precedent. In fact, we have stated that reasonable suspicion is an "abstract" concept that cannot be reduced to "a neat set of legal rules," and we have repeatedly rejected courts' efforts to impose a rigid structure on the concept of reasonableness, This is precisely what the dissent's rule would do by insisting that officers must be treated as bifurcated persons, completely precluded from drawing factual inferences based on the commonly held knowledge they have acquired in their everyday lives.

The dissent's rule would also impose on police the burden of pointing to specific training materials or field experiences justifying reasonable suspicion for the myriad infractions in municipal criminal codes. And by removing common sense as a source of evidence, the dissent would considerably narrow the daylight between the showing required for probable cause and the "less stringent" showing required for reasonable suspicion. Finally, it would impermissibly tie a traffic stop's validity to the officer's length of service. Such requirements are inconsistent with our Fourth Amendment jurisprudence, and we decline to adopt them here.

In reaching this conclusion, we in no way minimize the significant role that specialized training and experience routinely play in law enforcement investigations. We simply hold that such experience is not required in every instance.

Glover and the dissent also contend that adopting Kansas' view would eviscerate the need for officers to base reasonable suspicion on "specific and articulable facts" particularized to the individual, because police could instead rely exclusively on probabilities. Their argument carries little force.

As an initial matter, we have previously stated that officers, like jurors, may rely on probabilities in the reasonable suspicion context. Moreover, as explained above, Deputy Mehrer did not rely exclusively on probabilities. He knew that the license plate was linked to a truck matching the observed vehicle and that the registered owner of the vehicle had a revoked license. Based on these minimal facts, he used common sense to form a reasonable suspicion that a specific individual was potentially engaged in specific criminal activity —driving with a revoked license. Traffic stops of this nature do not delegate to officers "broad and unlimited discretion" to stop drivers at random. Nor do they allow officers to stop drivers whose conduct is no different from any other driver's. Accordingly, combining database information and commonsense judgments in this context is fully consonant with this Court's Fourth Amendment precedents.

This Court's precedents have repeatedly affirmed that "`the ultimate touchstone of the Fourth Amendment is "reasonableness."'" Under the totality of the circumstances of this case, Deputy Mehrer drew an entirely reasonable inference that Glover was driving while his license was revoked.

We emphasize the narrow scope of our holding. Like all seizures, "[t]he officer's action must be `justified at its inception.”. "The standard takes into account the totality of the circumstances —the whole picture." As a result, the presence of additional facts might dispel reasonable suspicion. For example, if an officer knows that the registered owner of the vehicle is in his mid-sixties but observes that the driver is in her mid-twenties, then the totality of the circumstances would not "raise a suspicion that the particular individual being stopped is engaged in wrongdoing." "`[E]ach case is to be decided on its own facts and circumstances.'" Here, Deputy Mehrer possessed no exculpatory information—let alone sufficient information to rebut the reasonable inference that Glover was driving his own truck—and thus the stop was justified.

Under this Court's precedents, the Fourth Amendment permits an officer to initiate a brief investigative traffic stop when he has "a particularized and objective basis for suspecting the particular person stopped of criminal activity." "Although a mere `hunch' does not create reasonable suspicion, the level of suspicion the standard requires is considerably less than proof of wrongdoing by a preponderance of the evidence, and obviously less than is necessary for probable cause."

Because it is a "less demanding" standard, "reasonable suspicion can be established with information that is different in quantity or content than that required to establish probable cause." The standard "depends on the factual and practical considerations of everyday life on which reasonable and prudent men*,* not legal technicians, act." Courts "cannot reasonably demand scientific certainty ... where none exists." Rather, they must permit officers to make "commonsense judgments and inferences about human behavior."

In reaching this conclusion, we in no way minimize the significant role that specialized training and experience routinely play in law enforcement investigations. We simply hold that such experience is not required in every instance.

For the foregoing reasons, we reverse the judgment of the Kansas Supreme Court, and we remand the case for further proceedings not inconsistent with this opinion.

*It is so ordered.*

**Justice KAGAN, with whom Justice GINSBURG joins, concurring.**

When you see a car coming down the street, your common sense tells you that the registered owner may well be behind the wheel. Not always, of course. Families share cars; friends borrow them. Still, a person often buys a vehicle to drive it himself. So your suspicion that the owner is driving would be perfectly reasonable.

Now, though, consider a wrinkle: Suppose you knew that the registered owner of the vehicle no longer had a valid driver's license. That added fact raises a new question. What are the odds that someone who has lost his license would continue to drive? The answer is by no means obvious. You might think that a person told not to drive on pain of criminal penalty would obey the order—so that if his car was on the road, someone else (a family member, a friend) must be doing the driving. Or you might have the opposite intuition—that a person's reasons for driving would overcome his worries about violating the law, no matter the possible punishment. But most likely (let's be honest), you just wouldn't know. Especially if you've not had your own license taken away, your everyday experience has given you little basis to assess the probabilities. Your common sense can therefore no longer guide you.

Even so, Deputy Mark Mehrer had reasonable suspicion to stop the truck in this case, and I join the Court's opinion holding as much. Crucially for me, Mehrer knew yet one more thing about the vehicle's registered owner, and it related to his proclivity for breaking driving laws. As the Court recounts, Mehrer learned from a state database that Charles Glover, the truck's owner, had had his license revoked under Kansas law. And Kansas almost never revokes a license except for serious or repeated driving offenses. Crimes like vehicular homicide and manslaughter, or vehicular flight from a police officer, provoke a license revocation; so too do multiple convictions for moving traffic violations within a short time. In other words, a person with a revoked license has already shown a willingness to flout driving restrictions. That fact, as the Court states, provides a "reason[] to infer" that such a person will drive without a license—at least often enough to warrant an investigatory stop. And there is nothing else here to call that inference into question. That is because the parties' unusually austere stipulation confined the case to the facts stated above—*i.e.,* that Mehrer stopped Glover's truck because he knew that Kansas had revoked Glover's license.

But as already suggested, I would find this a different case if Kansas had barred Glover from driving on a ground that provided no similar evidence of his penchant for ignoring driving laws. Consider, for example, if Kansas had suspended rather than revoked Glover's license. Along with many other States, Kansas suspends licenses for matters having nothing to do with road safety, such as failing to pay parking tickets, court fees, or child support. Indeed, several studies have found that most license suspensions do not relate to driving at all; what they most relate to is being poor. So the good reason the Court gives for thinking that someone with a revoked license will keep driving—that he has a history of disregarding driving rules—would no longer apply. And without that, the case for assuming that an unlicensed driver is at the wheel is hardly self-evident. It would have to rest on an idea about the frequency with which even those who had previously complied with driving laws would defy a State's penalty-backed command to stay off the roads. But where would that idea come from? As discussed above, I doubt whether our collective common sense could do the necessary work. Or otherwise said, I suspect that any common sense invoked in this altered context would not much differ from a "mere `hunch'"—and so "not create reasonable suspicion."

And even when, as under the revocation scheme here, a starting presumption of reasonable suspicion makes sense, the defendant may show that in his case additional information dictates the opposite result….*The Court offers a clear example of observational evidence dispelling reasonable suspicion: if the officer knows the registered owner of a vehicle is an elderly man, but can see the driver is a young woman. Similarly (if not as cut-and-dry), when the officer learns a car has two or more registered owners, the balance of circumstances may tip away from reasonable suspicion that the one with the revoked license is driving. And so too, the attributes of the car may be relevant. Consider if a car bears the markings of a peer-to-peer car sharing service; or compare the likelihoods that someone other than the registered owner is driving (1) a family minivan and (2) a Ferrari. The officer himself may have a wealth of accumulated information about such matters, and the defendant may probe what that knowledge suggests about the stop at issue.*

*Such a challenge may also use statistical evidence, which is almost daily expanding in sophistication and scope. States or municipalities often keep information about "hit rates" in stops like this one—in other words, the frequency with which those stops discover unlicensed drivers behind the wheel. Somewhat less direct but also useful are state and local data (collected by governments, insurance companies, and academics alike) about the average number of drivers* for each registered automobile and the extent to which unlicensed persons continue to drive. Here too, defendants may question testifying officers about such information. Indeed, an officer may have his own hit rate, which if low enough could itself negate reasonable suspicion.

**SOTOMAYOR, J. dissenting.**

The majority flips the burden of proof. It permits Kansas police officers to effectuate roadside stops whenever they lack "information negating an inference" that a vehicle's unlicensed owner is its driver. This has it backwards: The State shoulders the burden to supply the key inference that tethers observation to suspicion. The majority repeatedly attributes such an inference to Deputy Mehrer. But that is an after-the-fact gloss on a seven-paragraph stipulation.

The consequence of the majority's approach is to absolve officers from any responsibility to investigate the identity of a driver where feasible. But that is precisely what officers ought to do—and are more than capable of doing. Of course, some circumstances may not warrant an officer approaching a car to take a closer look at its occupants. But there are countless other instances where officers have been able to ascertain the identity of a driver from a distance and make out their approximate age and gender. Indeed, our cases are rife with examples of officers who have perceived more than just basic driver demographics….. The majority underestimates officers' capabilities and instead gives them free rein to stop a vehicle involved in no suspicious activity simply because it is registered to an unlicensed person. That stop is based merely on a guess or a "hunch" about the driver's identity.

With no basis in the record to presume that unlicensed drivers routinely continue driving, the majority endeavors to fill the gap with its own "common sense. "But simply labeling an inference "common sense" does not make it so, no matter how many times the majority repeats it. Whether the driver of a vehicle is likely to be its unlicensed owner is "by no means obvious." And like the concurrence, I "doubt" that our collective judicial common sense could answer that question, even if our Fourth Amendment jurisprudence allowed us to do so.

Contrary to the majority's claims, the reasonable-suspicion inquiry does not accommodate the average person's intuition. Rather, it permits reliance on a particular type of common sense—that of the reasonable officer, developed through her experiences in law enforcement. This approach acknowledges that what may be "common sense" to a layperson may not be relevant (or correct) in a law enforcement context. Indeed, this case presents the type of geographically localized inquiry where an officer's "inferences and deductions that might well elude an untrained person" would come in handy. By relying on judicial inferences instead, the majority promotes broad, inflexible rules that overlook regional differences.

Allowing judges to offer their own brand of common sense where the State's proffered justifications for a search come up short also shifts police work to the judiciary. Our cases—including those the majority cites—have looked to officer sensibility to establish inferences about human behavior, even though they just as easily could have relied on the inferences "made by ordinary people on a daily basis." to identify a suspicious traveler. There is no reason to depart from that practice here.

Finally, to bolster its conclusion as grounded in "common experience," the majority cites "empirical studies." But its use of statistics illustrates the danger of relying on large-scale data to carry out what is supposed to be a particularized exercise. As the concurrence recognizes, while statistics may help a defendant challenge the reasonableness of an officer's actions, they "cannot substitute for the individualized suspicion that the Fourth Amendment requires." If courts do not scrutinize officer observation or expertise in the reasonable-suspicion analysis, then seizures may be made on large-scale data alone—data that say nothing about the individual save for the class to which he belongs. That analytical approach strays far from "acting upon observed violations" of law—which this Court has said is the "foremost method of enforcing traffic and vehicle safety regulations." The majority today has paved the road to finding reasonable suspicion based on nothing more than a demographic profile. Its logic has thus made the State's task all but automatic. That has never been the law, and it never should be.

In fact, it is the majority's approach that makes scant policy sense. If the State need not set forth all the information its officers considered before forming suspicion, what conceivable evidence could be used to mount an effective challenge to a vehicle stop, as the concurrence imagines? Who could meaningfully interrogate an officer's action when all the officer has to say is that the vehicle was registered to an unlicensed driver? How would a driver counter that evidence—by stating that they were of a different age or gender than the owner and insisting that the officer could have easily discerned that? And where would a defendant bring his arguments if the trial judge makes the key inference, or by the same token, fails to make an inference that "might well elude" the untrained?.

Moreover, the majority's distinction between revocation and suspension may not hold up in other jurisdictions. For one, whether drivers with suspended licenses have "demonstrated a disregard for the law or are categorically unfit to drive" is completely unknown. And in several States, the grounds for revocation. In yet other jurisdictions, "revocation" is the label assigned to a temporary sanction, which may be imposed for such infractions as the failure to comply with child support payments.). Whether the majority's "common sense" assumptions apply outside of Kansas is thus open to challenge.

Vehicle stops "interfere with freedom of movement, are inconvenient, and consume time." Worse still, they "may create substantial anxiety" through an "unsettling show of authority *.* Before subjecting motorists to this type of investigation, the State must possess articulable facts and officer inferences to form suspicion. The State below left unexplained key components of the reasonable-suspicion inquiry. In an effort to uphold the conviction, the Court destroys Fourth Amendment jurisprudence that requires individualized suspicion. I respectfully dissent.

**QUESTIONS FOR DISCUSSION**

1. What are the facts *Glove*r?
2. Why is the Kansas license-revocation scheme of significance?

3. Why does the Court cite statistics on drivers with suspended or revoked licenses? 4. What difference does it make whether police officers base reasonable suspicion on reasonable inferences made by ordinary persons in addition to law enforcement experience and training. 5. Can you explain why Justice Sotomayor writes that the majority decision is providing an :”after-the-fact gloss” to justify the decision of Deputy Mark Mehre to stop Charles Glover? 6. Why does she argue that the decision in Glover allows reasonable suspicion to be based on factors other than the individual actions of a motorist? Is she correct that Deputy Mehre relied on nothing more than a “hunch” or “intuition” is stopping Charles Glover?

7. Justice Sotomayor makes the provocative statement that the decision in Glover opens the door to the unsettling prospect of racial profiling. Do you agree?

# DID THE POLICE OFFICER HAVE REASONABLE SUSPICION TO STOP THE DEFENDANT’S VEHICLE?

LORENZO PRADO NAVARETTE AND JOSE PRADONA VARETTE, PETITIONERS v. CALIFORNIA (2014)

Thomas, J.

**Issue**

After a 911 caller reported that a vehicle had run her off the road, a police officer located the vehicle she identified during the call and executed a traffic stop. Did the police officer have reasonable suspicion to stop the defendant’s vehicle?

Facts

On August 23, 2008, a Mendocino County 911 dispatch team for the California Highway Patrol (CHP) received a call from another CHP dispatcher in neighboring Humboldt County. The Humboldt County dispatcher relayed a tip from a 911 caller, which the Mendocino County team recorded as follows: “ ‘Showing southbound Highway 1 at mile marker 88, Silver Ford 150 pickup. Plate of 8-David-94925. Ran the reporting party off the roadway and was last seen approximately five [minutes] ago.’ ”. The Mendocino County team then broadcast that information to CHP officers at 3:47 p.m.
 A CHP officer heading northbound toward the reported vehicle responded to the broadcast. At 4:00 p.m., the officer passed the truck near mile marker 69. At about 4:05 p.m., after making a U-turn, he pulled the truck over. A second officer, who had separately responded to the broadcast, also arrived on the scene. As the two officers approached the truck, they smelled marijuana. A search of the truck bed revealed 30 pounds of marijuana. The officers arrested the driver, petitioner Lorenzo Prado Navarette, and the passenger, petitioner José Prado Navarette.
 Petitioners moved to suppress the evidence, arguing that the traffic stop violated the Fourth Amendment because the officer lacked reasonable suspicion of criminal activity. Both the magistrate who presided over the suppression hearing and the Superior Court disagreed.Petitioners pleaded guilty to transporting marijuana and were sentenced to 90 days in jail plus three years ofprobation.
 The California Court of Appeal affirmed, concluding that the officer had reasonable suspicion to conduct an investigative stop. …The California Supreme Court denied review.

**Reasoning**

The Fourth Amendment permits brief investigative stops—such as the traffic stop in this case—when a law enforcement officer has “a particularized and objective basis for suspecting the particular person stopped of criminal activity.” The “reasonable suspicion” necessary to justify such a stop “is dependent upon both the content of information possessed by police and its degree of reliability.” The standard takes into account “the totality of the circumstances—the whole picture.” Although a mere “ ‘hunch’ ” does not create reasonable suspicion, the level of suspicion the standard requires is “considerably less than proof of wrongdoing by a preponderance of the evidence,” and “obviously less” than is necessary for probable cause.
 These principles apply with full force to investigative stops based on information from anonymous tips. We have firmly rejected the argument “that reasonable cause for a[n investigative stop] can only be based on the officer’s personal observation, rather than on information supplied by another person.” Of course, “an anonymous tip alone seldom demonstrates the informant’s basis of knowledge or veracity.” That is because “ordinary citizens generally do not provide extensive recitations of the basis of their everyday observations,” and an anonymous tipster’s veracity is “ ‘by hypothesis largely unknown, and unknowable.’ ” But under appropriate circumstances, an anonymous tip can demonstrate “sufficient indicia of reliability to provide reasonable suspicion to make [an] investigatory stop.”
 Our decisions in Alabama v. White, and Florida v. J. L. are useful guides. In White, an anonymous tipster told the police that a woman would drive from a particular apartment building to a particular motel in a brown Plymouth station wagon with a broken right tail light. The tipster further asserted that the woman would be transporting cocaine. After confirming the innocent details, officers stopped the station wagon as it neared the motel and found cocaine in the vehicle. We held that the officers’ corroboration of certain details made the anonymous tip sufficiently reliable to create reasonable suspicion of criminal activity. By accurately predicting future behavior, the tipster demonstrated “a special familiarity with respondent’s affairs,” which in turn implied that the tipster had “access to reliable information about that individual’s illegal activities.” We also recognized that an informant who is proved to tell the truth about some things is more likely to tell the truth about other things, “including the claim that the object of the tip is engaged in criminal activity.”
 In J. L., by contrast, we determined that no reasonable suspicion arose from a bare-bones tip that a young black male in a plaid shirt standing at a bus stop was carrying a gun. The tipster did not explain how he knew about the gun, nor did he suggest that he had any special familiarity with the young man’s affairs. As a result, police had no basis for believing “that the tipster ha[d] knowledge of concealed criminal activity.” Furthermore, the tip included no predictions of future behavior that could be corroborated to assess the tipster’s credibility. We accordingly concluded that the tip was insufficiently reliable to justify a stop and frisk.
 The initial question in this case is whether the 911 call was sufficiently reliable to credit the allegation that petitioners’ truck “ran the [caller] off the roadway.” Even assuming for present purposes that the 911 call was anonymous, we conclude that the call bore adequate indicia of reliability for the officer to credit the caller’s account. The officer was therefore justified in proceeding from the premise that the truck had, in fact, caused the caller’s car to be dangerously diverted from the highway.
 By reporting that she had been run off the road by a specific vehicle—a silver Ford F-150 pickup, license plate 8D94925—the caller necessarily claimed eyewitness knowledge of the alleged dangerous driving. That basis of knowledge lends significant support to the tip’s reliability. “An informant’s] explicit and detailed description of alleged wrongdoing, along with a statement that the event was observed firsthand, entitles his tip to greater weight than might otherwise be the case”. A tip of illegal gambling is less reliable when “it is not alleged that the informant personally observed [the defendant] at work or that he had ever placed a bet with him”). This is in contrast to J. L., where the tip provided no basis for concluding that the tipster had actually seen the gun. Even in White, where we upheld the stop, there was scant evidence that the tipster had actually observed cocaine in the station wagon. We called White a “ ‘close case’ ” because “[k]nowledge about a person’s future movements indicates some familiarity with that person’s affairs, but having such knowledge does not necessarily imply that the informant knows, in particular, whether that person is carrying hidden contraband.” A driver’s claim that another vehicle ran her off the road, however, necessarily implies that the informant knows the other car was driven dangerously.
 There is also reason to think that the 911 caller in this case was telling the truth. Police confirmed the truck’s location near mile marker 69 (roughly 19 highway miles south of the location reported in the 911 call) at 4:00 p.m. (roughly 18 minutes after the 911 call). That timeline of events suggests that the caller reported the incident soon after she was run off the road. That sort of contemporaneous report has long been treated as especially reliable. In evidence law, we generally credit the proposition that statements about an event and made soon after perceiving that event are especially trustworthy because “substantial contemporaneity of event and statement negate the likelihood of deliberate or conscious misrepresentation.” A similar rationale applies to a “statement relating to a startling event”—such as getting run off the road—“made while the declarant was under the stress of excitement that it caused.” Unsurprisingly, 911 calls that would otherwise be inadmissible hearsay have often been admitted on those grounds. There was no indication that the tip in J. L. (or even in White) was contemporaneous with the observation of criminal activity or made under the stress of excitement caused by a startling event, but those considerations weigh in favor of the caller’s veracity here.
 Another indicator of veracity is the caller’s use of the 911 emergency system. A 911 call has some features that allow for identifying and tracing callers, and thus provide some safeguards against making false reports with immunity. As this case illustrates, 911 calls can be recorded, which provides victims with an opportunity to identify the false tipster’s voice and subject him to prosecution, The 911 system also permits law enforcement to verify important information about the caller. In 1998, the Federal Communications Commission (FCC) began to require cellular carriers to relay the caller’s phone number to 911 dispatchers. Beginning in 2001, carriers have been required to identify the caller’s geographic location with increasing specificity. And although callers may ordinarily block call recipients from obtaining their identifying information, FCC regulations exempt 911 calls from that privilege. None of this is to suggest that tips in 911 calls are per se reliable. Given the foregoing technological and regulatory developments, however, a reasonable officer could conclude that a false tipster would think twice before using such a system. The caller’s use of the 911 system is therefore one of the relevant circum-stances that, taken together, justified the officer’s reliance on the information reported in the 911 call.
 Even a reliable tip will justify an investigative stop only if it creates reasonable suspicion that “criminal activity may be afoot.” We must therefore determine whether the 911 caller’s report of being run off the roadway created reasonable suspicion of an ongoing crime such as drunk driving as opposed to an isolated episode of past recklessness. “An investigatory stop must be justified by some objective manifestation that the person stopped is, or is about to be, engaged in criminal activity.” We conclude that the behavior alleged by the 911 caller, “viewed from the standpoint of an objectively reasonable police officer, amount[s] to reasonable suspicion” of drunk driving. The stop was therefore proper.

Reasonable suspicion depends on the factual and practical considerations of everyday life on which reason-able and prudent men, not legal technicians, act….. Under that commonsense approach, we can appropriately recognize certain driving behaviors as sound indicia of drunk driving. Of course, not all traffic infractions imply intoxication. Unconfirmed reports of driving without a seatbelt or slightly over the speed limit, for example, are so tenuously connected to drunk driving that a stop on those grounds alone would be constitutionally suspect. But a reliable tip alleging the dangerous behaviors discussed above generally would justify a traffic stop on suspicion of drunk driving.
 The 911 caller in this case reported more than a minor traffic infraction and more than a conclusory allegation of drunk or reckless driving. Instead, she alleged a specific and dangerous result of the driver’s conduct: running another car off the highway. That conduct bears too great a resemblance to paradigmatic manifestations of drunk driving to be dismissed as an isolated example of recklessness. Running another vehicle off the road suggests lane-positioning problems, decreased vigilance, impaired judgment, or some combination of those recognized drunk driving cues. And the experience of many officers suggests that a driver who almost strikes a vehicle or another object—the exact scenario that ordinarily causes “running [another vehicle] off the roadway”—is likely intoxicated. As a result, we cannot say that the officer acted unreasonably under these circumstances in stopping a driver whose alleged conduct was a significant indicator of drunk driving.
 Petitioners’ attempts to second-guess the officer’s reasonable suspicion of drunk driving are unavailing. It is true that the reported behavior might also be explained by, for example, a driver responding to “an unruly child or other distraction.” But we have consistently recognized that reasonable suspicion “need not rule out the possibility of innocent conduct.”
 Nor did the absence of additional suspicious conduct, after the vehicle was first spotted by an officer, dispel the reasonable suspicion of drunk driving. It is hardly surprising that the appearance of a marked police car would inspire more careful driving for a time. Extended observation of an allegedly drunk driver might eventually dispel a reasonable suspicion of intoxication, but the 5-minute period in this case hardly sufficed in that regard. Of course, an officer who already has such a reasonable suspicion need not surveil a vehicle at length in order to personally observe suspicious driving. Once reasonable suspicion of drunk driving arises, “[t]he reasonableness of the officer’s decision to stop a suspect does not turn on the availability of less intrusive investigatory techniques.” This would be a particularly inappropriate context to depart from that settled rule, because allowing a drunk driver a second chance for dangerous conduct could have disastrous consequences.

**Holding**

Like White, this is a “close case.” As in that case, the indicia of the 911 caller’s reliability here are stronger than those in J. L., where we held that a bare-bones tip was unreliable. Although the indicia present here are different from those we found sufficient in White, there is more than one way to demonstrate “a particularized and objective basis for suspecting the particular person stopped of criminal activity.” Under the totality of the circumstances, we find the indicia of reliability in this case sufficient to provide the officer with reasonable suspicion that the driver of the reported vehicle had run another vehicle off the road. That made it reasonable under the circumstances for the officer to execute a traffic stop. We accordingly affirm.

**Scalia. J., with whom Justice Ginsburg, Justice Sotomayor, and Justice Kagan join, dissenting.**

The California Highway Patrol in this case knew nothing about the tipster on whose word—and that alone—they seized Lorenzo and José Prado Navarette. They did not know her name.They did not know her phone number or address. They did not even know where she called from (she may have dialed in from a neighboring county,

The question before us, the Court agrees, is whether the “content of information possessed by police and its degree of reliability,” White, gave the officers reasonable suspicion that the driver of the truck (Lorenzo) was committing an ongoing crime. When the only source of the government’s information is an informant’s tip, we ask whether the tip bears sufficient “ ‘indicia of reliability,’ ” to establish “a particularized and objective basis for suspecting the particular person stopped of criminal activity.”
 The most extreme case, before this one, in which an anonymous tip was found to meet this standard was White. There the reliability of the tip was established by the fact that it predicted the target’s behavior in the finest detail—a detail that could be known only by someone familiar with the target’s business: She would, the tipster said, leave a particular apartment building, get into a brown Plymouth station wagon with a broken right tail light, and drive immediately to a particular motel. Very few persons would have such intimate knowledge, and hence knowledge of the unobservable fact that the woman was carrying unlawful drugs was plausible. Here the Court makes a big deal of the fact that the tipster was dead right about the fact that a silver Ford F-150 truck (license plate 8D94925) was traveling south on Highway 1 somewhere near mile marker 88. But everyone in the world who saw the car would have that knowledge, and anyone who wanted the car stopped would have to provide that information. Unlike the situation in White, that generally available knowledge in no way makes it plausible that the tipster saw the car run someone off the road.
 The Court says that “[b]y reporting that she had been run off the road by a specific vehicle . . . the caller necessarily claimed eyewitness knowledge.” So what? The issue is not how she claimed to know, but whether what she claimed to know was true. The claim to “eyewitness knowledge” of being run off the road supports not at all its veracity; nor does the amazing, mystifying prediction (so far short of what existed in White) that the petitioners’ truck would be heading south on Highway 1.
 The Court finds “reason to think” that the informant “was telling the truth” in the fact that police observation confirmed that the truck had been driving near the spot at which, and at the approximate time at which, the tipster alleged she had been run off the road. According to the Court, the statement therefore qualifies as a “ ‘present sense impression’ ” or “ ‘excited utterance,’ ” kinds of hearsay that the law deems categorically admissible given their low likelihood of reflecting “ ‘deliberate or conscious misrepresentation.’ ” So, the Court says, we can fairly suppose that the accusation was true.

No, we cannot. To begin with, it is questionable whether either the “present sense impression” or the “excited utterance” exception to the hearsay rule applies here. The classic “present sense impression” is the recounting of an event that is occurring before the declarant’s eyes, as the declarant is speaking (“I am watching the Hindenburg explode!”).. And the classic “excited utterance” is a statement elicited, almost involuntarily, by the shock of what the declarant is immediately witnessing. It is the immediacy that gives the statement some credibility; the declarant has not had time to dissemble or embellish. There is no such immediacy here. The declarant had time to observe the license number of the offending vehicle, 8D94925, a difficult task if she was forced off the road and the vehicle was speeding away, to bring her car to a halt, to copy down the observed license number (presumably, and if she was using her own cell phone) to dial a call to the police from the stopped car. Plenty of time to dissemble or embellish.
 Moreover, even assuming that less than true immediacy will suffice for these hearsay exceptions to apply, the tipster’s statement would run into additional barriers to admissibility and acceptance. According to the very Advisory Committee’s Notes from which the Court quotes, cases addressing an unidentified declarant’s present sense impression “indicate hesitancy in upholding the statement alone as sufficient” proof of the reported event.. For excited utterances as well, the “knotty theoretical” question of statement-alone admissibility persists—seemingly even when the declarant is known. “Some courts . . . have taken the position that an excited utterance is admissible only if other proof is presented which supports a finding of fact that the exciting event did occur. The issue has not yet been resolved under the Federal Rules.” It is even unsettled whether excited utterances of an unknown declarant are ever admissible. A leading treatise reports that “the courts have been reluctant to admit such statements, principally because of uncertainty that foundational requirements, including the impact of the event on the declarant, have been satisfied.” In sum, it is unlikely that the law of evidence would deem the mystery caller in this case “especially trustworthy.”
 Finally, and least tenably, the Court says that another “indicator of veracity” is the anonymous tipster’s mere “use of the 911 emergency system,” ante, at 7. Because, you see, recent “technological and regulatory developments” suggest that the identities of unnamed 911 callers are increasingly less likely to remain unknown. Indeed, the systems are able to identify “the caller’s geographic location with increasing specificity.” The Amici disagree with this, and the present case surely suggests that amici are right—since we know neither the identity of the tipster nor even the county from which the call was made. But assuming the Court is right about the ease of identifying 911 callers, it proves absolutely nothing in the present case unless the anonymous caller was aware of that fact. “It is the tipster’s belief in anonymity, not its reality, that will control his behavior.” There is no reason to believe that your average anonymous 911 tipster is aware that 911 callers are readily identifiable.
 All that has been said up to now assumes that the anonymous caller made, at least in effect, an accusation of drunken driving. But in fact she did not. She said that the petitioners’ truck “ ‘[r]an [me] off the roadway.’ ” hat neither asserts that the driver was drunk nor even raises the likelihood that the driver was drunk. The most it conveys is that the truck did some apparently nontypical thing that forced the tipster off the roadway, whether partly or fully, temporarily or permanently. Who really knows what (if anything) happened? The truck might have swerved to avoid an animal, a pothole, or a jaywalking pedestrian.
 But let us assume the worst of the many possibilities: that it was a careless, reckless, or even intentional maneuver that forced the tipster off the road. Lorenzo might have been distracted by his use of a hands-free cell phone, or distracted by an intense sports argument with José. Or, indeed, he might have intentionally forced the tipster off the road because of some personal animus, or hostility to her “Make Love, Not War” bumper sticker. I fail to see how reasonable suspicion of a discreteinstance of irregular or hazardous driving generates a reasonable suspicion of ongoingintoxicated driving. What proportion of the hundreds of thousands—perhaps millions—of careless, reckless, or intentional traffic violations committed each day is attributable to drunken drivers? I say 0.1 percent. I have no basis for that except my own guesswork. But unless the Court has some basis in reality to believe that the proportion is many orders of magnitude above that—say 1 in 10 or at least 1 in 20—it has no grounds for its unsupported assertion that the tipster’s report in this case gave rise to a reasonable suspicion of drunken driving.
 Bear in mind that that is the only basis for the stop that has been asserted in this litigation. The stop required suspicion of an ongoing crime, not merely suspicion of having run someone off the road earlier. And driving while being a careless or reckless person, unlike driving while being a drunk person, is not an ongoing crime. In other words, in order to stop the petitioners the officers here not only had to assume without basis the accuracy of the anonymous accusation but also had to posit an unlikely reason (drunkenness) for the accused behavior.
 In sum, at the moment the police spotted the truck, it was more than merely “possib[le]” that the petitioners were not committing an ongoing traffic crime. It was overwhelmingly likely that they were not.
 It gets worse. Not only, it turns out, did the police have no good reason at first to believe that Lorenzo was driving drunk, they had very good reason at last to know that he was not. The Court concludes that the tip, plus confirmation of the truck’s location, produced reasonable suspicion that the truck not only had been but still was barreling dangerously and drunkenly down Highway 1. In fact, alas, it was not, and the officers knew it. They followed the truck for five minutes, presumably to see if it was being operated recklessly. And was good police work. While the anonymous tip was not enough to support a stop for drunken driving under Terry v. Ohio, it was surely enough to counsel observation of the truck to see if it was driven by a drunken driver. But the pesky little detail left out of the Court’s reasonable-suspicion equation is that, for the five minutes that the truck was being followed (five minutes is a long time), Lorenzo’s driving was irreproachable. Had the officers witnessed the petitioners violate a single traffic law, they would have had cause to stop the truck, Whren v. United States, and this case would not be before us. And not only was the driving irreproachable, but the State offers no evidence to suggest that the petitioners even did anything suspicious, such as suddenly slowing down, pulling off to the side of the road, or turning somewhere to see whether they were being followed. Consequently, the tip’s suggestion of ongoing drunken driving (if it could be deemed to suggest that) not only went uncorroborated; it
 A hypothetical variation on the facts of this case illustrates the point. Suppose an anonymous tipster reports that, while following near mile marker 88 a silver FordF-150, license plate 8D949925, traveling southbound on Highway 1, she saw in the truck’s open cab several five-foot-tall stacks of what was unmistakably baled cannabis. Two minutes later, a highway patrolman spots the truck exactly where the tip suggested it would be, begins following it, but sees nothing in the truck’s cab. It is not enough to say that the officer’s observation merely failed to corroborate the tipster’s accusation. It is more precise to say that the officer’s observation discreditedthe informant’s accusation: The crime was supposedly occurring (and would continue to occur) in plain view, but the police saw nothing. Similarly, here, the crime supposedly suggested by the tip was ongoing intoxicated driving, the hallmarks of which are many, readily identifiable, and difficult to conceal. That the officers witnessed nary a minor traffic violation nor any other “sound indici[um] of drunk driving,” strongly suggests that the suspected crime was not occurring after all. The tip’s implication of continuing criminality, already weak, grew even weaker.
 Resisting this line of reasoning, the Court curiously asserts that, since drunk drivers who see marked squad cars in their rearview mirrors may evade detection simply by driving “more careful[ly],” the “absence of additional suspicious conduct” is “hardly surprising” and thus largely irrelevant. Whether a drunk driver drives drunkenly, the Court seems to think, is up to him. That is not how I understand the influence of alcohol. I subscribe to the more traditional view that the dangers of intoxicated driving are the intoxicant’s impairing effects on the body—effects that no mere act of the will can resist. Consistent with this view, I take it as a fundamental premise of our intoxicated-driving laws that a driver soused enough to swerve once can be expected to swerve again—and soon. If he does not, and if the only evidence of his first episode of irregular driving is a mere inference from an uncorroborated, vague, and nameless tip, then the Fourth Amendment requires that he be left alone.
 The Court’s opinion serves up a freedom-destroying cocktail consisting of two parts patent falsity: (1) that anonymous 911 reports of traffic violations are reliable so long as they correctly identify a car and its location, and (2) that a single instance of careless or reckless driving necessarily supports a reasonable suspicion of drunkenness. All the malevolent 911 caller need do is assert a traffic violation, and the targeted car will be stopped, forcibly if necessary, by the police. If the driver turns out not to be drunk which will almost always be the case, the caller need fear no consequences, even if 911 knows his identity. After all, he never alleged drunkenness, but merely called in a traffic violation—and on that point his word is as good as his victim’s.
 Drunken driving is a serious matter, but so is the loss of our freedom to come and go as we please without police interference. To prevent and detect murder we do not allow searches without probable cause or targeted Terry stops without reasonable suspicion. We should not do so for drunken driving either. After today’s opinion all of us on the road, and not just drug dealers, are at risk of having our freedom of movement curtailed on suspicion of drunkenness, based upon a phone tip, true or false, of a single instance of careless driving. I respectfully dissent.

# IS THERE A “FIREARM EXCEPTION” THAT PERMITS THE POLICE TO ACT ON AN ANONYMOUS TIP?

*FLORIDA V. J.L.*

529 U.S. 266 (2000)

Ginsburg, J.
**Facts**
On October 13, 1995, an anonymous caller reported to the Miami-Dade Police that a young black male standing at a particular bus stop and wearing a plaid shirt was carrying a gun. So far as the record reveals, there is no audio recording of the tip, and nothing is known about the informant. Sometime after the police received the tip -- the record does not say how long -- two officers were instructed to respond. They arrived at the bus stop about six minutes later and saw three black males "just hanging out [there]." One of the three, respondent J. L., was wearing a plaid shirt. Apart from the tip, the officers had no reason to suspect any of the three of illegal conduct. The officers did not see a firearm, and J. L. made no threatening or otherwise unusual movements. One of the officers approached J. L., told him to put his hands up on the bus stop, frisked him, and seized a gun from J. L.'s pocket. The second officer frisked the other two individuals, against whom no allegations had been made, and found nothing.  
 J. L., who was at the time of the frisk "10 days shy of his 16th birthday," was charged under state law with carrying a concealed firearm without a license and possessing a firearm while under the age of 18. He moved to suppress the gun as the fruit of an unlawful search, and the trial court granted his motion. The intermediate appellate court reversed, but the Supreme Court of Florida quashed that decision and held the search invalid under the Fourth Amendment.
**Issue**

Anonymous tips, the Florida Supreme Court stated, are generally less reliable than tips from known informants and can form the basis for reasonable suspicion only if accompanied by specific indicia of reliability, for example, the correct forecast of a subject's "'not easily predicted'" movements. The tip leading to the frisk of J. L., the court observed, provided no such predictions, nor did it contain any other qualifying indicia of reliability. Two justices dissented. The safety of the police and the public, they maintained, justifies a "firearm exception" to the general rule barring investigatory stops and frisks on the basis of bare-boned anonymous tips. Seeking review in this Court, the State of Florida noted that the decision of the State's Supreme Court conflicts with decisions of other courts declaring similar searches compatible with the Fourth Amendment….We now must determine whether to uphold the judgment of the Florida Supreme Court.
**Reasoning**
In the instant case, the officers' suspicion that J. L. was carrying a weapon arose not from any observations of their own but solely from a call made from an unknown location by an unknown caller. Unlike a tip from a known informant whose reputation can be assessed and who can be held responsible if her allegations turn out to be fabricated, “an anonymous tip alone seldom demonstrates the informant's basis of knowledge or veracity." As we have recognized, however, there are situations in which an anonymous tip, suitably corroborated, exhibits "sufficient indicia of reliability to provide reasonable suspicion to make the investigatory stop." The question we here confront is whether the tip pointing to J. L. had those indicia of reliability.
 In *White*, the police received an anonymous tip asserting that a woman was carrying cocaine and predicting that she would leave an apartment building at a specified time, get into a car matching a particular description, and drive to a named motel. Standing alone, the tip would not have justified a *Terry* stop. Only after police observation showed that the informant had accurately predicted the woman's movements, we explained, did it become reasonable to think the tipster had inside knowledge about the suspect and therefore to credit his assertion about the cocaine.  Although the Court held that the suspicion in *White* became reasonable after police surveillance, we regarded the case as borderline. Knowledge about a person's future movements indicates some familiarity with that person's affairs, but having such knowledge does not necessarily imply that the informant knows, in particular, whether that person is carrying hidden contraband. We accordingly classified *White* as a "close case."
 The tip in the instant case lacked the moderate indicia of reliability present in *White* and essential to the Court's decision in that case. The anonymous call concerning J. L. provided no predictive information and therefore left the police without means to test the informant's knowledge or credibility. That the allegation about the gun turned out to be correct does not suggest that the officers, prior to the frisks, had a reasonable basis for suspecting J. L. of engaging in unlawful conduct: The reasonableness of official suspicion must be measured by what the officers knew before they conducted their search. All the police had to go on in this case was the bare report of an unknown, unaccountable informant who neither explained how he knew about the gun nor supplied any basis for believing he had inside information  about J. L. If *White* was a close case on the reliability of anonymous tips, this one surely falls on the other side of the line.
 Florida contends that the tip was reliable because its description of the suspect's visible attributes proved accurate: There really was a young black male wearing a plaid shirt at the bus stop. The United States as *amicus curiae* makes a similar argument, proposing that a stop and frisk should be permitted "when (1) an anonymous tip provides a description of a particular person at a particular location illegally carrying a concealed firearm, (2) police promptly verify the pertinent details of the tip except the existence of the firearm, and (3) there are no factors that cast doubt on the reliability of the tip . . . ." These contentions misapprehend the reliability needed for a tip to justify a *Terry* stop.
  An accurate description of a subject's readily observable location and appearance is of course reliable in this limited sense: It will help the police correctly identify the person whom the tipster means to accuse. Such a tip, however, does not show that the tipster has knowledge of concealed criminal activity. The reasonable suspicion here at issue requires that a tip be reliable in its assertion of illegality, not just in its tendency to identify a determinate person. …
 A second major argument advanced by Florida and the United States as *amicus* is, in essence, that the standard *Terry* analysis should be modified to license a "firearm exception." Under such an exception, a tip alleging an illegal gun would justify a stop and frisk even if the accusation would fail standard pre-search reliability testing. We decline to adopt this position.
 Firearms are dangerous, and extraordinary dangers sometimes justify unusual precautions. Our decisions recognize the serious threat that armed criminals pose to public safety; *Terry*'s rule, which permits protective police searches on the basis of reasonable suspicion rather than demanding that officers meet the higher standard of probable cause, responds to this very concern. But an automatic firearm exception to our established reliability analysis would rove too far. Such an exception would enable any person seeking to harass another to set in motion an intrusive, embarrassing police search of the targeted person simply by placing an anonymous call falsely reporting the target's unlawful carriage of a gun. Nor could one securely confine such an exception to allegations involving firearms.  Several Courts of Appeals have held it *per se* foreseeable for people carrying significant amounts of illegal drugs to be carrying guns as well. If police officers may properly conduct *Terry* frisks on the basis of bare-boned tips about guns, it would be reasonable to maintain under the above-cited decisions that the police should similarly have discretion to frisk based on bare-boned tips about narcotics. As we clarified when we made indicia of reliability critical in *Adams* and *White*, the Fourth Amendment is not so easily satisfied.
 At oral argument, petitioner also advanced the position that J. L.'s youth made the stop and frisk valid, because it is a crime in Florida for persons under the age of 21 to carry concealed firearms. This contention misses the mark. Even assuming that the arresting officers could be sure that J. L. was under 21, they would have had reasonable suspicion that J. L. was engaged in criminal activity only if they could be confident that he was carrying a gun in the first place. The mere fact that a tip, if true, would describe illegal activity does not mean that the police may make a *Terry* stop without meeting the reliability requirement, and the fact that J. L. was under 21 in no way made the gun tip more reliable than if he had been an adult.
**Holding**

The facts of this case do not require us to speculate about the circumstances under which the danger alleged in an anonymous tip might be so great as to justify a search even without a showing of reliability. We do not say, for example, that a report of a person carrying a bomb need bear the indicia of reliability we demand for a report of a person carrying a firearm before the police can constitutionally conduct a frisk. Nor do we hold that public safety officials in quarters where the reasonable expectation of Fourth Amendment privacy is diminished, such as airports, cannot conduct protective searches on the basis of information insufficient to justify searches elsewhere.
 The requirement that an anonymous tip bear standard indicia of reliability in order to justify a stop in no way diminishes a police officer's prerogative, in accord with *Terry*, to conduct a protective search of a person who has already been legitimately stopped. We speak in today's decision only of cases in which the officer's authority to make the initial stop is at issue. In that context, we hold that an anonymous tip lacking indicia of reliability of the kind contemplated in *Adams* and *White* does not justify a stop and frisk whenever and however it alleges the illegal possession of a firearm.

Justice Kennedy with whom the Chief Justice joins, **concurring.**

On the record created at the suppression hearing, the Court's decision is correct. The Court says all that is necessary to resolve this case, and I join the opinion in all respects. It might be noted, however, that there are many indicia of reliability respecting anonymous tips that we have yet to explore in our cases.
 When a police officer testifies that a suspect aroused the officer's suspicion, and so justifies a stop and frisk, the courts can weigh the officer's credibility and admit evidence seized pursuant to the frisk even if no one, aside from the officer and defendant themselves, was present or observed the seizure.  An anonymous telephone tip without more is different, however; for even if the officer's testimony about receipt of the tip is found credible, there is a second layer of inquiry respecting the reliability of the informant that cannot be pursued. If the telephone call is truly anonymous, the informant has not placed his credibility at risk and can lie with impunity. The reviewing court cannot judge the credibility of the informant and the risk of fabrication becomes unacceptable.
 On this record, then, the Court is correct in holding that the telephone tip did not justify the arresting officer's immediate stop and frisk of respondent. There was testimony that an anonymous tip came in by a telephone call and nothing more. The record does not show whether some notation or other documentation of the call was made either by a voice recording or tracing the call to a telephone number. The prosecution recounted just the tip itself and the later verification of the presence of the three young men in the circumstances the Court describes.
 It seems appropriate to observe that a tip might be anonymous in some sense yet have certain other features, either supporting reliability or narrowing the likely class of informants, so that the tip does provide the lawful basis for some police action. One such feature, as the Court recognizes, is that the tip predicts future conduct of the alleged criminal. There may be others. For example, if an unnamed caller with a voice which sounds the same each time tells police on two successive nights about criminal activity which in fact occurs each night, a similar call on the third night ought not be treated automatically like the tip in the case now before us. In the instance supposed, there would be a plausible argument that experience cures some of the uncertainty surrounding the anonymity, justifying a proportionate police response. In today's case, however, the State provides us with no data about the reliability of anonymous tips. Nor do we know whether the dispatcher or arresting officer had any  objective reason to believe that this tip had some particular indicia of reliability.
 If an informant places his anonymity at risk, a court can consider this factor in weighing the reliability of the tip. An instance where a tip might be considered anonymous but nevertheless sufficiently reliable to justify a proportionate police response may be when an unnamed person driving a car the police officer later describes stops for a moment and, face to face, informs the police that criminal activity is occurring. This too seems to be different from the tip in the present case.
 Instant caller identification is widely available to police, and, if anonymous tips are proving unreliable and distracting to police, squad cars can be sent within seconds to the location of the telephone used by the informant. Voice recording of  telephone tips might, in appropriate cases, be used by police to locate the caller. It is unlawful to make false reports to the police, and the ability of the police to trace the identity of anonymous telephone informants may be a factor which lends reliability to what, years earlier, might have been considered unreliable anonymous tips.
 These matters, of course, must await discussion in other cases, where the issues are presented by the record.

**Questions for Discussion**

1. Why did the Supreme Court rule that the informant’s tip lacked the indicia of reliability as compared to the tip in *Alabama v. White.*

2. How does the Supreme Court respond to the argument of Florida and of the United States that the police were justified in relying on the tip.

3. Discuss the Supreme Court’s ruling in regards to Florida’s claim that the court should recognize a “firearm exception.”

4. Are there circumstances in which the Supreme Court should recognize that the public interest justifies the police relying on a tip that lacks the indicial of reliability.

5. **Problems in policing**.What factors should you consider in deciding whether to rely on an informant.

# DOES THE DRUG COURIER PROFILE CONSTITUTE REASONABLE SUSPICION?

*REID V. GEORGIA*

448 U.S. 438 (1980)

Per Curiam

**Facts**
 The relevant facts were determined at the pretrial hearing and may be recounted briefly. The petitioner arrived at the Atlanta Airport on a commercial airline flight from Fort Lauderdale, Fla., in the early morning hours of August 14, 1978. The passengers left the plane in a single file and proceeded through the concourse. The petitioner was observed by an agent of the DEA, who was in the airport for the purpose of uncovering illicit commerce in narcotics. Separated from the petitioner by several persons was another man, who carried a shoulder bag like the one the petitioner carried. As they proceeded through the concourse past the baggage claim area, the petitioner occasionally looked backward in the direction of the second man. When they reached the main lobby of the terminal, the second man caught up with the petitioner and spoke briefly with him. They then left the terminal building together.
 The DEA agent approached them outside of the building, identified himself as a federal narcotics agent, and asked them to show him their airline ticket stubs and identification, which they did. The airline tickets had been purchased with the petitioner's credit card and indicated that the men had stayed in Fort Lauderdale only one day. According to the agent's testimony, the men appeared nervous during the encounter. The agent then asked them if they would agree to return to the terminal and to consent to a search of their persons and their shoulder bags. The agent testified that the petitioner nodded his head affirmatively, and that the other responded, "Yeah, okay." As the three of them entered the terminal, however, the petitioner began to run and before he was apprehended, abandoned his shoulder bag. The bag, when recovered, was found to contain cocaine.
 The Superior Court granted the petitioner's motion to suppress the cocaine, concluding that it had been obtained as a result of a seizure of him by the DEA agent without an articulable suspicion that he was unlawfully carrying narcotics. The Georgia Court of Appeals reversed. It held that the stop of the petitioner was permissible, citing *Terry* v. *Ohio*, since the petitioner, "in a number of respects, fit a 'profile' of drug couriers compiled by the [DEA]." The appellate court also concluded that the petitioner had consented to return to the terminal for a search of his person, and that after he had attempted to flee and had discarded his shoulder bag, there existed probable cause for the search of the bag.
**Issue**

The appellate court's conclusion in this case that the DEA agent reasonably suspected the petitioner of wrongdoing rested on the fact that the petitioner appeared to the agent to fit the so-called "drug courier profile," a somewhat informal compilation of characteristics believed to be typical of persons unlawfully carrying narcotics. Specifically, the court thought  it relevant that (1) the petitioner had arrived from Fort Lauderdale, which the agent testified is a principal place of origin of cocaine sold elsewhere in the country, (2) the petitioner arrived in the early morning, when law enforcement activity is diminished, (3) he and his companion appeared to the agent to be trying to conceal the fact that they were traveling together, and (4) they apparently had no luggage other than their shoulder bags. Was the appellate court correct?
**Reasoning**

We conclude that the agent could not, as a matter of law, have reasonably suspected the petitioner of criminal activity on the basis of these observed circumstances. Of the evidence relied on, only the fact that the petitioner preceded another person and occasionally looked backward at him as they proceeded through the concourse relates to their particular conduct. The other circumstances describe a very large category of presumably innocent travelers, who would be subject to virtually random seizures were the Court to conclude that as little foundation as there was in this case could justify a seizure. Nor can we agree, on this record, that the manner in which the petitioner and his companion walked through the airport reasonably could have led the agent to suspect them of wrongdoing. Although there could, of course, be circumstances in which wholly lawful conduct might justify the suspicion that criminal activity was afoot, this is not such a case. The agent's belief that the petitioner and his companion were attempting to conceal the fact that they were traveling together, a belief that was more an "inchoate and unparticularized suspicion or 'hunch,'" than a fair inference in the light of his experience, is simply too slender a reed to support the seizure in this case.
**Holding**
 For these reasons, the judgment of the appellate court cannot be sustained insofar as it rests on the determination that the DEA agent lawfully seized the petitioner when he approached him outside the airline   terminal. Accordingly, the petition for certiorari is granted, the judgment of the Georgia Court of Appeals is vacated, and the case is remanded to that court for further proceedings not inconsistent with this opinion.
**Questions for Discussion**
1. What was the basis for the DEA agent’s stop of Reid.
2. Why did the court conclude that there was no reasonable suspicion to stop Reid.

3. **Police practices**. Give some examples of the type of factors that you might include in a drug courier profile that would result in the Supreme Court finding reasonable suspicion.

# MAY LAW ENFORCEMENT OFFICERS STOP AN INDIVIDUAL WHO FITS THE DRUG COURIER PROFILE?

*UNITED STATES V. SOKOLOW*

490 U.S. 1 (1989)

Rehinquist, J.

**Issue** 
 Respondent Andrew Sokolow was stopped by Drug Enforcement Administration (DEA) agents upon his arrival at Honolulu International Airport. The agents found 1,063 grams of cocaine in his carry-on luggage. When respondent was stopped, the agents knew, *inter alia*, that (1) he paid $ 2,100 for two airplane tickets from a roll of $ 20 bills; (2) he traveled under a name that  did not match the name under which his telephone number was listed; (3) his original destination was Miami, a source city for illicit drugs; (4) he stayed in Miami for only 48 hours, even though a round-trip flight from Honolulu to Miami takes 20 hours; (5) he appeared nervous during his trip; and (6) he checked none of his luggage. A divided panel of the United States Court of Appeals for the Ninth Circuit held that the DEA agents did not have a reasonable suspicion to stop respondent, as required by the Fourth Amendment. We take the contrary view.
**Facts**
 This case involves a typical attempt to smuggle drugs through one of the Nation's airports. On a Sunday in July 1984, respondent went to the United Airlines ticket counter at Honolulu Airport, where he purchased two round-trip tickets for a flight to Miami leaving later that day. The tickets were purchased in the names of "Andrew Kray" and "Janet Norian" and had open return dates. Respondent paid $ 2,100 for the tickets from a large roll of $ 20 bills, which appeared to contain a total of $ 4,000. He also gave the ticket agent his home telephone number. The ticket agent noticed that respondent seemed nervous; he was about 25 years old; he was dressed in a black jumpsuit and wore gold jewelry; and he was accompanied by a woman, who turned out to be Janet Norian. Neither respondent nor his companion checked any of their four pieces of luggage.
After the couple left for their flight, the ticket agent informed Officer John McCarthy of the Honolulu Police Department of respondent's cash purchase of tickets to Miami. Officer McCarthy determined that the telephone number respondent gave to the ticket agent was subscribed to a "Karl Herman," who resided at 348-A Royal Hawaiian Avenue in Honolulu. Unbeknownst to McCarthy (and later to the DEA agents), respondent was Herman's roommate. The ticket agent identified respondent's voice on the answering machine at Herman's number. Officer McCarthy was unable to find any listing under the name "Andrew Kray" in Hawaii. McCarthy subsequently learned that return reservations from Miami to Honolulu had been made in the names of Kray and Norian, with their arrival scheduled for July 25, three days after respondent and his companion had left. He also learned that Kray and Norian were scheduled to make stopovers in Denver and Los Angeles.
 On July 25, during the stopover in Los Angeles, DEA agents identified respondent. He "appeared to be very nervous and was looking all around the waiting area." Later that day, at 6:30 p.m., respondent and Norian arrived in Honolulu. As before, they had not checked their luggage. Respondent was still wearing a black jumpsuit and gold jewelry. The couple proceeded directly to the street and tried to hail a cab, where Agent Richard Kempshall and three other DEA agents approached them. Kempshall displayed his credentials, grabbed respondent by the arm, and moved him back onto the sidewalk. Kempshall asked respondent for his airline ticket and identification; respondent  said that he had neither. He told the agents that his name was "Sokolow," but that he was traveling under his mother's maiden name, "Kray."
 Respondent and Norian were escorted to the DEA office at the airport. There, the couple's luggage was examined by "Donker," a narcotics detector dog, which alerted on respondent's brown shoulder bag. The agents arrested respondent. He was advised of his constitutional rights and declined to make any statements. The agents obtained a warrant to search the shoulder bag. They found no illicit drugs, but the bag did contain several suspicious documents indicating respondent's involvement in drug trafficking. The agents had Donker reexamine the remaining luggage, and this time the dog alerted on a medium-sized Louis Vuitton bag. By now, it was 9:30 p.m., too late for the agents to obtain a second warrant. They allowed respondent to leave for the night, but kept his luggage. The next morning, after a second dog confirmed Donker's alert, the agents obtained a warrant and found 1,063 grams of cocaine inside the bag.
 Respondent was indicted for possession with the intent to distribute cocaine. …The United States District Court for Hawaii denied his motion to suppress the cocaine and other evidence seized from his luggage, finding that the DEA agents had a reasonable suspicion that he was involved in drug trafficking when they stopped him at the airport. Respondent then entered a conditional plea of guilty to the offense charged.
 The United States Court of Appeals for the Ninth Circuit reversed respondent's conviction by a divided vote, holding that the DEA agents did not have a reasonable suspicion to justify the stop. The majority divided the facts bearing on reasonable suspicion into two categories. In the first category, the majority placed facts describing "ongoing criminal activity." In the second category, it placed facts describing "personal characteristics" of drug couriers, such as the cash payment for tickets, a short trip to a major source city for drugs, nervousness, type of attire, and unchecked luggage. The majority believed that such characteristics, "shared by drug couriers and the public at large," were only relevant if there was evidence of ongoing criminal behavior and the Government offered "[e]mpirical documentation" that the combination of facts at issue did not describe the behavior of "significant numbers of innocent persons." Applying this two-part test to the facts of this case, the majority found that there was no evidence of ongoing criminal behavior, and thus that the agents' stop was impermissible. The dissenting judge took the view that the majority's approach was "overly mechanistic" and "contrary to the case-by-case determination of reasonable articulable suspicion based on all the facts."
 **Reasoning**

Our decision…turns on whether the agents had a reasonable suspicion that respondent was engaged in wrongdoing when they encountered him on the sidewalk. In *Terry* v. *Ohio*, we held that the police can stop and briefly detain a person for investigative purposes if the officer has a reasonable suspicion supported by articulable facts that criminal activity "may be afoot," even if the officer lacks probable cause.
  The officer, of course, must be able to articulate something more than an "inchoate and unparticularized suspicion or 'hunch.'" The Fourth Amendment requires "some minimal level of objective justification" for making the stop. That level of suspicion is considerably less than proof of wrongdoing by a preponderance of the evidence. We have held that probable cause means "a fair probability that contraband or evidence of a crime will be found," and the level of suspicion required for a *Terry* stop is obviously less demanding than that for probable cause.
  The concept of reasonable suspicion, like probable cause, is not "readily, or even usefully, reduced to a neat set of legal rules." We think the Court of Appeals' effort to refine and elaborate the requirements of "reasonable suspicion" in this case creates unnecessary difficulty in dealing with one of the relatively simple concepts embodied  in the Fourth Amendment. In evaluating the validity of a stop such as this, we must consider "the totality of the circumstances -- the whole picture." As we said in *Cortez:* "The process does not deal with hard certainties, but with probabilities.” The rule enunciated by the Court of Appeals, in which evidence available to an officer is divided into evidence of "ongoing criminal behavior,"  on the one hand, and "probabilistic" evidence, on the other, is not in keeping with the quoted statements from our decisions. It also seems to us to draw a sharp line between types of evidence, the probative value of which varies only in degree. The Court of Appeals classified evidence of traveling under an alias, or evidence that the suspect took an evasive or erratic path through an airport, as meeting the test for showing "ongoing criminal activity." But certainly instances are conceivable in which traveling under an alias would not reflect ongoing criminal activity: for example, a person who wished to travel to a hospital or clinic for an operation and wished to conceal that fact. One taking an evasive path through an airport might be seeking to avoid a confrontation with an angry acquaintance or with a creditor. This is not to say that each of these types of evidence is not highly probative, but they do not have the sort of ironclad significance attributed to them by the Court of Appeals.
 On the other hand, the factors in this case that the Court of Appeals treated as merely "probabilistic" also have probative significance. Paying $ 2,100 in cash for two airplane tickets is out of the ordinary, and it is even more out of the ordinary to pay that sum from a roll of $ 20 bills containing nearly twice that amount of cash. Most business travelers, we feel confident, purchase airline tickets by credit card or check so as to have a record for tax or business purposes, and few vacationers carry with them thousands of dollars in $ 20 bills. We also think the agents had a reasonable ground to believe that respondent was traveling under an alias; the evidence was by no means conclusive, but it was sufficient to warrant consideration. While a trip from Honolulu to Miami, standing alone, is not a cause for any sort of suspicion, here there was more: surely few residents of Honolulu travel from that city for 20 hours to spend 48 hours in Miami during the month of July.
  Any one of these factors is not by itself proof of any illegal conduct and is quite consistent with innocent travel. But we think taken together they amount to reasonable suspicion. We said in *Reid* v. *Georgia* "there could, of course, be circumstances in which wholly lawful conduct might justify the suspicion that criminal activity was afoot." We noted in discussing probable cause…that "innocent behavior will frequently provide the basis for a showing of probable cause," and that "[i]n making a determination of probable cause the relevant inquiry is not whether particular conduct is 'innocent' or 'guilty,' but the degree of suspicion that attaches to particular types of noncriminal acts." That principle applies equally well to the reasonable suspicion inquiry.
 We do not agree with respondent that our analysis is somehow changed by the agents' belief that his behavior was consistent with one of the DEA's "drug courier profiles." A court sitting to determine the existence of reasonable suspicion must require the agent to articulate the factors leading to that conclusion, but the fact that these factors may be set forth in a "profile" does not somehow detract from their evidentiary significance as seen by a trained agent.
  Respondent also contends that the agents were obligated to use the least intrusive means available to verify or dispel their suspicions that he was smuggling narcotics. In respondent's view, the agents should have simply approached and spoken with him, rather than forcibly detaining him. …The reasonableness of the officer's decision to stop a suspect does not turn on the availability of less intrusive investigatory techniques. Such a rule would unduly hamper the police's ability to make swift, on-the-spot decisions -- here, respondent was about to get into a taxicab -- and it would require courts to "indulge in 'unrealistic second-guessing.'"
  We hold that the agents had a reasonable basis to suspect that respondent was transporting illegal drugs on these facts. The judgment of the Court of Appeals is therefore reversed, and the case is remanded for further proceedings consistent with our decision.

Justice Marshall, with whom Justice Brennan joins, **dissenting**

 In the present case, the chain of events set in motion when respondent Andrew Sokolow was stopped by Drug Enforcement Administration (DEA) agents at Honolulu International Airport led to the  discovery of cocaine and, ultimately, to Sokolow's conviction for drug trafficking. But in sustaining this conviction on the ground that the agents reasonably suspected Sokolow of ongoing criminal activity, the Court diminishes the rights of all citizens "to be secure in their persons," as they traverse the Nation's airports. Finding this result constitutionally impermissible, I dissent. …By requiring reasonable suspicion as a prerequisite to such seizures, the Fourth Amendment protects innocent persons from being subjected to "overbearing or harassing" police conduct carried out solely on the basis of imprecise stereotypes of what criminals look like, or on the basis of irrelevant personal characteristics such as race.
 To deter such egregious police behavior, we have held that a suspicion is not reasonable unless officers have based it on "specific and articulable facts." Evaluated against this standard, the facts about Andrew Sokolow known to the DEA agents at the time they stopped him fall short of reasonably indicating that he was engaged at the time in criminal activity. It is highly significant that the DEA agents stopped Sokolow because he matched one of the DEA's "profiles" of a paradigmatic drug courier. In my view, a law enforcement officer's mechanistic application of a formula of personal and behavioral traits in deciding whom to detain can only dull the officer's ability and determination to make sensitive and fact-specific inferences "in light of his experience," particularly in ambiguous or borderline cases. Reflexive reliance on a profile of drug courier characteristics runs a far greater risk than does ordinary, case-by-case police work of subjecting innocent individuals to unwarranted police harassment and detention. This risk is enhanced by the profile's "chameleon-like way of adapting to any particular set of observations." Even if such profiles had reliable predictive value, their utility would be short lived, for drug couriers will adapt their behavior to sidestep detection from profile-focused officers.
 That the factors comprising the drug courier profile relied on in this case are especially dubious indices of ongoing criminal activity is underscored by *Reid* v. *Georgia*, a strikingly similar case. There, four facts, encoded in a drug courier profile, were alleged in support of the DEA's detention of a suspect at the Atlanta Airport. First, Reid had arrived from Fort Lauderdale, Florida, a source city for cocaine. Second, he arrived in the early morning, when law enforcement activity is diminished. Third, he and his companion appeared to have no luggage other than their shoulder bags. And fourth, he and his companion appeared to be trying to conceal the fact that they were traveling together.
 This collection of facts, we held, was inadequate to support a finding of reasonable suspicion. All but the last of these facts, we observed, "describe a very large category of presumably innocent travelers, who would be subject to virtually random seizures were the Court to conclude that as little foundation as there was in this case could justify a seizure." The sole fact that suggested criminal activity was that Reid "preceded another person and occasionally looked backward at him as they proceeded through the concourse." This observation did not of itself provide a reasonable basis for suspecting wrongdoing, for inferring criminal activity from such evidence reflected no more than an "inchoate and unparticularized suspicion or hunch."...
 The facts known to the DEA agents at the time they detained the traveler in this case are scarcely more suggestive of ongoing criminal activity than those in *Reid*. Unlike traveler Reid, who sought to conceal the fact that he was traveling with a companion, and who even attempted to run away after being approached by a DEA agent, traveler Sokolow gave no indications of evasive activity. On the contrary, the sole behavioral detail about Sokolow noted by the DEA agents was that he was nervous. With news accounts proliferating of plane crashes, near collisions, and air terrorism, there are manifold and good reasons for being agitated while awaiting a flight, reasons that have nothing to do with one's involvement in a criminal endeavor.
 The remaining circumstantial facts known about Sokolow, considered either singly or together, are scarcely indicative of criminal activity. Like the information disavowed in *Reid* as nonprobative, the fact that Sokolow took a brief trip to a resort city for which he brought only carry-on luggage also "describe[s] a very large category of presumably innocent travelers." That Sokolow embarked from Miami, "a source city for illicit drugs," is no more suggestive of illegality; thousands of innocent persons travel from "source cities" every day and, judging from the DEA's testimony in past cases, nearly every major city in the country may be characterized as a source or distribution city. That Sokolow had his phone listed in another person's name also does not support the majority's assertion that the DEA agents reasonably believed Sokolow was using an alias; it is commonplace to have one's phone registered in the name of a roommate, which, it later turned out, was precisely what Sokolow had done. That Sokolow was dressed in a black jumpsuit and wore gold jewelry also provides no grounds for suspecting wrongdoing, the majority's repeated and unexplained allusions to Sokolow's style of dress notwithstanding. For law enforcement officers to base a search, even in part, on a "pop" guess that persons dressed in a particular fashion are likely to commit crimes not only stretches the concept of reasonable suspicion beyond recognition, but also is inimical to the self-expression which the choice of wardrobe may provide. That Sokolow was, in fact, using an alias was not known to the DEA agents until after they detained him. Thus, it cannot legitimately be considered as a basis for the seizure in this case.
 Finally, that Sokolow paid for his tickets in cash indicates no imminent or ongoing criminal activity. The majority "feel[s] confident" that "[m]ost business travelers . . . purchase airline tickets by credit card or check." Why the majority confines its focus only to "business travelers" I do not know, but I would not so lightly infer ongoing crime from the use of legal tender. Making major cash purchases, while surely less common today, may simply reflect the traveler's aversion to, or inability to obtain, plastic  money. Conceivably, a person who spends large amounts of cash may be trying to launder his proceeds from past criminal enterprises by converting them into goods and services. But, as I have noted, investigating completed episodes of crime goes beyond the appropriately limited purview of the brief, *Terry*-style seizure. Moreover, it is unreasonable to suggest that, had Sokolow left the airport, he would have been gone forever and thus immune from subsequent investigation. Sokolow, after all, had given the airline his phone number, and the DEA, having ascertained that it was indeed Sokolow's voice on the    answering machine at that number, could have learned from that information where Sokolow resided.
 The fact is that, unlike the taking of patently evasive action…the casing of a store, or the provision of a reliable report from an informant that wrongdoing is imminent, nothing about the characteristics shown by airport traveler Sokolow reasonably suggests that criminal activity is afoot. The majority's hasty conclusion to the contrary serves only to indicate its willingness, when drug crimes or antidrug policies are at issue, to give short shrift to constitutional rights. In requiring that seizures be based on at least some evidence of criminal conduct, the Court of Appeals was faithful to the Fourth Amendment principle that law enforcement officers  must reasonably suspect a person of criminal activity before they can detain him. Because today's decision, though limited to its facts, disobeys this important constitutional command, I dissent.

**Questions for Discussion**

1. What is the holding of the Supreme Court in *Sokolow.* Is the court’s decision consistent with the judgments in *Reid* and in *Royer*?
2. Compare the opinion of the majority with the analysis of the dissenting judges.

3. Do you believe that the determination of the court majority that the DEA agents possessed reasonable suspicion was influenced by the fact that Sokolow was stopped based on a drug courier profile. As a judge, would you find it persuasive that law enforcement officers relied on a drug courier profile.

4. **Problems in policing**. Develop a profile of a street corner drug dealer that a judge would accept as constituting reasonable suspicion..

# WAS WEAVER SEIZED BECAUSE HE IS AN AFRICAN-AMERICANS

*U.S. v. WEAVER*

966 F.2d 391 (8th Cir. 1992)

Wollman, J.

 Arthur T. Weaver appeals his conviction on a charge of possession of cocaine with intent to distribute. The sole issue before us on appeal is whether the district court n1 erred in denying Weaver's motion to suppress evidence.
**Facts**
In the early morning hours of March 8, 1989, Drug Enforcement Administration (DEA) agent Carl Hicks and Platte County Detectives Paul Carrill and Tully Kessler were at the Kansas City International Airport awaiting the arrival of Braniff Flight 650, a direct flight to Kansas City from Los Angeles due in at 6:45 a.m. As Weaver disembarked from Flight 650 he caught Officer Hick's attention because he was a "roughly dressed" young black male who was carrying two bags and walking rapidly, almost running, down the concourse toward a door leading to a taxi stand. Because Hicks was aware that a number of young roughly dressed black males from street gangs in Los Angeles frequently brought cocaine into the Kansas City area and that walking quickly towards a taxicab was a common characteristic of narcotics  couriers at the airport, he became suspicious that Weaver was a drug trafficker.
 Hicks and his fellow officers began running down the concourse after Weaver. Weaver stopped, turned around, saw the three men approaching him, and hesitated. Hicks displayed his badge and asked Weaver if he would answer some questions. In response to Hicks' question, Weaver said that he had been in  Los Angeles trying to find his sister who had been missing for several years. Hicks requested to see Weaver's airline ticket, but after searching his pockets Weaver said that he must have left it on the plane. When Hicks asked Weaver if he had any identification, Weaver replied that he did not, but gave Hicks his name and Kansas City address. Hicks testified that while it is extremely uncommon for adults not to have identification, it is common for persons carrying narcotics not to have any. Hicks also testified that Weaver appeared to be very nervous: his voice was unsteady, his speech was rapid, his hands shook, and his body swayed. Officer Carrill testified that although people often become nervous when approached by a police officer, Weaver exhibited more nervousness than innocent people usually do.
 Hicks again displayed his badge, identified himself as a DEA agent looking for drugs, and asked to search Weaver's bags. After telling Hicks that he did not have any drugs, Weaver initially assented to Hicks' searching his bags, but then changed his mind and told Hicks that he could not search the bags without a warrant. Weaver then said that he needed to catch a taxi to see his mother in the hospital, picked up his bags, and walked out of the terminal towards a taxicab.
 Hicks decided at this point to detain Weaver's bags and apply for a search warrant. He and the other officers followed Weaver to the sidewalk outside the terminal, where Hicks told Weaver that he was going to detain his bags and attempt to get a search warrant. Weaver stopped, set down the bags, opened one of them and removed a sweater, saying, "Look, there's no drugs in my bag," but would not let Hicks look in the bag. Weaver again picked up the bags and walked toward a taxi.
 Hicks followed Weaver and again told him that he was going to seize his bags and attempt to get a search warrant. Hicks told Weaver that he was free to remove anything he needed in order to continue his trip. Weaver said he needed a coat out of the bag. Hicks told him that that was fine and that he would give Weaver a receipt for the bag. Nevertheless, Weaver got into the back seat of a taxi with both bags. Hicks grabbed one of the bags and tried to take it out of the taxi. When Weaver began hitting Hicks' hand in an attempt to pry it off his bag, Hicks placed him under arrest.
 The officers then conducted a pat down search on Weaver. They found a plastic bag filled with crack cocaine and a smoking pipe, along with $ 2,532 in currency. Hicks obtained a warrant and searched both of Weaver's bags. One of the bags contained more than six pounds of crack cocaine.
 Weaver moved to suppress all physical evidence obtained from his person and baggage. Following a hearing, the district court denied the motion. Weaver entered a conditional guilty plea, reserving the right to appeal the denial of the suppression motion. The district court sentenced Weaver to 151 months' imprisonment, supervised release of five years, a fine of ten thousand dollars, and a special assessment. This appeal followed.
**Issue**
Weaver contends that the law enforcement officers did not have a reasonable, articulable suspicion of criminal activity and thus violated his Fourth Amendment right to be free from unreasonable searches and seizures.
 Because Weaver felt free to leave when the officers first questioned him, that encounter was consensual and did not constitute a seizure. It was only when Hicks told Weaver that he intended to seize Weaver's bags that a seizure for Fourth Amendment purposes occurred. Our decision therefore turns on whether the officers had a reasonable, articulable suspicion that Weaver was engaged in criminal activity when they pursued him to detain his baggage after he attempted to leave.
 Hicks testified that he took the following factors into consideration when he decided to detain Weaver's bags: (1) that Weaver got off a direct flight from Los Angeles, a source city for drugs; (2) that he was a roughly dressed young black male who might be a member of a Los Angeles street gang that had been bringing narcotics into the Kansas City area; (3) that he moved rapidly from the airplane toward a taxicab; (4) that he had two carry-on bags and no checked luggage; (5) that he had no identification on his person; (6) that he did not have a copy of his ticket; (7) that he appeared very nervous when he talked to Hicks; (8) and that he made no mention of visiting his mother until the last second before he tried to leave the consensual interview.
 Regarding the matter of race, Hicks testified that several different factors caused him to suspect that Weaver might be carrying drugs: "Number one, we have intelligence information and also past arrest history on two black -- all black street gangs from Los Angeles called the Crips and the Bloods. They are notorious for transporting cocaine into the Kansas City area from Los Angeles for sale. Most of them are young, roughly dressed male blacks."
 We agree with the dissent that large groups of our citizens should not be regarded by law enforcement officers as presumptively criminal based upon their race. We would not hesitate to hold that a solely race-based suspicion of drug courier status would not pass constitutional muster. Accordingly, had Hicks relied solely upon the fact of Weaver's race as a basis for his suspicions, we would have a different case before us. As it is, however, facts are not to be ignored simply because they may be unpleasant--and the unpleasant fact in this case is that Hicks had knowledge, based upon his own experience and upon the intelligence reports he had received from the Los Angeles authorities, that young male members of black Los Angeles gangs were flooding the Kansas City area with cocaine. To that extent, then, race, when coupled with the other factors Hicks relied upon, was a factor in the decision to approach and ultimately detain Weaver. We wish it were otherwise, but we take the facts as they are presented to us, not as we would like them to be.
 We conclude that the facts known to Agent Hicks in the present case gave him reasonable, articulable suspicion that Weaver was carrying drugs. Without recounting all of the facts set forth earlier in this opinion, we note that Weaver's rapid mode of walking towards the taxi stand was characteristic of deplaning drug couriers. Weaver lacked a copy of his plane ticket. His lack of identification, uncommon in the case of most adults, was known to Hicks to be common for drug couriers. Weaver's nervousness, as manifested by his unsteady, rapid speech, his tremulous hands, and his swaying body, struck the officers as exceeding that exhibited by nondrug-carrying passengers.
 It is true that some or all of the facts relied upon by Agent Hicks could, and might when viewed by those having no experience in surveiling and apprehending drug couriers, be viewed as innocent, nonsuspicion-raising details. Indeed, when juxtaposed against each other, the facts in similar cases can be made to appear wildly inconsistent and contradictory. Nevertheless, we must review these cases one at a time and on their particular facts. Having done so here, we conclude that Agent Hicks possessed a reasonable, articulable suspicion that Weaver was carrying drugs, and we therefore affirm the order denying the motion to suppress.

Arnold, C.J., **dissenting.**
One of the most disturbing aspects of this case is the agents' reference to Weaver as "a roughly dressed young black male," ante at 5. Most young people on airplanes are roughly dressed, or at least they look that way to one of my age and stage. (This could be said of older people, too, I suspect.) And large numbers of travelers carry two or even three bags on planes with them, apparently mistrusting the airlines' baggage service.
 About the only thing left is the officers' testimony that Weaver appeared to be more nervous than innocent passengers. I do not question the officers' sincerity, but it seems unwise to place much weight on such a subjective factor, one that can be wheeled out for use in almost every airport-stop case. The predicate of this assertion must be that Agent Hicks and his colleagues have questioned many passengers, some of whom are innocent, enough passengers, in fact, to be able to vouchsafe an expert opinion on the relative nervousness of drug-carrying passengers as opposed to law-abiding ones. It would be interesting to know how many innocent people have been stopped, either for questioning alone, or for search of their luggage. This information, which we never seem to get in these cases, would go far towards enabling us to say whether the kind of police tactic we have before us is reasonable, which is, after all, the controlling criterion in applying the Fourth Amendment.
 Finally, a word about the reliance placed on Weaver's race. This factor is repeated several times in the Court's opinion. I am not prepared to say that it could never be relevant. If, for example, we had evidence that young blacks in Los Angeles were more prone to drug offenses than young whites, the fact that a young person is black might be of some significance, though even then it would be dangerous to give it much weight. I do not know of any such evidence. Use of race as a factor simply reinforces the kind of stereotyping that lies behind drug-courier profiles. When public officials begin to regard large groups of citizens as presumptively criminal, this country is in a perilous situation indeed.
 Airports are on the verge of becoming war zones, where anyone is liable to be stopped, questioned, and even searched merely on the basis of the on-the-spot exercise of discretion by police officers. The liberty of the citizen, in my view, is seriously threatened by this practice. The sanctity of private property, a precious human right, is endangered. It's hard to work up much sympathy for Weaver. He's getting what he deserves, in a sense. What is missing here, though, is an awareness that law enforcement is a broad concept. It includes enforcement of the Bill of Rights, as well as enforcement of criminal statutes. Cases in which innocent travelers are stopped and impeded in their lawful activities don't come to court. They go on their way, too busy to bring a lawsuit against the officious agents who have detained them. If the Fourth Amendment is to be enforced, therefore, it must be by way of motions to suppress in cases like this. What we get, instead, as the Court acknowledges, is case after case upholding searches and seizures on "facts [that] . . . can be made to appear wildly inconsistent and contradictory." Of course we must review each case one at a time and on its particular facts, but we do so against a pattern of precedent. Here, White seems to me controlling.

**Questions for Discussion**

1. What were the factors that DEA Agent Hicks rely on to stop Weaver.

2. Do you agree with Judge Arnold in his dissenting opinion that the defendant’s race should not have been considered by Hicks in determining whether he had reasonable suspicion to stop Weaver.

3. When does the dissent suggest that race may be relevant.

# WAS UBER STOPPED BECAUSE HE IS A CAUCASIAN?

*CITY OF ST. PAUL V. UBER,*

450 N.W.2d 623 (Minn.App. 1990)

Randall, J.

 Appellant Stephen D. Uber was arrested on January 31, 1989, at 2:52 a.m. near the intersection of Mackubin Street and University Avenue in St. Paul. Appellant was charged with driving after revocation and driving with an expired license. He filed a pretrial motion contesting the validity of the stop that led to his arrest. The trial court upheld the validity of the stop and found appellant guilty of the charges. Because we conclude the stop of appellant's vehicle violated the  fourth amendment, we reverse.

**Facts**
 Appellant's pickup truck was stopped by Officer David Mathison on January 31, 1989. Following the stop, Mathison ascertained that appellant's driver's license was revoked and expired. At the time, Mathison had been employed as a police officer for approximately 18 months and was assisting the vice unit of the St. Paul Police Department. He first observed appellant at approximately 2:15 a.m. on January 31st when appellant was driving near the intersection of Kent Street and Charles Avenue in St. Paul. At that time, Mathison was working on another stop. Mathison next saw appellant at approximately 2:45 a.m. when he observed appellant's vehicle make a left turn from University and proceed northbound on Mackubin. Mathison testified that he knew it was the same truck because he recognized the driver. Mathison radioed in the license plate numbers and learned that the vehicle was registered to a person in Moundsview, Minnesota, a metro suburb located approximately 20 miles northwest of St. Paul. Upon learning that the vehicle was registered to someone in Moundsview, Mathison decided to stop appellant's pickup.
 On cross-examination, Mathison conceded that   he did not observe appellant exhibit any erratic driving behavior or engage in any illegal activity. Mathison also admitted that he did not have any outside information that appellant was suspected of involvement in any criminal activity. The officer testified that appellant was traveling around the posted speed at all times. Mathison did not observe appellant circle the block, make a stop, or pick up anyone. Appellant did not slow down, stop his vehicle, or engage in conversation with anyone who might be a prostitute. Also, at the time appellant's vehicle was stopped, there is no evidence that any known or suspected prostitutes were near the vehicle. Nevertheless, upon ascertaining that appellant's vehicle was registered to a Moundsview address, the officer made a decision to stop the vehicle because he thought appellant was engaging in suspicious criminal activity relative to prostitution.
 Mathison testified that the Summit-University area is well-known as an area in which prostitution flourishes. Therefore, Mathison stated: “Vehicles that do not normally belong in the area are stopped, driving privileges are checked, and we inquire as to why they are in the area.“ Officer Mathison   testified that certain characteristics are typical of persons looking for prostitutes. These include: “One person in a [vehicle], the time of day, how often a vehicle is seen in the area, if it stops frequently, and if it picks up anybody. “

The trial court upheld the validity of the stop, accepting Mathison's description of   appellant as fitting within the profile of a person looking for prostitutes. The trial court found that appellant was traveling alone, had been seen in the area twice within a 30-minute period, and was in the area at a late hour, 2:52 a.m. The trial court found that these characteristics, along with appellant's out-of-the-area address, provided adequate justification for the stop of appellant's vehicle.
 The case was tried to the court with the prosecution and defense counsel agreeing to stipulated facts. The parties agreed that appellant's driver's license was revoked and expired at the time of the stop, but that the arresting officer did not know that prior to the stop, and thus the conviction purely lies or falls on whether the stop was permissible. If appellant's pretrial motion to suppress the evidence because of an impermissible stop should have been granted,  the conviction must be vacated and the case against appellant dismissed. If the stop was permissible because the officer had articulable and particularized suspicion of criminal activity, appellant's conviction for a driver's license violation stands.

**Issue**
 Did the trial court err by concluding that the stop of appellant's vehicle was valid?

**Reasoning**
 Application of constitutional law to the existing facts mandates a reversal in favor of appellant. The constitutionality of the stop in this case depends entirely on the testimony of Officer Mathison. Appellant's testimony was that he was driving in the area to pick up his roommate from a friend's house. He testified that he was not familiar with the area, knew that the friend lived on Sherburne Avenue, but was not sure of the exact address. He testified that he was cruising in the general area and he was stopped while looking for his roommate's car.
 We do not rest our decision on appellant's version of the facts, as that would be a credibility and believability issue for the trial court. For purposes of this analysis, we will disregard appellant's explanation, as if he had never testified, and assume that every observable fact testified  to by the officer is true. Even with that assumption, we find the objective facts articulated by the officer to be de minimis, and beneath constitutional standards.
 The record is not clear what specific criminal activity appellant was suspected of as he drove his vehicle. The record does not disclose whether the officer claimed he observed objective and particularized facts that led to a belief appellant was a pimp, or facts that led to a belief that appellant was illegally propositioning a prostitute for sexual favors in return for compensation. If the officer concluded that appellant, while driving down a public street, and although not stopping to talk to a prostitute or even slowing down to approach one, was "thinking in his own mind" that he might stop and proposition a prostitute if he saw one, then the stop was based purely on the officer speculating that appellant was thinking of a crime, and therefore was improper as auto stops must be based on particularized and objective observable facts. It is not criminal activity to be driving properly down a public street and muse or turn over in your own mind the possibility that if you saw a prostitute you might stop.
 The next observable fact is that appellant was seen twice, but only twice, in the same general area within a 30-minute time span. The arresting officer conceded that appellant was not seen circling the same block, was not observed stopping or slowing down in the vicinity of any known prostitutes, did not attempt to engage anyone in conversation, and, as stated above, testified that no erratic driving behavior of any kind nor any evasive activity was observed.
 Thus, the heart of our analysis rests, as the officer so testified, upon the fact that appellant's vehicle was registered o a person in Moundsview, a metropolitan suburb of the Twin Cities. It is significant that the officer did nothing based on appellant's driving conduct. It is not until he ran a radio check of appellant's license  plate and found out that the vehicle was registered to a person in Moundsview that he acted. In the officer's mind that completed the "profile" of a male adult from out of the Summit-University area coming there to look for a prostitute.
 Even this observable fact is weak. There can be considerable lag time between the date a vehicle is sold or otherwise transferred and the new owner re-registers the vehicle at his or her address. There is also lag time when the owner of a vehicle changes address and does not immediately inform the state driver's license department. All the registration on January 31, 1989, proves is that on that date the truck was *registered* to a person in Moundsview. It does not, by itself, prove that the owner actually lived in Moundsview on that date.
 We know of no authority that requires a resident of the State of Minnesota to have any reason to be on the public streets of another town as long as that person does not breach the peace or in any other way engage in improper behavior. No one from any suburb needs to justify his or her lawful presence on a public street in Minneapolis or St. Paul, or for that matter, on the public street of any other town. There simply needs to be something more than driving your own car in a proper and legitimate manner on the public streets of a town "other than the one you live in" before the authorities can stop citizens. What we do find is the officer's assumption that appellant was seeking prostitution, upon learning that appellant's vehicle was licensed to a resident of Moundsview, to be an inadvertent, but nevertheless invidious, form of discrimination.
 We would not tolerate the blatant discriminatory proposition that any member of a minority group found on a public street in Edina after midnight had better live there, or be required to stop and justify his or her presence to the authorities. Yet, we have a similar proposition here. Moundsview is a predominately white suburb, as are all of the suburbs ringing Minneapolis and St. Paul. The Summit-University area is a mixed neighborhood containing Caucasians and people of color. Once we clear away the smoke from this case, it is clear that the stop of appellant, which only took place after his probable residence was ascertained, is premised on the belief that after midnight, Caucasian males from the suburbs are only in the Summit-University area for no good, and that after midnight, no good is all the Summit-University area has to offer. Neither the residents of Moundsview nor the residents of Summit-University deserve the implications of this case. It may be true that Summit-University has a higher incidence of prostitution than Moundsview, but simply being on a public street in an area where one "might" find a prostitute or a drug dealer does not, without more, meet any constitutional standard for a stop by the authorities.

The proposition that a white person in a black area becomes, without more, suspect to the authorities has the reverse but still disturbing resemblance to the chilling reasoning behind a 1930's ordinance in Palm Beach, Florida, a private enclave on the east coast whose name is synonymous with wealth. Palm Beach required domestics and service people working in the town to carry identity cards, be photographed, and fingerprinted.
  In 1985 the practice came to light and was brought to national attention by a satirical cartoon in Gary Trudeau's syndicated strip "Doonesbury." A federal district court struck down the ordinance and the Florida state legislature outlawed the practice, claiming it was reminiscent of South African Apartheid rules. A Florida state representative said of the ordinance, "It violates the right to privacy, the right to work, and the right to travel freely." The perplexed Palm Beach police, in defending the ordinance, explained that it had much use when comparing the fingerprints on file to exclude suspects of burglaries, and also was used to locate missing people and find wanted criminals. It is interesting that the regulation applied only to domestics and workers coming into Palm Beach to work, but not residents. Evidently residents of Palm Beach themselves were never missing or suspected of anything.
  **Holding**
 An objective analysis of the facts and the arresting officer's honest testimony and answers to questions on cross-examination leads only to the inescapable conclusion at which we arrive. Like the United States Supreme Court in Reid v. Georgia we cannot sustain what was, in effect, a random stop. On these facts, we decline to lower the present threshold justifying police stops of private citizens. The stop of appellant's vehicle was not based upon reasonable articulable suspicion of criminal activity; thus the evidence obtained from the stop must be suppressed; and appellant's conviction for driving with an expired and revoked license must be vacated.
**Questions for Discussion**
1. What factors led Officer Mathison to conclude that Uber intended to solicit a prostitute. Does the court consider that these factor constitute reasonable suspicion.
2. Was the fact that Uber was a Caucasian an important aspect of the Officer Mathison’s decision to stop Uber.
3. Do you consider Officer Mathison’s stop of Uber to be unreasonable.

# WAS SHARPE DETAINED FOR AN UNREASONABLE AMOUNT OF TIME?

*UNITED STATES V. SHARPE*

470 U.S. 675 (1985)

Burger, J.

**Issue**

We granted certiorari to decide whether an individual reasonably suspected of engaging in criminal activity may be detained for a period of 20 minutes, when the detention is necessary for law enforcement officers to conduct a limited investigation of the suspected criminal activity.
**Facts**

On the morning of June 9, 1978, Agent Cooke of the Drug Enforcement Administration (DEA) was on patrol in an unmarked vehicle on a coastal road near Sunset Beach, North Carolina, an area under surveillance for suspected drug trafficking. At approximately 6:30 a. m., Cooke noticed a blue pickup truck with an attached camper shell traveling on the highway in tandem with a blue Pontiac Bonneville. Respondent Savage was driving the pickup, and respondent Sharpe was driving the Pontiac. The Pontiac also carried a passenger, Davis, the charges against whom were later dropped. Observing that the truck was riding low in the rear and that  the camper  did not bounce or sway appreciably when the truck drove over bumps or around curves, Agent Cooke concluded that it was heavily loaded. A quilted material covered the rear and side windows of the camper.
 Cooke's suspicions were sufficiently aroused to follow the two vehicles for approximately 20 miles as they proceeded south into South Carolina. He then decided to make an "investigative stop" and radioed the State Highway Patrol for assistance. Officer Thrasher, driving a marked patrol car, responded to the call. Almost immediately after Thrasher caught up with the procession, the Pontiac and the pickup turned off the highway and onto a campground road. n1 Cooke and Thrasher followed the two vehicles as the latter drove along the road at 55 to 60 miles an hour, exceeding the speed limit of 35 miles an hour. The road eventually looped back to the highway, onto which Savage and Sharpe turned and continued to drive south.
 At this point, all four vehicles were in the middle lane of the three right-hand lanes of the highway. Agent Cooke asked Officer Thrasher to signal both vehicles to stop. Thrasher pulled alongside the Pontiac, which was in the lead, turned on his flashing light, and motioned for the driver of the Pontiac to stop. As Sharpe moved the Pontiac into the right lane, the pickup truck cut between the Pontiac and Thrasher's patrol car, nearly hitting the patrol car, and continued down the highway. Thrasher pursued the truck while Cooke pulled up behind the Pontiac.
 Cooke approached the Pontiac and identified himself. He requested identification, and Sharpe produced a Georgia driver's license bearing the name of Raymond J. Pavlovich. Cooke then attempted to radio Thrasher to determine whether he had been successful in stopping the pickup truck, but he was unable to make contact for several minutes, apparently because Thrasher was not in his patrol car. Cooke radioed the local police for assistance, and two officers from the Myrtle Beach Police Department arrived about 10 minutes later. Asking the two officers to "maintain the situation," Cooke left to join Thrasher.
 In the meantime, Thrasher had stopped the pickup truck about one-half mile down the road. After stopping the truck, Thrasher had approached it with his revolver drawn, ordered the driver, Savage, to get out and assume a "spread eagled" position against the side of the truck, and patted him down. Thrasher then holstered his gun and asked Savage for his driver's license and the truck's vehicle registration. Savage produced his own Florida driver's license and a bill of sale for the truck bearing the name of Pavlovich. In response to questions from Thrasher concerning the ownership of the truck, Savage said that the truck belonged to a friend and that he was taking it to have its shock absorbers repaired. When Thrasher told Savage that he would be held  [*679]  until the arrival of Cooke, whom Thrasher identified as a DEA agent, Savage became nervous, said that he   wanted to leave, and requested the return of his driver's license. Thrasher replied that Savage was not free to leave at that time.
 Agent Cooke arrived at the scene approximately 15 minutes after the truck had been stopped. Thrasher handed Cooke Savage's license and the bill of sale for the truck; Cooke noted that the bill of sale bore the same name as Sharpe's license. Cooke identified himself to Savage as a DEA agent and said that he thought the truck was loaded with marihuana. Cooke twice sought permission to search the camper, but Savage declined to give it, explaining that he was not the owner of the truck. Cooke then stepped on the rear of the truck and, observing that it did not sink any lower, confirmed his suspicion that it was probably overloaded. He put his nose against the rear window, which was covered from the inside, and reported that he could smell marihuana. Without seeking Savage's permission, Cooke removed the keys from the ignition, opened the rear of the camper, and observed a large number of burlap-wrapped bales resembling bales of marihuana that Cooke had seen in previous investigations. Agent Cooke then placed Savage under arrest and left him with Thrasher.
 Cooke returned to the Pontiac and arrested Sharpe and Davis. Approximately 30 to 40 minutes had elapsed between the time Cooke stopped the Pontiac and the time he returned to arrest Sharpe and Davis. Cooke assembled the various parties and vehicles and led them to the Myrtle Beach police station. That evening, DEA agents took the truck to the Federal Building in Charleston, South Carolina. Several days later, Cooke supervised the unloading of the truck, which contained 43 bales weighing a total of 2,629 pounds. Acting without a search warrant, Cooke had eight randomly selected bales opened and sampled. Chemical tests showed that the samples were marihuana.
 Sharpe and Savage were charged with possession of a controlled substance with intent to distribute it….[t]he United States District Court for the District of South Carolina denied respondents' motion to suppress the contraband, and respondents were convicted.
 A divided panel of the Court of Appeals for the Fourth Circuit reversed the convictions. The majority assumed that Cooke "had an articulable and reasonable suspicion that Sharpe and Savage were engaged in marijuana trafficking when he and Thrasher stopped the Pontiac and the truck." But the court held the investigative stops unlawful because they "failed to meet the requirement of brevity" thought to govern detentions on less than probable cause. Basing its decision solely on the duration of the respondents' detentions, the majority concluded that "the length of the detentions effectively transformed them into de facto arrests without bases in probable cause, unreasonable seizures under the Fourth Amendment." The majority then determined that the samples of marihuana should have been suppressed as the fruit of respondents' unlawful seizures.

**Rea****soning**

The Court of Appeals assumed that the police had an articulable and reasonable suspicion that Sharpe and Savage were engaged in marihuana trafficking, given the setting and all the circumstances when the police attempted to stop the Pontiac and the pickup. That assumption is abundantly supported by the record. As to the second part of the inquiry, however,  the court concluded that the 30- to 40-minute detention of Sharpe and the 20-minute detention of Savage "fails to meet the [Fourth Amendment's] requirement of brevity."
 Obviously, if an investigative stop continues indefinitely, at some point it can no longer be justified as an investigative stop. But our cases impose no rigid time limitation on *Terry* stops. While it is clear that "the brevity of the invasion of the individual's Fourth Amendment interests is an important factor in determining whether the seizure is so minimally intrusive as to be justifiable on reasonable suspicion," we have emphasized the need to consider the law enforcement purposes to be served by the stop as well as the time reasonably needed to effectuate those purposes. Much as a “bright line” rule would be desirable, in evaluating whether an investigative detention is unreasonable, common sense and ordinary human experience must govern over rigid criteria.
 In assessing whether a detention is too long in duration to be justified as an investigative stop, we consider it appropriate to examine whether the police diligently pursued a means of investigation that was likely to confirm or dispel their suspicions quickly, during which time it was necessary to detain the defendant. A court making this assessment should take care to consider whether the police are acting in a swiftly developing situation, and in such cases the court should not indulge in unrealistic second-guessing. A creative judge engaged in *post hoc* evaluation of police conduct can almost always imagine some alternative means by which the objectives of the police might have been accomplished. But "[the] fact that the protection of the public might, in the abstract, have been accomplished by 'less intrusive' means does not, by itself, render the search unreasonable." The question is not simply whether some other alternative was available, but whether the police acted unreasonably in failing to recognize or to pursue it.
 We readily conclude that, given the circumstances facing him, Agent Cooke pursued his investigation in a diligent and reasonable manner. During most of Savage's 20-minute detention, Cooke was attempting to contact Thrasher and enlisting the help of the local police who remained with Sharpe while Cooke left to pursue Officer Thrasher and the pickup. Once Cooke reached Officer Thrasher and Savage,he proceeded expeditiously: within the space of a few minutes, he examined Savage's driver's license and the truck's bill of sale, requested (and was denied) permission to search the truck, stepped on the rear bumper and noted that the truck did not move, confirming his suspicion that it was probably overloaded. He then detected the odor of marihuana.
 Clearly this case does not involve any delay unnecessary to the legitimate investigation of the law enforcement officers. Respondents presented no evidence that the officers were dilatory in their investigation. The delay in this case was  attributable almost entirely to the evasive actions of Savage, who sought to elude the police as Sharpe moved his Pontiac to the side of the road. n6 Except for Savage's maneuvers,  only a short and certainly permissible pre-arrest detention would likely have taken place. The somewhat longer detention was simply the result of a "[graduated] . . . [response] to the demands of [the] particular situation."
 We reject the contention that a 20-minute stop is unreasonable when the police have acted diligently and a suspect's actions contribute to the added delay about which he complains. ….

Justice Brennan, **dissenting.**

 *Terry*'s brevity requirement…functions as an important constitutional safeguard that prevents an investigative stop from being transformed into a custodial detention merely because "the law enforcement purposes to be served by the stop" are considered important. *Ante*, at 685. Absent a rigorously enforced brevity requirement, the *Terry* rationale "would threaten to swallow the general rule that Fourth Amendment seizures are 'reasonable' only if based on probable cause"... [T]he brevity requirement also serves to compel law enforcement agencies to "structure their *Terry* encounters" by employing the resources and methods necessary to "minimize the intrusions worked by these encounters." Similarly, *Royer*'s requirement that the prosecution demonstrate that the *Terry* stop was carried out in the most "expeditious way" using all "reasonably available" investigative methods, operates to ensure that law enforcement agencies commit the manpower, training, and resources necessary to guarantee that investigative detentions are carried out in the least intrusive manner possible. Some may protest that such requirements impede unduly on law enforcement, but surely these are reasonable tradeoffs for the authority to seize and detain citizens on less than probable cause. And while it may be tempting to relax these requirements when a defendant is  believed to be guilty, the standards we prescribe for the guilty define the authority of the police in detaining the innocent as well.

In this connection, I am particularly disturbed by the Court's suggestion that it might be constitutionally reasonable for a highway patrolman to hold a motorist on *Terry* suspicion pending the arrival of an  officer with more "training and experience." The Court is of course correct in emphasizing that Cooke was much more expert at drug detection than Thrasher. I can imagine a great many roadside stop situations in which it might make good police sense for the detaining officer to hold the motorist indefinitely without probable cause so that the officer could have an expert interrogator drive out from the city to conduct the "brief" questioning authorized by *Terry*, or so that his more experienced sergeant could be summoned to render a second opinion, or so that a trained narcotics dog owned by the adjacent county could be driven out to sniff around the windows. I can also imagine circumstances where, given the limited number of patrol cars in a community, an officer might prefer to handcuff a person stopped for investigative questioning to a lamppost while the officer responded to an emergency call. All of these actions might be preferable from a law enforcement standpoint. The Framers did not enact the Fourth Amendment to further the investigative powers of the authorities, however, but to curtail them: *Terry*'s exception to the probable-cause safeguard must not be expanded to the point where the constitutionality of a citizen's detention turns only on whether the individual officers were coping as best they could given inadequate training, marginal resources, negligent supervision, or botched communications.  Our precedents require more -- the demonstration by the Government that it was infeasible to conduct the training, ensure the smooth communications, and commit the sort of resources that would have minimized the intrusions.
 The Court today has evaded these requirements, failed even to acknowledge the evidence of bungling, miscommunication, and reasonable investigative alternatives, and pronounced simply that the individual officers "acted diligently." Thus the Court has moved a step or two further in what appears to be "an emerging tendency on the part of the Court to convert the *Terry* decision into a general statement that the Fourth Amendment requires only that any seizure be reasonable,"-- a balancing process in which the judicial thumb apparently will be planted firmly on the law enforcement side of the scales.
 Justice Douglas, the lone dissenter in *Terry*, warned that "[there] have been powerful hydraulic pressures throughout our history that bear heavily on the Court to water down constitutional guarantees and give the police the upper hand." 392 U.S., at 39.  [***638]  Those hydraulic pressures are readily apparent in the outcome of this case. The Court has eschewed narrow grounds of decision so as to expand the bounds of *Terry*; engaged in questionable *de* *novo* factfinding in violation of its proper mission; either ignored or misconstrued numerous factors in the record that call into question the reasonableness of these custodial detentions; and   evaded the   requirements of squarely governing precedents. This breed of decisionmaking breaches faith with our high constitutional duty "to prevent wholesale intrusions upon the personal security of our citizenry." I dissent.
**Questions for Discussion**
1. Outline the facts and holding in *Sharpe.* 2. How did the judgment clarify the law relating to *Terry* stops.
3. Why is it legally significant whether “Agent Cooke pursued his investigation in a diligent and reasonable manner.”

4. Summarize Justice Brennan’s dissent.

# Case of *United States v. Montoya De Hernandez*

*UNITED STATES V. MONTOYA DE HERNANDEZ*

473 U.S. 531 (1985)

Rehnquist, J.

**Facts**

Respondent arrived at Los Angeles International Airport shortly after midnight, March 5, 1983, on Avianca Flight 080, a direct 10-hour flight from Bogota, Colombia. Her visa was in order so she was passed through Immigration and proceeded to the customs desk. At the customs desk she encountered Customs Inspector Talamantes, who reviewed her documents and noticed from her passport that she had made at least eight recent trips to either Miami or Los Angeles. Talamantes referred respondent to a secondary customs desk for further questioning. At this desk Talamantes and another inspector asked respondent general questions concerning herself and the purpose of her trip. Respondent revealed that she spoke no English and had no family or friends in the United States. She explained in Spanish that she had come to the United States to purchase goods for her husband's store in Bogota. The customs inspectors recognized Bogota as a "source city" for narcotics. Respondent possessed $ 5,000 in cash, mostly $ 50 bills, but had no billfold. She indicated to the inspectors that she had no appointments with merchandise vendors, but planned to ride around Los Angeles in taxicabs visiting retail stores such as J. C. Penney and K-Mart in order to buy goods for her husband's store with the $ 5,000.
 Respondent admitted that she had no hotel reservations, but stated that she planned to stay at a Holiday Inn. Respondent could not recall how her airline ticket was purchased.   When the inspectors opened respondent's one small valise they found about four changes of "cold weather" clothing. Respondent had no shoes other than the high-heeled pair she was wearing. Although respondent possessed no checks, waybills, credit cards, or letters   of credit, she did produce a Colombian business card and a number of old receipts, waybills, and fabric swatches displayed in a photo album.
 At this point Talamantes and the other inspector suspected that respondent was a "balloon swallower," one who attempts to smuggle narcotics into this country hidden in her alimentary canal. Over the years Inspector Talamantes had apprehended dozens of alimentary canal smugglers arriving on Avianca Flight 080.
 The inspectors requested a female customs inspector to take respondent to a private area and conduct a patdown and strip search. During the search the female inspector felt respondent's abdomen area and noticed a firm fullness, as if respondent were wearing a girdle. The search revealed no contraband, but the inspector noticed that respondent was wearing two pairs of elastic underpants with a paper towel lining the crotch area.
 When respondent returned to the customs area and the female inspector reported her discoveries, the inspector in charge told respondent that he suspected she was smuggling drugs in her alimentary canal. Respondent agreed to the inspector's request that she be x-rayed at a hospital but in answer to the inspector's query stated that she was pregnant. She agreed to a pregnancy test before the x ray. Respondent withdrew the consent for an x ray when she learned that she would have to be handcuffed en route to the hospital. The inspector then gave respondent the option of returning to Colombia on the next available flight, agreeing to an x ray, or remaining in detention until she produced a monitored bowel movement that would confirm or rebut the inspectors' suspicions. Respondent chose the first option and was placed in a customs office under observation. She was told that if she went to the toilet she would have to use a wastebasket in the women's restroom, in order that female customs inspectors could inspect her stool for balloons or capsules carrying narcotics. The inspectors refused respondent's request to place a telephone call.
 Respondent sat in the customs office, under observation, for the remainder of the night. During the night customs officials attempted to place respondent on a Mexican airline that was flying to Bogota via Mexico City in the morning. The airline refused to transport respondent because she lacked a Mexican visa necessary to land in Mexico City. Respondent was not permitted to leave, and was informed that she would be detained until she agreed to an x ray or her bowels moved. She remained detained in the customs office under observation, for most of the time curled up in a chair leaning to one side. She refused all offers of food and drink, and refused to use the toilet facilities. The Court of Appeals noted that she exhibited symptoms of discomfort consistent with "heroic efforts to resist the usual calls of nature."
 At the shift change at 4:00 o'clock the next afternoon, almost 16 hours after her flight had landed, respondent still had not defecated or urinated or partaken of food or drink. At that time customs officials sought a court order authorizing a pregnancy test, an x ray, and a rectal examination. The Federal Magistrate issued an order just before midnight that evening, which authorized a rectal examination and involuntary x ray, provided that the physician in charge considered respondent's claim of pregnancy. Respondent was taken to a hospital and given a pregnancy test, which later turned out to be negative. Before the results of the pregnancy test were known, a physician conducted a rectal examination and removed from respondent's rectum a balloon containing a foreign substance. Respondent   was then placed   formally under arrest. By 4:10 a. m. respondent had passed 6 similar balloons; over the next four days she passed 88 balloons containing a total of 528 grams of 80% pure cocaine hydrochloride.
 After a suppression hearing the District Court admitted the cocaine in evidence against respondent. She was convicted of possession of cocaine with intent to distribute…and unlawful importation of cocaine. A divided panel of the United States Court of Appeals for the Ninth Circuit reversed respondent's convictions. The court noted that customs inspectors had a "justifiably high level of official skepticism" about respondent's good motives, but the inspectors decided to let nature take its course rather than seek an immediate magistrate's warrant for an x ray. Such a magistrate's warrant required a "clear indication" or "plain suggestion" that the traveler was an alimentary canal smuggler under previous decisions of the Court of Appeals. The court applied this required level of suspicion to respondent's case. The court questioned the "humanity" of the inspectors' decision to hold respondent until her bowels moved, knowing that she would suffer "many hours of humiliating discomfort" if she chose not to submit to the x-ray examination. The court concluded that under a "clear indication" standard "the evidence available to the customs officers when they decided to hold [respondent] for continued observation was insufficient to support the 16-hour detention."
**Issue**
 The Government contends that the customs inspectors reasonably suspected that respondent was an alimentary canal smuggler, and this suspicion was sufficient to justify the detention. In support of the judgment below respondent  argues, *inter alia*, that reasonable suspicion would not support respondent's detention, and in any event the inspectors did not reasonably suspect that respondent was carrying narcotics internally.
 **Reasoning**
  The Fourth Amendment commands that searches and seizures be reasonable. What is reasonable depends upon all of the circumstances surrounding the search or seizure and the nature of the search or seizure itself. The permissibility of a particular law enforcement practice is judged by "balancing its intrusion on the individual's Fourth Amendment interests against its promotion of legitimate governmental interests."
 Here the seizure of respondent took place at the international border. Since the founding of our Republic,   Congress has granted the Executive plenary authority to conduct routine searches and seizures at the border, without probable cause or a warrant, in order to regulate the collection of duties and to prevent the introduction of contraband into this country. This Court has long recognized Congress' power to police entrants at the border. As we stated recently: “Import restrictions and searches of persons or packages at the national border rest on different considerations and different rules of constitutional law from domestic regulations.…Historically such broad powers have been necessary to prevent smuggling and to prevent prohibited articles from entering the country.”

Consistently, therefore, with Congress' power to protect the Nation by stopping and examining persons entering this country, the Fourth Amendment's balance of reasonableness is qualitatively different at the international border than in the interior. Routine searches of the persons and effects of entrants are not subject to any requirement of reasonable suspicion, probable cause, or warrant, and first-class mail may be opened without a warrant on less than probable cause, Automotive travelers may be stopped at fixed checkpoints near the border without individualized suspicion even if the stop is based largely on ethnicity, and boats on inland waters with ready access to the sea may be hailed and boarded with no suspicion whatever.
 The cases reflect longstanding concern for the protection of the integrity of the border. This concern is, if anything, heightened by the veritable national crisis in law enforcement caused by smuggling of illicit narcotics, and in particular by the increasing utilization of alimentary canal smuggling. This desperate practice appears to be a relatively recent addition to the smugglers' repertoire of deceptive practices, and it also appears to be  exceedingly difficult to detect. Congress had recognized these difficulties. Title 19 U. S. C. provides that "all persons coming into the United States from foreign countries shall be liable to detention and search authorized . . . [by customs regulations]." Customs agents may "stop, search, and examine" any "vehicle, beast or person" upon which an officer suspects there is contraband or "merchandise which is subject to duty." § 482; see also §§ 1467, 1481; 19 CFR §§ 162.6, 162.7 (1984).

Balanced against the sovereign's interests at the border are the Fourth Amendment rights of respondent. Having presented herself at the border for admission, and having subjected herself to the criminal enforcement powers of the Federal Government, 19 U. S. C. § 482, respondent was entitled to be free from unreasonable search and seizure. But not only is the expectation of privacy less at the border than in the interior, the Fourth Amendment balance between the interests of the Government and the privacy right of the individual is also struck much more favorably to the Government at the border.
 We have not previously decided what level of suspicion would justify a seizure of an incoming traveler for purposes other than a routine border search. We hold that the detention of a traveler at the border, beyond the scope of a routine customs search and inspection, is justified at its inception if customs agents, considering all the facts surrounding the traveler and her trip, reasonably suspect that the traveler is smuggling contraband in her alimentary canal. It is also important to note what we do *not* hold. Because the issues are not presented today we suggest no view on what level of suspicion, if any, is required for nonroutine border searches such as strip, body-cavity, or involuntary x-ray searches. Both parties would have us decide the issue of whether aliens possess lesser Fourth Amendment rights at the border; that question was not raised in either court below and we do not consider it today.
 The "reasonable suspicion" standard has been applied in a number of contexts and effects a needed balance between private and public interests when law enforcement officials must make a limited intrusion on less than probable cause.  It thus fits well into the situations involving alimentary canal smuggling at the border: this type of smuggling gives no external signs and inspectors will rarely possess probable cause to arrest or search, yet governmental interests in stopping smuggling at the border are high indeed. Under this standard officials at the border must have a "particularized and objective basis for suspecting the particular person" of alimentary  [*542]  canal smuggling. The facts, and their rational inferences, known to customs inspectors  in this case clearly supported a reasonable suspicion that respondent was an alimentary canal smuggler. We need not belabor the facts, including respondent's implausible story, that supported this suspicion, The trained customs inspectors had encountered many alimentary canal smugglers and certainly had more than an "inchoate and unparticularized suspicion or 'hunch,'" that respondent was smuggling narcotics in her alimentary canal. The inspectors' suspicion was a "'common-sense [conclusion] about human behavior' upon which 'practical people,' -- including government officials, are entitled to rely." .
 The final issue in this case is whether the detention of respondent was reasonably related in scope to the circumstances which justified it initially. In this regard we have cautioned that courts should not indulge in "unrealistic second-guessing," and we have noted that "creative [judges], engaged in *post hoc* evaluations of police conduct can almost always imagine some alternative means by which the objectives of the police might have been accomplished." But "[the] fact that the protection of the public might, in the abstract, have been accomplished by 'less intrusive' means does not, in itself, render the search unreasonable." Authorities must be allowed "to graduate their response to the demands of any particular situation." Here, respondent was detained incommunicado for almost 16 hours before inspectors sought a warrant; the warrant then took a number of hours to procure, through no apparent fault   of the inspectors. This length of time undoubtedly exceeds any other detention we have approved under reasonable suspicion. But we have also consistently rejected hard-and-fast time limits. Instead, "common sense and ordinary human experience must govern over rigid criteria."
 The rudimentary knowledge of the human body which judges possess in common with the rest of humankind tells us that alimentary canal smuggling cannot be detected in the amount of time in which other illegal activity may be investigated through brief *Terry-*type stops. It presents few, if any external signs; a quick frisk will not do, nor will even a strip search. In the case of respondent the inspectors had available, as an alternative to simply awaiting her bowel movement, an x ray. They offered her the alternative of submitting herself to that procedure. But when she refused that alternative, the customs inspectors were left with only two practical alternatives: detain her for such time as necessary to confirm their suspicions, a detention which would last much longer than the typical *Terry* stop, or turn her loose into the interior carrying the reasonably suspected contraband drugs.
 The inspectors in this case followed this former procedure. They no doubt expected    that respondent, having recently disembarked from a 10-hour direct flight with a full and stiff abdomen, would produce a bowel movement without extended delay. But her visible efforts to resist the call of nature, which the court below labeled "heroic," disappointed this expectation and in turn caused her humiliation and discomfort. Our prior cases have refused to charge police with delays in investigatory detention attributable to the suspect's evasive actions and that principle applies here as well. Respondent alone was responsible for much of the duration and discomfort of the seizure.
**Holding**
  Under these circumstances, we conclude that the detention in this case was not unreasonably long. It occurred at the international border, where the Fourth Amendment balance of interests leans heavily to the Government. At the border, customs officials have more than merely an investigative law enforcement role. They are also charged, along with immigration officials, with protecting this Nation from entrants who may bring anything harmful into this country, whether that be communicable diseases, narcotics, or explosives. In this regard the detention of a suspected alimentary canal smuggler at the border is analogous to the detention of a suspected tuberculosis carrier at the border: both are detained until their bodily processes dispel the suspicion that they will introduce a harmful agent into this country. Respondent's detention was long, uncomfortable, indeed, humiliating; but both its length and its discomfort resulted *solely* from the method by which she chose to smuggle illicit drugs into this country. In *Adams* v. *Williams*, 407 U.S. 143 (1972), another *Terry-*stop case, we said that "[the] Fourth Amendment does not require a policeman who lacks the precise level of information necessary for probable cause to arrest to simply shrug his shoulders and allow a crime to occur or a criminal to escape." Here, by analogy, in the presence of articulable suspicion of smuggling in her alimentary canal, the customs officers were not required by the Fourth Amendment to pass respondent and her 88 cocaine-filled balloons into the interior. Her detention for the period of time necessary to either verify or dispel the suspicion was not unreasonable.

Brennan, J., joined by Marshall, J. **dissenting**

I dissent. Indefinite involuntary incommunicado detentions "for investigation" are the hallmark of a police state, not a free society. In my opinion, Government officials may no more confine a person at the border under such circumstances for purposes of criminal investigation than they may within the interior of the country. The nature and duration of the detention here may well have been tolerable for spoiled meat or diseased animals, but not for human beings held on simple suspicion of criminal activity. I believe such indefinite detentions can be "reasonable" under the Fourth Amendment only with the approval of a magistrate. I also believe that such approval can be given only upon a showing of probable cause.
 Travelers at the national border are routinely subjected to questioning, patdowns, and thorough searches of their belongings. These measures, which involve relatively limited invasions of privacy and which typically are conducted on all incoming travelers, do not violate the Fourth Amendment given the interests of "national self protection reasonably requiring one entering the  country to identify himself as entitled to come in, and his belongings as effects which may be lawfully brought in." Individual travelers also may be singled out on "reasonable suspicion" and briefly held for further investigation. At some point, however, further investigation involves such severe intrusions on the values the Fourth Amendment protects that more stringent safeguards are required….

The available evidence suggests that the number of highly intrusive border searches of suspicious-looking but ultimately innocent travelers may be very high. One physician who at the request of customs officials conducted many "internal searches" -- rectal and vaginal examinations and stomach pumping -- estimated that he had found contraband in only 15 to 20 percent of the persons he had examined. It has similarly been estimated that only 16 percent of women subjected to body-cavity searches at the border were in fact   found to be carrying contraband. It is precisely to minimize the risk of harassing so many innocent people that the Fourth Amendment requires the intervention of a judicial officer. And even if the warrant safeguard were somehow a mere inconvenient nuisance to be "'weighed' against the claims of police efficiency," the Government points to no unusual efficiency concerns suggesting that this safeguard should be overridden in the run of such intrusive border-search cases. Certainly there were no "exigent circumstances" supporting the indefinite warrantless detention here, and the Government's interest in proceeding expeditiously could have been achieved by obtaining a telephonic search warrant -- a procedure "ideally suited to the peculiar needs of the customs authorities" and one that ultimately was used in this case a full day after De Hernandez was first detained.
 The Court supports its evasion of the warrant requirement, however, by analogizing to the *Terry* line of cases authorizing brief detentions based on reasonable suspicion. It argues that no "hard-and-fast time limits" can apply in this context because "alimentary canal smuggling cannot be detected in the amount of time in which other illegal activity may be investigated through brief *Terry-*type stops."… [T]oday's opinion is the most extraordinary example to date of the Court's studied effort to employ the *Terry* decision as a means of converting the Fourth Amendment into a general "reasonableness" balancing process -- a process "in which the judicial thumb apparently will be planted firmly on the law enforcement side of the scales." …Allowing such warrantless detentions under *Terry* suggests that the authorities might hold a person on suspicion for "however long it takes" to get him to cooperate, or to transport him to the station where the "legitimate" state interests more fully can be pursued, or simply to lock him away while deciding what the State's "legitimate" interests require. But the Fourth Amendment flatly prohibits such "wholesale intrusions upon the personal security" of individuals, and any application of *Terry* even by analogy to permit such indefinite detentions "would threaten to swallow" the basic probable-cause and warrant safeguards. It is simply staggering that the Court suggests that *Terry* would even begin to sanction a 27-hourcriminal-investigative detention, even one occurring at the border.
 The Court further appears to believe that such investigative practices are "reasonable," however, on the premise that a traveler's "expectation of privacy [is] less at the border than in the interior." This may well be so with respect to routine border inspections, but I do not imagine that decent and law-abiding international travelers have yet reached the point where they "expect" to be thrown into locked rooms and ordered to excrete into wastebaskets, held incommunicado until they cooperate, or led away in handcuffs to the nearest hospital for exposure to various medical procedures -- all on nothing more than the "reasonable" suspicions of low-ranking enforcement agents. In fact, many people from around the world travel to our borders precisely to escape such unchecked executive investigatory discretion. What a curious first lesson in American liberty awaits them  on their arrival.
 I believe that De Hernandez' detention violated the Fourth Amendment…it was not supported by probable cause. In the domestic context, a detention of the sort that occurred here would be permissible only if there were probable cause at the outset. This same elementary safeguard should govern border searches when carried out for purposes of criminal investigation.
 To be sure, it is commonly asserted that as a result of the Fourth Amendment's "border exception" there is no requirement of probable cause for such investigations. Contrary to the Court's reasoning, however, the Government in carrying out such immigration and customs functions does not simply have the two stark alternatives of either forcing  a traveler to submit to such procedures or allowing him to "pass . . . into the interior." There is a third alternative: to instruct the traveler who refuses to submit to burdensome but reasonable conditions of entry that he is free to turn around and leave the country….
 In my opinion, allowing the Government to hold someone in indefinite, involuntary, incommunicado isolation without  probable cause and a judicial warrant violates our constitutional charter whether the purpose is to extract ransom or to investigate suspected criminal activity. Nothing in the Fourth Amendment permits an exception for such actions at the Nation’s border. It is tempting, of course, to look the other way in a case that so graphically illustrates the “veritable national crisis” caused by narcotics trafficking. But if there is one enduring lesson in the long struggle to balance individual rights against society’s need to defend itself against lawlessness, it is that “[it] is easy to make light of insistence on scrupulous regard for the safeguards of civil liberties when invoked on behalf of the unworthy. It is too easy. History bears testimony that by such disregard are the rights of liberty extinguished, heedlessly at first, then stealthily, and brazenly in the end.”

Neither the law of the land nor the law of nature supports the notion that petty government officials can require people to excrete on command….And with all respect to the Court, it is not “unreasonable second-guessing” to predict that an innocent traveler, locked away in incommunicado detention in unfamiliar surroundings in a foreign land, might well be so frightened and exhausted as to be unable to “cooperate” with authorities.”

**Questions for Discussion**

1. Why does the Supreme Court hold that the procedure followed in *Montoya de Hernandez* is reasonable under the Fourth Amendment. How would the Supreme Court rule in the event that this was a routine domestic case involving a suspected drug smuggler.

2. What is the view of the dissent. Would following the opinion of the dissent weaken the border security of the United States.

3. How would you rule in the event that *Montoya de Hernandez* was an American citizen. Should the Fourth Amendment and the U.S. Constitution even be applied to protect the “rights” of individuals crossing the border.

# DID THE POLICE INVESTIGATIVE TECHNIGUES GO BEYOND THE LIMITS OF A *TERRY* STOP?

*FLORIDA V. ROYER*

460 U.S. 491 (1983)

White, J.
**Facts**
On January 3, 1978, Royer was observed at Miami International Airport by two plainclothes detectives of the Dade County, Fla., Public Safety Department assigned to the county's Organized Crime Bureau, Narcotics Investigation Section. Detectives Johnson and Magdalena believed that Royer's appearance, mannerisms, luggage, and actions fit the so-called "drug courier profile." Royer, apparently unaware of the attention he had attracted, purchased a one-way ticket to New York City and checked his two suitcases,   placing on each suitcase an identification tag bearing the name "Holt" and the destination "La Guardia." As Royer made his way to the concourse which led to the airline boarding area, the two detectives approached him, identified themselves as policemen working out of the sheriff's office, and asked if Royer had a "moment" to speak with them; Royer said "Yes."
 The "drug courier profile" is an abstract of characteristics found to be typical of persons transporting illegal drugs. In Royer's case, the detectives attention was attracted by the following facts which were considered to be within the profile: (a) Royer was carrying American Tourister luggage, which appeared to be heavy, (b) he was young, apparently between 25-35, (c) he was casually dressed, (d) he appeared pale and nervous, looking around at other people, (e) he paid for his ticket in cash with a large number of bills, and (f) rather than completing the airline identification tag to be attached to checked baggage, which had space for a name, address, and telephone number, he wrote only a name and the destination.
 Upon request, but without oral consent, Royer produced for the detectives his airline ticket and his driver's license. The airline ticket, like the baggage identification tags, bore the name "Holt," while the driver's license carried respondent's correct name, "Royer." When the detectives asked about the discrepancy, Royer explained that a friend had made the reservation in the name of "Holt." Royer became noticeably more nervous during this conversation, whereupon the detectives informed Royer that they were in fact narcotics investigators and that they had reason to suspect him of transporting narcotics.
 The detectives did not return his airline ticket and identification but asked Royer to accompany them to a room, approximately 40 feet away, adjacent to the concourse. Royer said nothing in response but went with the officers as he had been asked to do. The room was later described by Detective Johnson as a "large storage closet," located in the stewardesses' lounge and containing a small desk and two chairs. Without Royer's consent or agreement, Detective Johnson, using Royer's baggage check stubs, retrieved the "Holt" luggage from the airline and brought it to the room where respondent and Detective Magdalena were waiting. Royer was asked if he would consent to a search of the suitcases. Without orally responding to this request, Royer produced a key and unlocked one of the suitcases, which one detective then opened without seeking further assent from Royer. Marihuana was found in that suitcase. According to Detective Johnson, Royer stated that he did not know the combination to the lock on the second suitcase. When asked if he objected to the detective opening the second suitcase, Royer said "[no], go ahead," and did not object when the detective explained that the suitcase might have to be broken open. The suitcase was pried open by the officers and more marihuana was found. Royer was then told that he was under arrest. Approximately 15 minutes had elapsed from the time the detectives initially approached respondent until his arrest upon the discovery of the contraband.
 Prior to his trial for felony possession of marihuana, Royer made a motion to suppress the evidence obtained in the search of the suitcases. …Royer was convicted.
The District Court of Appeal, sitting en banc, reversed Royer's conviction. The court held that Royer had been involuntarily confined within the small room without probable cause; that the involuntary detention had exceeded the limited restraint permitted by *Terry* v. *Ohio* at the time his consent to the search was obtained; and that the consent to search was therefore invalid because tainted by the unlawful confinement.
 On appeal, a panel of the District Court of Appeal of Florida found that viewing the totality of the circumstances, the finding of …the trial court was supported by clear and convincing evidence….
 At the suppression hearing Royer testified that he was under the impression that he was not free to leave the officers' presence. The Florida District Court of Appeal found that this apprehension "was much more than a well-justified subjective belief," for the State had conceded at oral argument before that court that "the officers would not have permitted Royer to leave the room even if he had erroneously thought he could."
 The nomenclature used to describe Royer's confinement, the court found, was unimportant because under *Dunaway* v. *New York*, 442 U.S. 200 (1979), "a police confinement which . . . goes beyond the limited restraint of a *Terry* investigatory stop may be constitutionally justified only by probable cause." Detective Johnson, who conducted the search, had specifically stated at the suppression hearing that he did not have probable cause to arrest Royer until the suitcases were opened and their contents revealed.  In the absence of probable cause, the court concluded, Royer's consent to search, given only after he had been unlawfully confined, was ineffective to justify the search. …
**Issue**

The events in this case amounted to no more than a permissible police encounter in a public place or a justifiable *Terry-*type detention, Royer's consent, if voluntary, would have been effective to legalize the search of his two suitcases. In the case before us, however, concluded not only that Royer had been seized when he gave his consent to search his luggage but also that the bounds of an investigative stop had been exceeded. In its view the "confinement" in this case went beyond the limited restraint of a *Terry* investigative stop, and Royer's consent was thus tainted by the illegality, a conclusion that required reversal in the absence of probable cause to arrest. The question before us is whether the record warrants that conclusion. We think that it does.
**Reasoning**
*Terry* and its progeny…created only limited exceptions to the general rule that seizures of the person require probable cause to arrest…. In the name of investigating a person who is no more than suspected of criminal activity, the police may not carry out a full search of the person or of his automobile or other effects. Nor may the police seek to verify their suspicions by means that approach the conditions of arrest. *Dunaway* v. *New York,* 442 U.S. 200 (1079), made this clear. There, the suspect was taken to the police station from his home and, without being formally arrested, interrogated for an hour. The resulting incriminating statements were held inadmissible: reasonable suspicion of crime is insufficient to justify custodial interrogation even though the interrogation is investigative.

The predicate permitting seizures on suspicion short of probable cause is that law enforcement interests warrant a limited intrusion on the personal security of the suspect. The scope of the intrusion permitted will vary to some extent with the particular facts and circumstances of each case. This much, however, is clear: an investigative detention must be temporary and last no longer than is necessary to effectuate the purpose of the stop. Similarly, the investigative methods employed should be the least intrusive means reasonably available to verify or dispel the officer's suspicion in a short period of time. It is the State's burden to demonstrate that the seizure it seeks to justify on the basis of a reasonable suspicion was sufficiently limited in scope and duration to satisfy the conditions of an investigative seizure.
 By the time Royer was informed that the officers wished to examine his luggage, he had identified himself when approached by the officers and had attempted to explain the discrepancy between the name shown on his identification and the name under which he had purchased his ticket and identified his luggage. The officers were not satisfied, for they informed him they were narcotics agents and had reason to believe that he was carrying illegal drugs. They requested him to accompany them to the police room. Royer went with them. He found himself in a small room -- a large closet -- equipped with a desk and two chairs. He was alone with two police officers who again told him that they thought  he was carrying narcotics. He also found that the officers, without his consent, had retrieved his checked luggage from the airline. What had begun as a consensual inquiry in a public place had escalated into an investigatory procedure in a police interrogation room, where the police, unsatisfied with previous explanations, sought to confirm their suspicions. The officers had Royer's ticket, they had his identification, and they had seized his luggage. Royer was never informed that he was free to board his plane if he so chose, and he reasonably believed that he was being detained. At least as of that moment, any consensual aspects of the encounter had evaporated, and we cannot fault the Florida District Court of Appeal for concluding that *Terry* v. *Ohio* and the cases following it did not justify the restraint to which Royer was then subjected. As a practical matter, Royer was under arrest. Consistent with this conclusion, the State conceded in the Florida courts that Royer would not have been free to leave the interrogation room had he asked to do so. Furthermore, the State's brief in this Court interprets the testimony of the officers at the suppression hearing as indicating that had Royer refused to consent to a search of his luggage, the officers would have held the luggage and sought a warrant to authorize the search.
 We also think that the officers' conduct was more intrusive than necessary to effectuate an investigative detention otherwise authorized by the *Terry* line of cases. First, by returning his ticket and driver's license, and informing him that he was free to go if he so desired, the officers might have obviated any claim that the encounter was anything but a consensual matter from start to finish. Second, there are undoubtedly reasons of safety and security that would justify moving a suspect from one location to another during an investigatory detention, such as from an airport concourse to a more  private area. There is no indication in this case that such reasons prompted the officers to transfer the site of the encounter from the concourse to the interrogation room. It appears, rather, that the primary interest of the officers was not in having an extended conversation with Royer but in the contents of his luggage, a matter which the officers did not pursue orally with Royer until after the encounter was relocated to the police room. The record does not reflect any facts which would support a finding that the legitimate law enforcement purposes which justified the detention in the first instance were furthered by removing Royer to the police room prior to the officers' attempt to gain his consent to a search of his luggage. As we have noted, had Royer consented to a search on the spot, the search could have been conducted with Royer present in the area where the bags were retrieved by Detective Johnson and any evidence recovered would have been admissible against him. If the search proved negative, Royer would have been free to go much earlier and with less likelihood of missing his flight, which in itself can be a very serious matter in a variety of circumstances.
 The State has not touched on the question whether it would have been feasible to investigate the contents of Royer's bags in a more expeditious way. The courts are not strangers to the use of trained dogs to detect the presence of controlled substances in luggage. There is no indication here that this means was not feasible and available. If it had been used, Royer and his luggage could have been momentarily detained while this investigative procedure was carried out. Indeed, it may be that no detention at all would have been necessary. A negative result would have freed Royer in short order; a positive result would have resulted in his justifiable arrest on probable cause.
 The State's…and final argument is that Royer was not being illegally held when he gave his consent because there was probable cause to arrest him at that time. Detective Johnson testified at the suppression hearing and the Florida District Court of Appeal held that there was no probable cause to arrest until Royer's bags were opened, but the fact that the officers did not believe there was probable cause and proceeded on a consensual or *Terry-*stop rationale would not foreclose the State from justifying Royer's custody by proving probable cause and hence removing any barrier to relying on Royer's consent to search. That probable cause to arrest Royer did not exist at the time he consented to the search of his luggage. The facts are that a  nervous young man with two American Tourister bags paid cash for an airline ticket to a "target city." These facts led to inquiry, which in turn revealed that the ticket had been bought under an assumed name. The proffered explanation did not satisfy the officers. We cannot agree with the State, if this is its position, that every nervous young man paying cash for a ticket to New York City under an assumed name and carrying two heavy American Tourister bags may be arrested and held to answer for a serious felony charge.
**Holding**
Because we affirm the Florida District Court of Appeal's conclusion that Royer was being illegally detained when he consented to the search of his luggage, we agree that the consent  was tainted by the illegality and was ineffective to justify the search. The judgment of the Florida District Court of Appeal is accordingly

Justice Rehnquist, with whom Justice O’Connor join, **dissenting.**
 The plurality's meandering opinion contains in it a little something for everyone, and although it affirms the reversal of a judgment of conviction, it can scarcely be said to bespeak  a total indifference to the legitimate needs of law enforcement agents seeking to curb trafficking in dangerous drugs. Indeed, in both manner and tone, the opinion brings to mind the old nursery rhyme:
 The plurality inferentially concedes, as of course it must, that at the time the suitcases were opened and 65 pounds of marihuana were disclosed, the officers had probable cause to arrest and detain Royer. But working backward through this very brief encounter, the plurality manages to sufficiently fault the officers' conduct so as to require that Royer's conviction for smuggling drugs be set aside. Analyzed in terms of the "reasonableness" which must attend any search and seizure under the requirements of the Fourth Amendment, I find it impossible to conclude that any step in the officers' efforts to apprehend Royer fails to meet that test.
  The detectives had learned, among other things, that (1) Royer was carrying two heavy suitcases; (2) he was visibly nervous, exhibiting the behavior of a person trying to identify  and evade police officers; (3) at a ticket counter in a major import center for illicit drugs, he had purchased a ticket for a city that is a major distribution center for such drugs; (4) he paid for his ticket from a large roll of small denomination bills, avoiding the need to show identification; (5) in filling out his baggage tags, Royer listed only a last name and the airport of destination, failing to give his full name, address, and phone number in  the provided spaces, and (6) he was traveling under an assumed name.
Few statistics have been kept on the effectiveness of "profile" usage, but the data available suggest it has been a success. In the first few months of a "profile" program at the Detroit Metropolitan Airport, 141 persons were searched in 96 different encounters; drugs were discovered in 77 of the searches. SA DEA agent working at the La Guardia Airport in New York City estimated that some 60% percent of the persons identified as having "profile" characteristics are found to be carrying drugs. Because of this success, state and local law enforcement agencies also have instructed narcotics officers according to "drug courier profiles." It was partly on the basis of "profile" characteristics that Detectives Johnson and Magdalena initially began surveillance of Royer. Certainly in this case the use of the "profile" proved effective.
 The point at which I part company with the plurality's opinion is in the assessment of the reasonableness of the officers' conduct following their initial conversation with Royer.   The plurality focuses on the transfer of the place of the interview from the main concourse of the airport to the room off the concourse and observes that Royer "found himself in a small room -- a large closet -- equipped with a desk and two chairs. He was alone with two police officers who again told him that they thought he was carrying narcotics. He also found that the officers, without his consent, had retrieved his checked luggage from the airline."
 Obviously, [the majority opinion] convey[s] stern disapproval of the described conduct of the officers. To my mind, it merits no such disapproval and was eminently reasonable. Would it have been preferable for the officers to have detained Royer for further questioning, as they concededly had a right to do, without paying any attention to the fact that his luggage had already been checked on the flight to New York, and might be put aboard the flight even though Royer himself was not on the plane? Would it have been more "reasonable" to interrogate Royer about the contents of his suitcases, and to seek his permission to open the suitcases  when they were retrieved, in the busy main concourse of the Miami Airport, rather than to find a room off the concourse where the confrontation would surely be less embarrassing to Royer? If the room had been large and spacious, rather than small, if it had possessed three chairs rather than two, would the officers' conduct have been made reasonable by these facts?
 The plurality's answers to these questions, to the extent that it attempts any, are scarcely satisfying. It commences with the observation that "the officers' conduct was more intrusive than necessary to effectuate an investigative detention otherwise authorized by the *Terry* line of cases.”…The plurality goes on to say that had the officers returned Royer's ticket and driver's license, the encounter clearly would have been consensual. The plurality also states that while there were good reasons to justify moving Royer from one location to another, the officers' motives in seeking to examine his luggage render these reasons unavailing -- a conclusion the reason for which wholly escapes me. Finally, the plurality suggests that the officers might have examined Royer's bags in a more expeditious way, such as the use of trained dogs.
 All of this to my mind adds up to little more than saying that if my aunt were a man, she would be my uncle. The officers might have taken different steps than they did to investigate Royer, but the same may be said of virtually every investigative encounter that has more than one step to it. The question we must  decide is what was unreasonable about the steps which these officers took with respect to this suspect  in the Miami Airport on this particular day. On this point, the plurality stutters, fudges, and hedges:
 Since the plurality concedes the existence of "articulable suspicion" at least after the initial conversation with Royer, the only remaining question is whether the detention of Royer during that period of time was permissible under the rule enunciated in *Terry* v. *Ohio.* The plurality concludes that somewhere between the beginning of the 40-foot journey and the resumption of conversation in the room the investigation became so intrusive that Royer's consent "evaporated" leaving him "[as] a practical matter . . . under arrest." But if Royer was legally approached in the first instance and consented to accompany the detectives to the room, it does not follow that his consent went up in smoke and he was "arrested" upon entering the room. …

**Questions for Discussion**

1. Why was Royer stopped by the plainclothes detectives.

2. Explain how the facts in *Royer* illustrate the following quote from the case*.* “[A]n investigative detention must be temporary and last no longer than is necessary to effectuate the purpose of the stop. Similarly, the investigative methods employed should be the least intrusive means reasonably available to verify or dispel the officer's suspicion in a short period of time. It is the State's burden to demonstrate that the seizure it seeks to justify on the basis of a reasonable suspicion was sufficiently limited in scope and duration to satisfy the conditions of an investigative seizure.”
3. What procedures does the Supreme Court suggest that the police should have followed in *Royer.*

4, Provide a three sentence description of the Supreme Court’s holding in *Royer* that will help us to understand the rights of a citizen who is subjected to a stop and frisk *.*.

5. **Problems in policing**. As a law enforcement officer, when can you “move” a suspect who is detained on a *Terry* stop, how long may the stop last and what steps may you take to protect yourself.

# Case of *Pennsylvania v. Mimms*

*PENNSYLVANIA V. MIMMS*

434 U. S. 106 (1977)

Per Curiam
**Facts**
 While on routine patrol, two Philadelphia police officers observed respondent Harry Mimms driving an automobile with an expired license plate. The officers stopped the vehicle for the purpose of issuing a traffic summons. One of the officers approached and asked respondent to step out of the car and produce his owner's card and operator's license. Respondent alighted, whereupon the officer noticed a large bulge under respondent's sports jacket. Fearing that the bulge might be a weapon, the officer frisked respondent and discovered in his waistband a .38-caliber revolver loaded with five rounds of ammunition. The other occupant of the car was carrying a .32-caliber revolver. Respondent was immediately arrested and subsequently indicted for carrying a concealed deadly weapon and for unlawfully carrying a firearm without a license. His motion to suppress the revolver was denied; and, after a trial at which the revolver was introduced into evidence, respondent was convicted on both counts.
 As previously indicated, the Supreme Court of Pennsylvania reversed respondent's conviction, however, holding that the revolver should have been suppressed because it was seized contrary to the guarantees contained in the Fourth and Fourteenth Amendments to the United States Constitution. The Pennsylvania court did not doubt that the officers acted reasonably in stopping the car. It was also willing to assume, *arguendo,* that the limited search for weapons was proper once the officer observed the bulge under respondent's coat. But the court nonetheless thought the search constitutionally infirm   because the officer's order to respondent to get out of the car was an impermissible "seizure." This was so because the officer could not point to "objective observable facts to support a suspicion that criminal activity was afoot or that the occupants of the vehicle posed a threat to police safety." Since this unconstitutional intrusion led directly to observance of the bulge and to the subsequent "pat down," the revolver was the fruit of an unconstitutional search, and, in the view of the Supreme Court of Pennsylvania, should have been suppressed.
 **Issue**
[truncated: 3,490,499 more chars]
